# Supplementary material for: Unraveling mechanisms of the uncoordinated nucleophiles: theoretical elucidations of the cleavage of bis(p-nitrophenyl) phosphate mediated by zinc-complexes with apical nucleophiles
Source: Royal Society of Chemistry journal article supplement (doi:10.1039/c9ra06737j), 2019-01-01
Supplement: c9ra06737j1.pdf [file c9ra06737j1.pdf]

## Electronic Supplementary Information

# Unraveling Mechanisms of the Uncoordinated Nucleophiles: Theoretical Elucidations of the Cleavage of Bis(*p*- nitrophenyl) Phosphate Mediated by Zinc-Complexes with Apical Nucleophiles

Xiaoyu Zhou,<sup>a,ξ</sup>Xue-Peng Zhang,<sup>b,ξ</sup>Weikang Li,<sup>a</sup>Jingxing Jiang,<sup>c</sup>Huiying Xu,<sup>a</sup>Zhuofeng Ke,<sup>c</sup>

David Lee Phillips,<sup>d</sup> and Cunyuan Zhao<sup>\*,a</sup>

<sup>a</sup> MOE Key Laboratory of Bioinorganic and Synthetic Chemistry, School of Chemistry, Sun Yat-sen University, Guangzhou 510275, P. R. China.

<sup>b</sup> School of Chemistry and Chemical Engineering, Shaanxi Normal University, Xi'an 710119, P. R. China.

<sup>c</sup> MOE Key Laboratory of Bioinorganic and Synthetic Chemistry, School of Chemistry, School of Materials Science and Engineering, Sun Yat-sen University, Guangzhou 510275, P. R. China.

<sup>d</sup> Department of Chemistry, University of Hong Kong, Pokfulam Road, Hong Kong, P. R. China.

\*Correspondence Author: ceszhcy@mail.sysu.edu.cn

## Contents

|                                                                                                                                                                                         |    |
|-----------------------------------------------------------------------------------------------------------------------------------------------------------------------------------------|----|
| 1. The pKa values of the mono-deprotonations of [Zn <sup>II</sup> (LnH)(H <sub>2</sub> O) <sub>2</sub> ] <sup>+</sup> (n=1, 2 and 3) complexes using B3LYP, TPSS and PBE functions..... | S2 |
| 2. The analysis of Fukui function for the [Zn(Ln)(η-H <sub>2</sub> O)] <sup>+</sup> complexes and [Zn(Ln)(η-H <sub>2</sub> O)] <sup>+</sup> complexes.....                              | S2 |
| 3. The length of Zn-O/N(Nu) and NPA atomic charge distribution analysis. ....                                                                                                           | S3 |
| 4. The optimized structures.....                                                                                                                                                        | S5 |
| 5. Cartesian coordinates of optimized structures.....                                                                                                                                   | S6 |

**1. The pKa values of the mono-deprotonations of [Zn<sup>II</sup>(L<sup>n</sup>H)(H<sub>2</sub>O)<sub>2</sub>]<sup>+</sup> (n=1, 2 and 3) complexes using B3LYP, TPSS and PBE functions**

**Table S1.** The pKa values of the mono-deprotonations of [Zn<sup>II</sup>(L<sup>n</sup>H)(H<sub>2</sub>O)<sub>2</sub>]<sup>+</sup> (n=1, 2 and 3) complexes using B3LYP, TPSS and PBE functions.

|       | structures                                                                      | Zn-L <sup>1</sup> | Zn-L <sup>2</sup> | Zn-L <sup>3</sup> |
|-------|---------------------------------------------------------------------------------|-------------------|-------------------|-------------------|
| B3LYP | [Zn <sup>II</sup> L <sup>n</sup> (H <sub>2</sub> O) <sub>2</sub> ] <sup>+</sup> | 14.5              | 10.0              | 8.8               |
|       | [Zn <sup>II</sup> L <sup>n</sup> H(H <sub>2</sub> O)(OH)] <sup>+</sup>          | 12.6              | 10.3              | 11.4              |
| TPSS  | [Zn <sup>II</sup> L <sup>n</sup> (H <sub>2</sub> O) <sub>2</sub> ] <sup>+</sup> | 13.6              | 9.0               | 8.1               |
|       | [Zn <sup>II</sup> L <sup>n</sup> H(H <sub>2</sub> O)(OH)] <sup>+</sup>          | 12.0              | 10.2              | 10.8              |
| PBE   | [Zn <sup>II</sup> L <sup>n</sup> (H <sub>2</sub> O) <sub>2</sub> ] <sup>+</sup> | 11.7              | 8.4               | 5.7               |
|       | [Zn <sup>II</sup> L <sup>n</sup> H(H <sub>2</sub> O)(OH)] <sup>+</sup>          | 10.2              | 8.4               | 9.4               |

**2. The analysis of Fukui function for the [Zn(L<sup>n</sup>)(η-H<sub>2</sub>O)]<sup>+</sup> complexes and [Zn(L<sup>n</sup>)(η-H<sub>2</sub>O)]<sup>+</sup> complexes.**

**Table S2.** The analysis of Fukui function for the [Zn(L<sup>n</sup>)(η-H<sub>2</sub>O)]<sup>+</sup> complexes and [Zn(L<sup>n</sup>)(η-H<sub>2</sub>O)]<sup>+</sup> complexes.

|                                                        | <i>N</i> | <i>N-1</i> | <i>N+1</i> | <i>f</i> <sup>-</sup> | <i>f</i> <sup>+</sup> | Δ <i>f</i> |
|--------------------------------------------------------|----------|------------|------------|-----------------------|-----------------------|------------|
| [Zn(L <sup>1</sup> )(η-H <sub>2</sub> O)] <sup>+</sup> | -0.305   | -0.101     | -0.311     | 0.204                 | 0.006                 | -0.199     |
| [Zn(L <sup>1</sup> H)(η-OH)] <sup>+</sup>              | -0.388   | -0.336     | -0.391     | 0.051                 | 0.003                 | -0.048     |
| [Zn(L <sup>2</sup> )(η-H <sub>2</sub> O)] <sup>+</sup> | -0.303   | -0.124     | -0.308     | 0.179                 | 0.005                 | -0.174     |
| [Zn(L <sup>2</sup> H)(η-OH)] <sup>+</sup>              | -0.385   | -0.334     | -0.389     | 0.051                 | 0.003                 | -0.048     |
| [Zn(L <sup>3</sup> )(η-H <sub>2</sub> O)] <sup>+</sup> | -0.374   | -0.033     | -0.381     | 0.340                 | 0.007                 | -0.333     |
| [Zn(L <sup>3</sup> H)(η-OH)] <sup>+</sup>              | -0.358   | -0.251     | -0.364     | 0.106                 | 0.006                 | -0.100     |

### 3. The length of Zn-O/N(Nu) and NPA atomic charge distribution analysis.

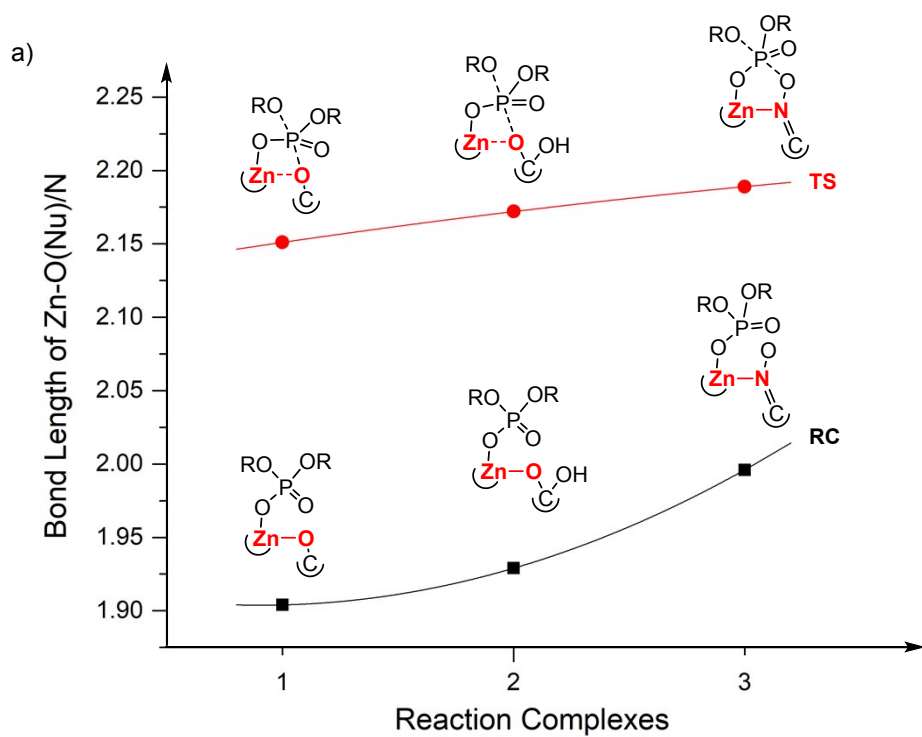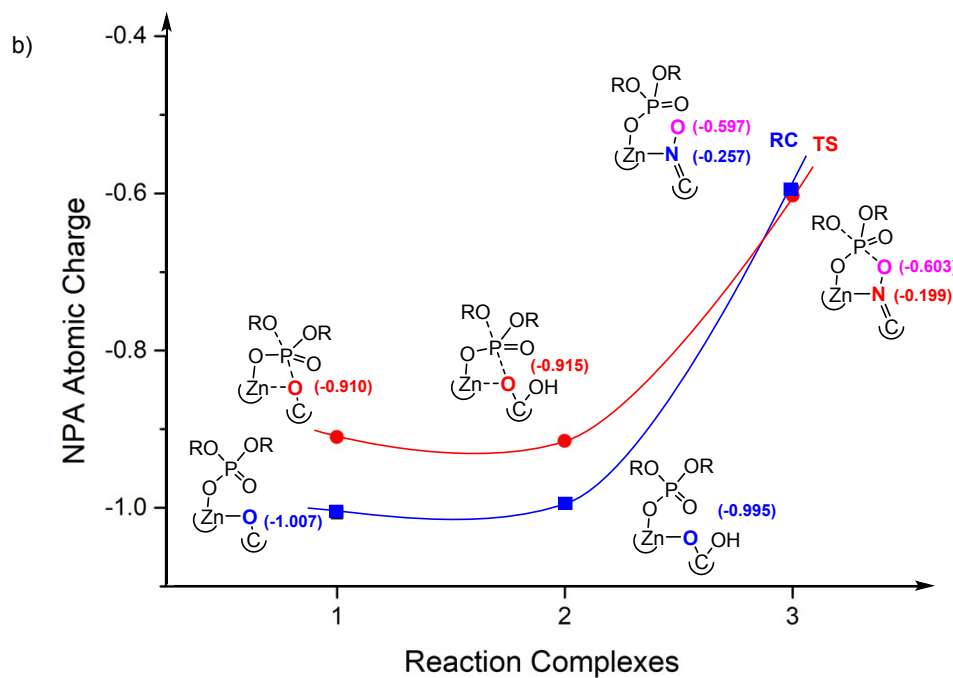

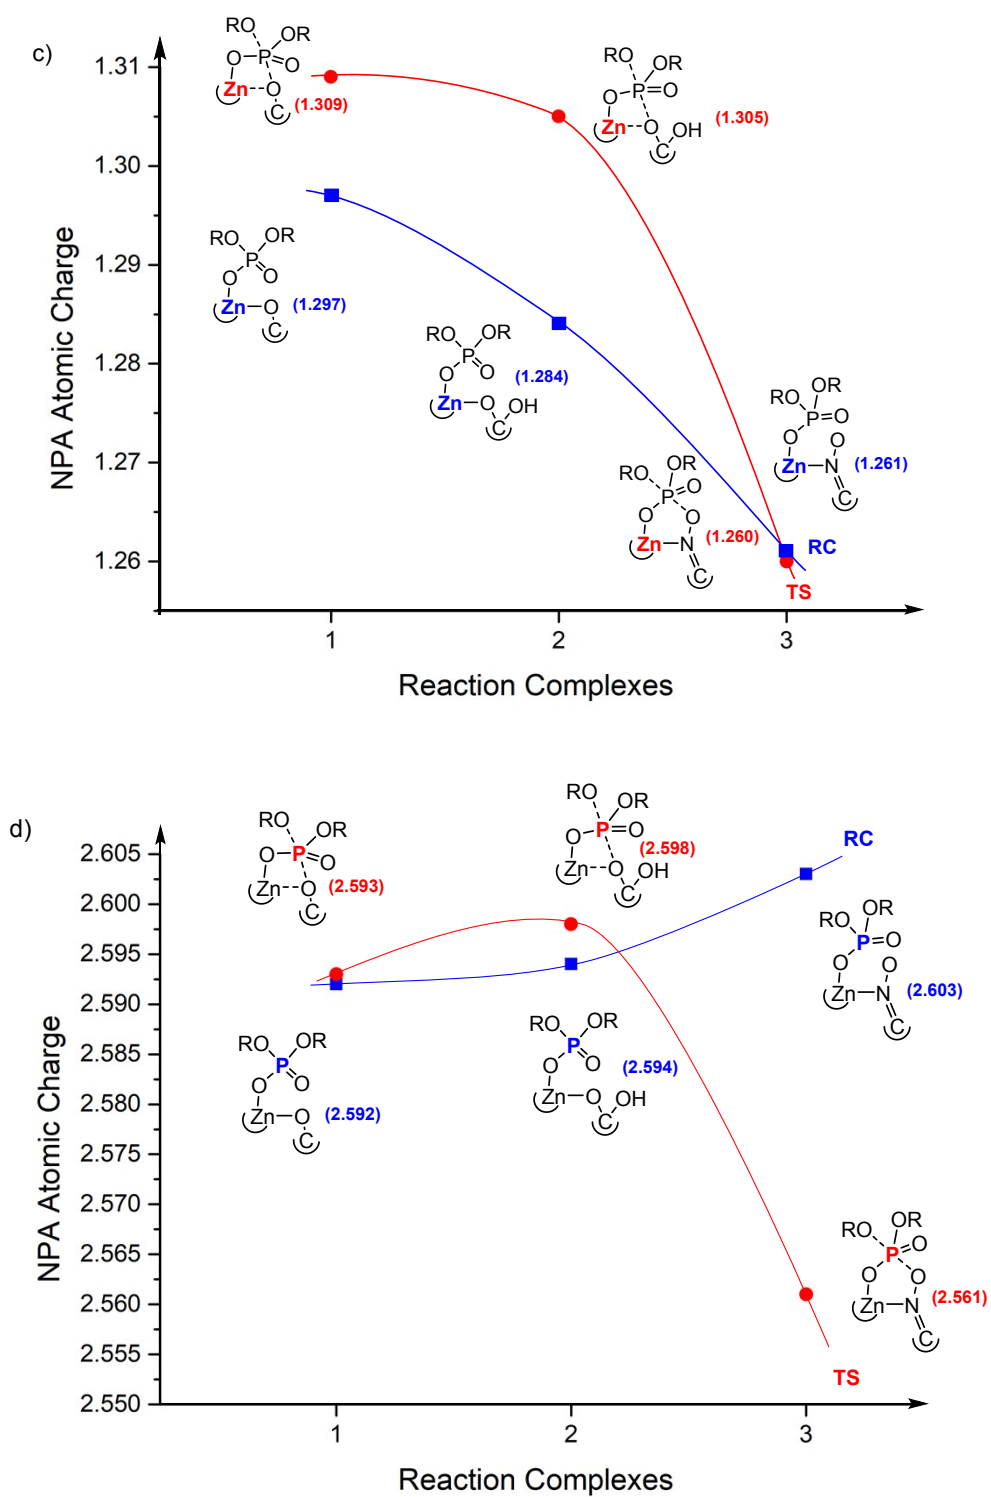

**Figure S1.** (a) The length of Zn-O/N(Nu), in Å. (b) NPA atomic charge distribution analysis of O/N(Nu) atom, (c) NPA atomic charge distribution analysis of Zn atom and (d) NPA atomic charge distribution analysis of P atom.

## 4. The optimized structures.

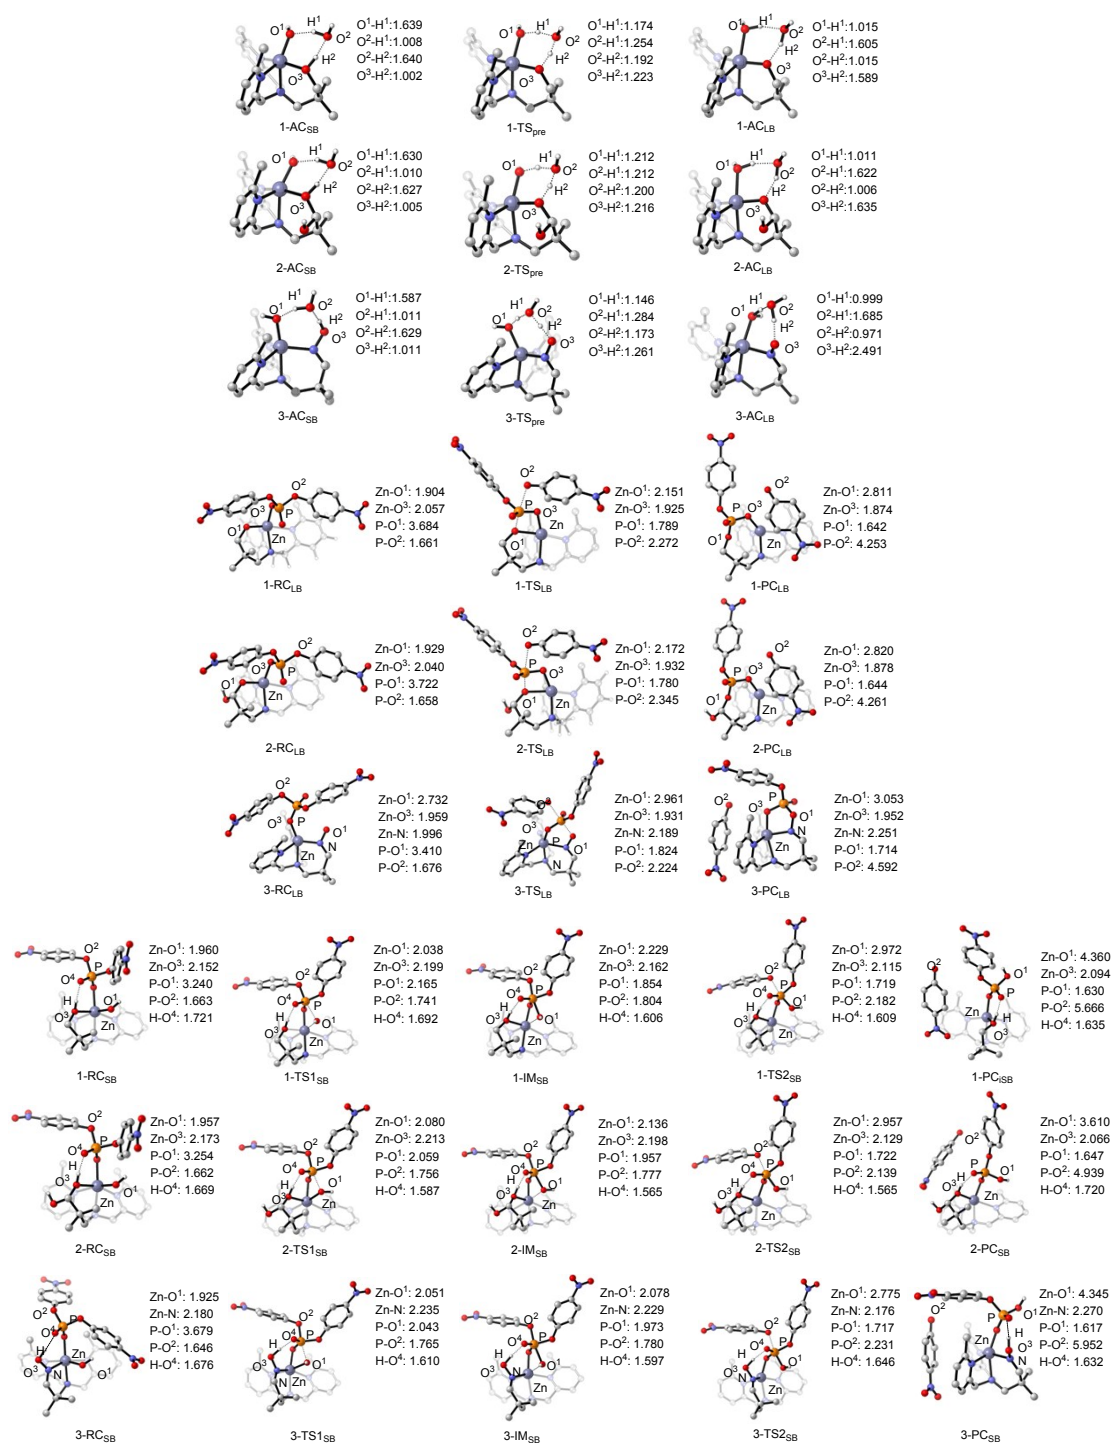

Figure S2. The optimized structures

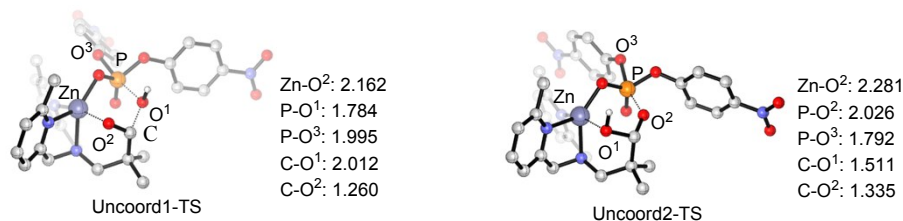

**Figure S3.** The optimized structures of Uncoord1-TS and Uncoord2-TS.

### 5. Cartesian coordinates of optimized structures.

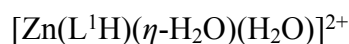

|    |             |             |             |
|----|-------------|-------------|-------------|
| Zn | -0.18543600 | 0.18599500  | 0.88599400  |
| N  | -1.94007700 | -0.75348600 | 0.16735500  |
| N  | -0.19752200 | 0.92371900  | -1.14793800 |
| N  | 1.48628900  | -0.82537200 | 0.27717100  |
| O  | 0.85556300  | 1.85370000  | 1.63717100  |
| C  | -2.56974900 | -1.83985800 | 0.67987000  |
| C  | -3.76229800 | -2.30187100 | 0.11456900  |
| H  | -4.25066300 | -3.17285700 | 0.53960000  |
| C  | -4.29657900 | -1.65678700 | -0.99692900 |
| H  | -5.22043300 | -2.00805600 | -1.44619800 |
| C  | -3.60853500 | -0.57455500 | -1.54896600 |
| H  | -3.97205300 | -0.07541100 | -2.44159400 |
| C  | -2.43248300 | -0.15045500 | -0.94295700 |
| C  | -1.63302000 | 1.00585600  | -1.51791500 |
| H  | -1.75135300 | 1.02760000  | -2.61020000 |
| H  | -2.02703700 | 1.95104000  | -1.13794600 |
| C  | 0.44286000  | -0.23639500 | -1.84434400 |
| H  | 0.73240800  | 0.03710100  | -2.86552600 |
| H  | -0.29969700 | -1.03661500 | -1.92520900 |
| C  | 1.62891700  | -0.77645800 | -1.06916500 |
| C  | 2.77338300  | -1.25336200 | -1.69489200 |
| H  | 2.87012300  | -1.19875700 | -2.77431000 |
| C  | 3.78619600  | -1.80544900 | -0.90540000 |
| H  | 4.69099200  | -2.18957700 | -1.36659600 |
| C  | 3.62932700  | -1.85008600 | 0.47832700  |
| H  | 4.40465300  | -2.26662500 | 1.11211500  |
| C  | 2.46359400  | -1.34215300 | 1.05837100  |
| C  | 0.53811500  | 2.18881000  | -1.49671500 |
| H  | 0.07129300  | 2.61832300  | -2.39314700 |
| H  | 1.55027000  | 1.89006400  | -1.78440800 |
| C  | 0.67503600  | 3.27932500  | -0.40909500 |
| C  | 1.54961800  | 2.78076300  | 0.75479200  |
| H  | 2.43230300  | 2.24687200  | 0.39117000  |
| H  | 1.88926100  | 3.62260800  | 1.36541000  |
| O  | -0.99138700 | 0.22646300  | 2.85699900  |

|   |             |             |             |
|---|-------------|-------------|-------------|
| H | -0.85539200 | 0.99312400  | 3.46110800  |
| H | -1.87360500 | -0.13630500 | 3.03434200  |
| H | 0.49844600  | 2.32869800  | 2.41515000  |
| O | -0.27329100 | 2.59852600  | 4.08561900  |
| H | -0.91599300 | 3.30873300  | 4.25986800  |
| H | 0.31984700  | 2.58614800  | 4.85827000  |
| C | 2.23197800  | -1.32616100 | 2.54313300  |
| H | 2.03455900  | -0.30246900 | 2.88171900  |
| H | 1.36141600  | -1.93770500 | 2.80870000  |
| H | 3.09522500  | -1.71290300 | 3.08852200  |
| C | -1.95171000 | -2.56179600 | 1.84966500  |
| H | -0.92045400 | -2.24740300 | 2.02598100  |
| H | -2.52840500 | -2.40549200 | 2.77083300  |
| H | -1.94919600 | -3.64147000 | 1.66948700  |
| C | 1.43661900  | 4.45026300  | -1.07151100 |
| H | 0.88250800  | 4.83828100  | -1.93219500 |
| H | 1.56783000  | 5.27558200  | -0.36439200 |
| H | 2.43002300  | 4.14454200  | -1.42041800 |
| C | -0.67594700 | 3.78252200  | 0.12523400  |
| H | -0.52261700 | 4.59800400  | 0.84169400  |
| H | -1.29753700 | 4.17871600  | -0.68472300 |
| H | -1.23965200 | 2.99424900  | 0.63950500  |

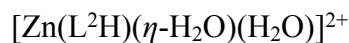

|    |             |             |             |
|----|-------------|-------------|-------------|
| Zn | 0.58836300  | 0.40210300  | 0.53145100  |
| N  | 2.51912600  | -0.06374100 | -0.18837500 |
| N  | 0.06795900  | -0.86871600 | -1.13756500 |
| N  | -0.37614300 | 1.83452400  | -0.56249200 |
| O  | -0.75503200 | -0.72376900 | 1.73449700  |
| O  | -2.66207000 | 0.08728700  | 0.80396000  |
| C  | 3.68001300  | 0.60952700  | 0.01819400  |
| C  | 4.88938400  | 0.10971300  | -0.47280300 |
| H  | 5.80511600  | 0.66383200  | -0.29404200 |
| C  | 4.90439200  | -1.07386700 | -1.20482700 |
| H  | 5.83780200  | -1.47021700 | -1.59261200 |
| C  | 3.69622400  | -1.71919700 | -1.47053100 |
| H  | 3.66189800  | -2.61441100 | -2.08327700 |
| C  | 2.52262200  | -1.18621600 | -0.95164200 |
| C  | 1.18277100  | -1.83579900 | -1.24962800 |
| H  | 1.20977600  | -2.28876000 | -2.25086800 |
| H  | 1.00430300  | -2.64401700 | -0.53992700 |
| C  | 0.14009000  | 0.13943100  | -2.23882100 |
| H  | -0.29357500 | -0.26412300 | -3.16189400 |
| H  | 1.19452400  | 0.35005900  | -2.44373600 |

|   |             |             |             |
|---|-------------|-------------|-------------|
| C | -0.54304500 | 1.43459200  | -1.84585600 |
| C | -1.27022100 | 2.19058300  | -2.75576200 |
| H | -1.39338700 | 1.84502900  | -3.77698600 |
| C | -1.83292800 | 3.39492800  | -2.32727600 |
| H | -2.40228500 | 4.01035900  | -3.01715400 |
| C | -1.66931500 | 3.79003100  | -1.00174400 |
| H | -2.10929700 | 4.71257900  | -0.63901600 |
| C | -0.94132400 | 2.98321500  | -0.12387800 |
| C | -1.28091200 | -1.52239800 | -1.18048000 |
| H | -1.27036100 | -2.28313200 | -1.97355500 |
| H | -1.97536300 | -0.73937900 | -1.49129100 |
| C | -1.86739200 | -2.15434700 | 0.10303700  |
| C | -2.04022200 | -1.11182900 | 1.22442000  |
| H | -2.59778600 | -1.56571300 | 2.05382000  |
| C | -3.28412800 | -2.64142900 | -0.28969700 |
| H | -3.22104800 | -3.43334600 | -1.04227500 |
| H | -3.89831200 | -1.83616200 | -0.70757100 |
| H | -3.80583200 | -3.06058200 | 0.57762700  |
| C | -1.07912200 | -3.35777000 | 0.65536800  |
| H | -0.11382300 | -3.07194500 | 1.08085500  |
| H | -0.91763900 | -4.10468100 | -0.12896100 |
| H | -1.64715800 | -3.84786300 | 1.45409500  |
| H | -3.62583400 | 0.02748400  | 0.91222100  |
| O | 1.26552500  | 1.06626800  | 2.45516100  |
| H | 2.18982000  | 0.93470500  | 2.71862900  |
| H | -0.87036200 | -0.37653700 | 2.64553900  |
| H | 0.70938800  | 0.94786200  | 3.25914300  |
| C | 3.64691300  | 1.92627800  | 0.75034600  |
| H | 2.64298900  | 2.35638800  | 0.77141200  |
| H | 4.01311100  | 1.82535000  | 1.78109700  |
| H | 4.31185000  | 2.64531200  | 0.26264600  |
| C | -0.78590400 | 3.31868300  | 1.33206200  |
| H | -1.33187800 | 2.57946200  | 1.93270300  |
| H | 0.26464200  | 3.28896300  | 1.63704200  |
| H | -1.18763900 | 4.30820400  | 1.55977900  |
| O | -0.68848700 | 0.40501200  | 4.30211200  |
| H | -0.50694400 | -0.17396900 | 5.06410500  |
| H | -1.30833100 | 1.08125900  | 4.62802900  |

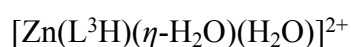

|    |             |             |             |
|----|-------------|-------------|-------------|
| Zn | -0.18405000 | -0.16935800 | 0.71650400  |
| N  | -2.13467400 | 0.06202200  | -0.10086500 |
| N  | 0.27701800  | 0.84194700  | -1.14446000 |



|   |             |             |             |
|---|-------------|-------------|-------------|
| N | 1.02832300  | -1.64463600 | -0.20532000 |
| C | -3.27722600 | -0.60576400 | 0.20347400  |
| C | -4.49472500 | -0.24286200 | -0.37868400 |
| H | -5.39362000 | -0.79011600 | -0.11599300 |
| C | -4.54158300 | 0.79983800  | -1.29937000 |
| H | -5.48170200 | 1.08744100  | -1.75991000 |
| C | -3.35536400 | 1.44678200  | -1.64387100 |
| H | -3.34273100 | 2.23936300  | -2.38517900 |
| C | -2.17464500 | 1.05375900  | -1.02603500 |
| C | -0.86580900 | 1.74597500  | -1.36162200 |
| H | -0.89265900 | 2.13482600  | -2.38862900 |
| H | -0.75439800 | 2.60145400  | -0.69255000 |
| C | 0.27617700  | -0.28814600 | -2.10346400 |
| H | 0.69139800  | 0.01540500  | -3.07354500 |
| H | -0.76187000 | -0.58942400 | -2.27676700 |
| C | 1.04543800  | -1.47242600 | -1.55187200 |
| C | 1.72411600  | -2.33664500 | -2.40183700 |
| H | 1.71978100  | -2.15959800 | -3.47251000 |
| C | 2.41282300  | -3.41754700 | -1.85200100 |
| H | 2.95033800  | -4.11238700 | -2.48996000 |
| C | 2.42667600  | -3.57169800 | -0.46886900 |
| H | 2.98252600  | -4.38126300 | -0.00797900 |
| C | 1.73479700  | -2.66756400 | 0.34208900  |
| C | 1.62089900  | 1.47936000  | -1.12835900 |
| H | 1.86961600  | 1.83778300  | -2.13725500 |
| H | 2.31837200  | 0.66865100  | -0.90092800 |
| C | 1.87564300  | 2.64758100  | -0.13960700 |
| C | 3.39087000  | 2.61524300  | 0.22465500  |
| H | 3.98604800  | 2.69078700  | -0.69189000 |
| H | 3.65928400  | 1.68612100  | 0.73868100  |
| H | 3.66089700  | 3.45972800  | 0.86582900  |
| C | 1.58444400  | 4.02859900  | -0.78976800 |
| H | 0.54282900  | 4.15221400  | -1.09685900 |
| H | 2.21330000  | 4.14999500  | -1.67686600 |
| H | 1.82759500  | 4.84300600  | -0.10028600 |
| C | 1.14437900  | 2.58580700  | 1.17425500  |
| H | 1.16887500  | 3.49539200  | 1.77825400  |
| N | 0.52267300  | 1.58421600  | 1.68406000  |
| O | -0.10981800 | 1.95256000  | 2.89087300  |
| O | -0.65442700 | -1.03819300 | 2.60124800  |
| H | -0.14611300 | -0.86733200 | 3.42869300  |
| H | -0.99706700 | -1.94297500 | 2.66045000  |
| H | 0.12460400  | 1.26782000  | 3.55384100  |
| C | 1.77770200  | -2.80643100 | 1.83995900  |

|   |             |             |            |
|---|-------------|-------------|------------|
| H | 1.81755300  | -1.82731200 | 2.32402800 |
| H | 0.89533400  | -3.34057500 | 2.21275300 |
| H | 2.65433700  | -3.38131900 | 2.14792700 |
| C | -3.20774100 | -1.75957200 | 1.16542900 |
| H | -2.32913400 | -2.38144400 | 0.95445000 |
| H | -3.15824800 | -1.39722900 | 2.19805000 |
| H | -4.09182500 | -2.39465600 | 1.07651000 |
| O | 0.57276200  | -0.03869400 | 4.81998800 |
| H | 1.49203800  | -0.09410800 | 5.13445100 |
| H | 0.02370500  | 0.04206000  | 5.62074200 |

[Zn(L<sup>1</sup>)( $\eta$ -H<sub>2</sub>O)(H<sub>2</sub>O)]<sup>+</sup>

|    |             |             |             |
|----|-------------|-------------|-------------|
| Zn | 0.49900700  | 0.32822200  | 0.65659700  |
| N  | 2.46222200  | -0.01330300 | -0.24452200 |
| N  | 0.05908400  | -0.90626100 | -1.14199900 |
| N  | -0.26570000 | 1.83299400  | -0.58475800 |
| O  | -1.05908500 | -0.11973500 | 1.68511400  |
| C  | 3.58747000  | 0.71871300  | -0.05867400 |
| C  | 4.82404600  | 0.23803300  | -0.49829900 |
| H  | 5.71777200  | 0.83048600  | -0.33360400 |
| C  | 4.89120000  | -0.98440400 | -1.16559400 |
| H  | 5.84600600  | -1.36916200 | -1.51120400 |
| C  | 3.71427700  | -1.68599500 | -1.41958300 |
| H  | 3.72132800  | -2.61449700 | -1.98184700 |
| C  | 2.51271100  | -1.16458500 | -0.94532000 |
| C  | 1.18776200  | -1.85157300 | -1.23001900 |
| H  | 1.23183500  | -2.33241700 | -2.21978700 |
| H  | 1.02024400  | -2.64627700 | -0.49967300 |
| C  | 0.11627000  | 0.09289500  | -2.24199400 |
| H  | -0.35076200 | -0.30069800 | -3.15445500 |
| H  | 1.16676400  | 0.28777200  | -2.47888300 |
| C  | -0.52098000 | 1.41030500  | -1.84019000 |
| C  | -1.29333200 | 2.16511000  | -2.71681800 |
| H  | -1.49351400 | 1.80274300  | -3.71997800 |
| C  | -1.80351600 | 3.38746600  | -2.27361700 |
| H  | -2.40873800 | 3.99963600  | -2.93555100 |
| C  | -1.54501100 | 3.80626800  | -0.97062200 |
| H  | -1.94480200 | 4.74248200  | -0.59620000 |
| C  | -0.77510100 | 2.99680600  | -0.12938400 |
| C  | -1.26856100 | -1.60053200 | -1.13748900 |
| H  | -1.19425500 | -2.49326100 | -1.77778400 |
| H  | -1.97132600 | -0.91971600 | -1.62835000 |
| C  | -1.88421800 | -1.97514000 | 0.23025000  |
| C  | -2.18124100 | -0.70029600 | 1.06760100  |

|                                                                                 |             |             |             |
|---------------------------------------------------------------------------------|-------------|-------------|-------------|
| H                                                                               | -2.90231900 | -0.97595500 | 1.85211000  |
| C                                                                               | -3.23079400 | -2.65561500 | -0.09193800 |
| H                                                                               | -3.09151300 | -3.54265200 | -0.72099300 |
| H                                                                               | -3.91163800 | -1.97323700 | -0.61633100 |
| H                                                                               | -3.72614600 | -2.97773100 | 0.82981700  |
| C                                                                               | -1.00747600 | -2.93666200 | 1.04590200  |
| H                                                                               | -0.07711200 | -2.46010000 | 1.37281600  |
| H                                                                               | -0.76897200 | -3.84427000 | 0.47758300  |
| H                                                                               | -1.53338100 | -3.24261200 | 1.95670100  |
| O                                                                               | 1.57586100  | 0.52638300  | 2.52095700  |
| H                                                                               | 2.40318700  | 0.02411100  | 2.58852700  |
| H                                                                               | -0.74989600 | -0.46594700 | 3.20465300  |
| C                                                                               | 3.44138400  | 2.08912700  | 0.54826200  |
| H                                                                               | 2.95783000  | 2.75607900  | -0.17741100 |
| H                                                                               | 2.81791500  | 2.07183400  | 1.44482800  |
| H                                                                               | 4.41484700  | 2.51623400  | 0.80099000  |
| C                                                                               | -0.49784700 | 3.33169400  | 1.30928200  |
| H                                                                               | 0.58146000  | 3.35765400  | 1.49960100  |
| H                                                                               | -0.92450400 | 4.29694300  | 1.59079000  |
| H                                                                               | -0.92264700 | 2.54930500  | 1.95103200  |
| O                                                                               | -0.20434100 | -0.55977400 | 4.05496400  |
| H                                                                               | 0.98141000  | 0.18379300  | 3.26939500  |
| H                                                                               | -0.67328700 | -0.10507600 | 4.77047600  |
| H                                                                               | -2.69091300 | 0.03332300  | 0.41585100  |
| [Zn(L <sup>2</sup> )( $\eta$ -H <sub>2</sub> O)(H <sub>2</sub> O)] <sup>+</sup> |             |             |             |
| Zn                                                                              | 0.42500500  | 0.36090000  | 0.61988300  |
| N                                                                               | 2.45288700  | -0.00576100 | -0.21676300 |
| N                                                                               | 0.05249100  | -0.87666600 | -1.17068500 |
| N                                                                               | -0.30253100 | 1.87060000  | -0.61316800 |
| O                                                                               | -1.09233900 | -0.23448300 | 1.66626800  |
| O                                                                               | -2.87941300 | 0.16084500  | 0.22888900  |
| C                                                                               | 3.58596700  | 0.70220700  | -0.00250700 |
| C                                                                               | 4.82442000  | 0.21769000  | -0.43793900 |
| H                                                                               | 5.72024900  | 0.80145400  | -0.25206300 |
| C                                                                               | 4.88887800  | -0.99157000 | -1.12360500 |
| H                                                                               | 5.84336300  | -1.38042700 | -1.46620300 |
| C                                                                               | 3.70577400  | -1.67420200 | -1.40318600 |
| H                                                                               | 3.70865800  | -2.59213100 | -1.98284100 |
| C                                                                               | 2.50481800  | -1.14690100 | -0.93837000 |
| C                                                                               | 1.18257100  | -1.81950900 | -1.25854200 |
| H                                                                               | 1.23992300  | -2.27856300 | -2.25792000 |
| H                                                                               | 1.00336600  | -2.63015600 | -0.54997600 |
| C                                                                               | 0.12332000  | 0.13107200  | -2.26239500 |
| H                                                                               | -0.32103100 | -0.26297100 | -3.18566200 |

|                                                                                 |             |             |             |
|---------------------------------------------------------------------------------|-------------|-------------|-------------|
| H                                                                               | 1.17732700  | 0.33586700  | -2.47447100 |
| C                                                                               | -0.53425400 | 1.44067600  | -1.87064700 |
| C                                                                               | -1.30737400 | 2.17732800  | -2.76056200 |
| H                                                                               | -1.48844000 | 1.80526900  | -3.76362400 |
| C                                                                               | -1.84953000 | 3.38856600  | -2.32964800 |
| H                                                                               | -2.46079500 | 3.98472900  | -3.00068400 |
| C                                                                               | -1.61505300 | 3.81727600  | -1.02519600 |
| H                                                                               | -2.03759600 | 4.74726300  | -0.65973800 |
| C                                                                               | -0.83954500 | 3.02770800  | -0.17170500 |
| C                                                                               | -1.27162400 | -1.58011600 | -1.20252900 |
| H                                                                               | -1.18329700 | -2.45048800 | -1.87013500 |
| H                                                                               | -1.97762600 | -0.88743100 | -1.66236200 |
| C                                                                               | -1.88759600 | -2.02308700 | 0.14327900  |
| C                                                                               | -2.19794900 | -0.79765100 | 1.05095800  |
| H                                                                               | -2.88760700 | -1.13675700 | 1.84215500  |
| C                                                                               | -3.21756800 | -2.72219100 | -0.21141600 |
| H                                                                               | -3.04118200 | -3.61178600 | -0.82747000 |
| H                                                                               | -3.88948700 | -2.04958000 | -0.75252900 |
| H                                                                               | -3.72974600 | -3.04910200 | 0.69988700  |
| C                                                                               | -1.00551100 | -2.99898300 | 0.93757200  |
| H                                                                               | -0.07724200 | -2.53101600 | 1.27998600  |
| H                                                                               | -0.76724200 | -3.88848500 | 0.34205400  |
| H                                                                               | -1.53350800 | -3.33664800 | 1.83635200  |
| H                                                                               | -3.15235000 | 0.89305100  | 0.80265500  |
| O                                                                               | 1.40726900  | 0.82752600  | 2.46970200  |
| H                                                                               | 0.86936600  | 0.43073500  | 3.22870800  |
| C                                                                               | 3.48679100  | 2.04766500  | 0.67096500  |
| H                                                                               | 2.45300900  | 2.39065100  | 0.71924600  |
| H                                                                               | 3.88514100  | 2.02311100  | 1.69237100  |
| H                                                                               | 4.07720000  | 2.78552400  | 0.11806100  |
| C                                                                               | -0.59114800 | 3.38578800  | 1.26765000  |
| H                                                                               | -0.97830100 | 2.59380500  | 1.92044900  |
| H                                                                               | 0.48158100  | 3.46948100  | 1.47311200  |
| H                                                                               | -1.06960700 | 4.33079800  | 1.53496700  |
| O                                                                               | -0.17937400 | -0.47592300 | 4.07154200  |
| H                                                                               | -0.70678600 | -0.09553400 | 4.78950600  |
| H                                                                               | -0.74788700 | -0.50323700 | 3.24163700  |
| H                                                                               | 2.30201900  | 0.46878300  | 2.57103100  |
| [Zn(L <sup>3</sup> )( $\eta$ -H <sub>2</sub> O)(H <sub>2</sub> O)] <sup>+</sup> |             |             |             |
| Zn                                                                              | -1.45743300 | -0.40424000 | -0.00885000 |
| N                                                                               | -1.65924600 | -0.32423800 | -2.17253900 |
| N                                                                               | -3.61672900 | -0.84598900 | -0.34091000 |
| N                                                                               | -2.15950800 | 1.48318000  | 0.54962800  |
| C                                                                               | -0.78989900 | 0.27015700  | -3.02601900 |

|   |             |             |             |
|---|-------------|-------------|-------------|
| C | -0.96036200 | 0.14717800  | -4.40816000 |
| H | -0.25388100 | 0.62701500  | -5.07694500 |
| C | -2.04294100 | -0.57107300 | -4.91098900 |
| H | -2.18589700 | -0.67190800 | -5.98267400 |
| C | -2.95949700 | -1.12777500 | -4.02092800 |
| H | -3.83896900 | -1.65716300 | -4.37409400 |
| C | -2.73384800 | -0.97985100 | -2.65487000 |
| C | -3.71190900 | -1.54308700 | -1.63958600 |
| H | -4.73438100 | -1.48587100 | -2.04315500 |
| H | -3.49873400 | -2.60101400 | -1.47766500 |
| C | -4.16779000 | 0.53336600  | -0.46422100 |
| H | -5.25629000 | 0.52848600  | -0.32468100 |
| H | -3.97713700 | 0.87715300  | -1.48606300 |
| C | -3.51322400 | 1.52648500  | 0.47577300  |
| C | -4.25156000 | 2.48068800  | 1.15862900  |
| H | -5.33438500 | 2.48778600  | 1.08827100  |
| C | -3.56964500 | 3.43048600  | 1.92828000  |
| H | -4.12048600 | 4.18875900  | 2.47660700  |
| C | -2.18405500 | 3.39104700  | 1.98126600  |
| H | -1.62631100 | 4.11422800  | 2.56702800  |
| C | -1.48732600 | 2.39070300  | 1.28599300  |
| C | -4.30156900 | -1.60397700 | 0.74902900  |
| H | -5.16709800 | -2.12991000 | 0.31931100  |
| H | -4.69226000 | -0.86625700 | 1.45509600  |
| C | -3.43228800 | -2.60236900 | 1.56540300  |
| C | -4.40182900 | -3.35873500 | 2.49877000  |
| H | -5.12069500 | -3.95133200 | 1.92265100  |
| H | -4.96155200 | -2.66709400 | 3.13908200  |
| H | -3.84787400 | -4.04278800 | 3.14992900  |
| C | -2.69451300 | -3.63179300 | 0.68188000  |
| H | -1.96234700 | -3.15505100 | 0.01905100  |
| H | -3.39650300 | -4.21326600 | 0.07147200  |
| H | -2.14215400 | -4.33311000 | 1.31498800  |
| C | -2.44033800 | -1.84836900 | 2.43437000  |
| H | -2.48716500 | -1.93460400 | 3.52123500  |
| N | -1.52804700 | -1.08285900 | 1.93841400  |
| O | -0.73022000 | -0.40881200 | 2.76702800  |
| C | 0.00923600  | 2.30676100  | 1.35907900  |
| H | 0.31326800  | 1.95832500  | 2.34985800  |
| H | 0.41589200  | 1.60000900  | 0.63287600  |
| H | 0.46086900  | 3.28902400  | 1.18254300  |
| C | 0.32342000  | 1.09034200  | -2.43791400 |
| H | -0.08112000 | 1.79685000  | -1.70443700 |
| H | 1.04046600  | 0.44975200  | -1.91703600 |

|   |            |             |             |
|---|------------|-------------|-------------|
| H | 0.84646200 | 1.65702900  | -3.21160800 |
| H | 1.08668000 | -0.99452600 | 0.49329300  |
| O | 0.49507800 | -1.16058500 | -0.33171900 |
| H | 0.52639900 | -2.11474100 | -0.50633000 |
| O | 1.64890400 | -0.49098100 | 1.83504200  |
| H | 0.74075500 | -0.45899900 | 2.31953000  |
| H | 2.25234600 | -1.03973100 | 2.35765600  |

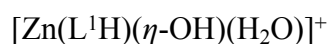

|    |             |             |             |
|----|-------------|-------------|-------------|
| Zn | 0.57656800  | 0.40648900  | 0.65834100  |
| N  | 2.53311100  | 0.03951500  | -0.35512000 |
| N  | 0.07157300  | -0.86411500 | -1.09357400 |
| N  | -0.27817500 | 1.86942600  | -0.53137400 |
| O  | -1.41333300 | 0.09266500  | 1.52114900  |
| C  | 3.67760000  | 0.72794200  | -0.14652700 |
| C  | 4.89891900  | 0.22419000  | -0.60323600 |
| H  | 5.81131900  | 0.78367100  | -0.42560600 |
| C  | 4.92678700  | -0.98715300 | -1.29401100 |
| H  | 5.86816900  | -1.38975100 | -1.65585400 |
| C  | 3.73268200  | -1.66615400 | -1.53326300 |
| H  | 3.71560700  | -2.59839700 | -2.08937100 |
| C  | 2.55094300  | -1.11627100 | -1.04081500 |
| C  | 1.21080900  | -1.79874000 | -1.25288500 |
| H  | 1.18942900  | -2.27194000 | -2.24656200 |
| H  | 1.09115300  | -2.59792900 | -0.51750200 |
| C  | 0.08038300  | 0.14037100  | -2.19702300 |
| H  | -0.40459900 | -0.26351000 | -3.09468300 |
| H  | 1.12077700  | 0.34973100  | -2.46117900 |
| C  | -0.55903500 | 1.45007000  | -1.78171200 |
| C  | -1.33955800 | 2.21058800  | -2.64495400 |
| H  | -1.55906800 | 1.85117700  | -3.64513100 |
| C  | -1.82505100 | 3.44059700  | -2.19379500 |
| H  | -2.43375900 | 4.06024500  | -2.84550800 |
| C  | -1.53195000 | 3.86025800  | -0.89888100 |
| H  | -1.90698400 | 4.80532900  | -0.52111100 |
| C  | -0.75856500 | 3.04233500  | -0.06799600 |
| C  | -1.23522200 | -1.60422100 | -1.09727900 |
| H  | -1.11638700 | -2.49315800 | -1.73346000 |
| H  | -1.96091700 | -0.95766400 | -1.60046900 |
| C  | -1.85672200 | -2.01568600 | 0.25882200  |
| C  | -2.41929000 | -0.77961800 | 0.99142800  |
| H  | -3.06182100 | -1.10665400 | 1.81706200  |
| C  | -3.06138600 | -2.91962200 | -0.08239900 |
| H  | -2.73703900 | -3.82318100 | -0.60996900 |

|                                                                    |             |             |             |
|--------------------------------------------------------------------|-------------|-------------|-------------|
| H                                                                  | -3.79191800 | -2.40187800 | -0.71633100 |
| H                                                                  | -3.57487200 | -3.23616500 | 0.83119900  |
| C                                                                  | -0.88612100 | -2.78079200 | 1.17216800  |
| H                                                                  | -0.01977700 | -2.17746800 | 1.46353900  |
| H                                                                  | -0.53193700 | -3.69900000 | 0.68909000  |
| H                                                                  | -1.38795100 | -3.06690600 | 2.10225800  |
| O                                                                  | 1.31556300  | 0.41116000  | 2.41349100  |
| H                                                                  | 2.19016800  | -0.00071300 | 2.47327100  |
| H                                                                  | -1.25667200 | -0.13380600 | 2.48426000  |
| C                                                                  | 3.55835900  | 2.05718300  | 0.54895400  |
| H                                                                  | 3.08057900  | 2.78393800  | -0.12099800 |
| H                                                                  | 2.93039200  | 1.97015700  | 1.44163100  |
| H                                                                  | 4.53730900  | 2.45088200  | 0.83293300  |
| C                                                                  | -0.45942800 | 3.37846600  | 1.36489100  |
| H                                                                  | -1.04201600 | 2.71819400  | 2.01889200  |
| H                                                                  | 0.59621100  | 3.20295500  | 1.59779100  |
| H                                                                  | -0.70971300 | 4.41595500  | 1.59765400  |
| O                                                                  | -0.57394200 | -0.55164500 | 3.91527400  |
| H                                                                  | 0.28839500  | -0.18637200 | 3.54180600  |
| H                                                                  | -0.76517300 | -0.07774800 | 4.73817900  |
| H                                                                  | -3.03379500 | -0.18411500 | 0.30544000  |
| [Zn(L <sup>2</sup> H)( $\eta$ -OH)(H <sub>2</sub> O)] <sup>+</sup> |             |             |             |
| Zn                                                                 | 0.59407800  | 0.40167700  | 0.63890300  |
| N                                                                  | 2.54707500  | 0.02570900  | -0.34937500 |
| N                                                                  | 0.07960100  | -0.86634000 | -1.10386300 |
| N                                                                  | -0.25550500 | 1.87322200  | -0.53361500 |
| O                                                                  | -1.43417600 | 0.09448000  | 1.49796200  |
| O                                                                  | -3.20366400 | -0.02651600 | 0.03944500  |
| C                                                                  | 3.69257000  | 0.71045200  | -0.13413200 |
| C                                                                  | 4.91138500  | 0.21487600  | -0.60584500 |
| H                                                                  | 5.82471900  | 0.77101200  | -0.42274200 |
| C                                                                  | 4.93545000  | -0.98375500 | -1.31854400 |
| H                                                                  | 5.87485400  | -1.37958900 | -1.69273100 |
| C                                                                  | 3.74015500  | -1.65863300 | -1.56336100 |
| H                                                                  | 3.72017600  | -2.58079200 | -2.13588200 |
| C                                                                  | 2.56077900  | -1.11832600 | -1.05505100 |
| C                                                                  | 1.22007800  | -1.79839700 | -1.26883400 |
| H                                                                  | 1.19789500  | -2.26811400 | -2.26396600 |
| H                                                                  | 1.10076400  | -2.60065000 | -0.53607200 |
| C                                                                  | 0.08371200  | 0.14591600  | -2.20101300 |
| H                                                                  | -0.39934600 | -0.25445200 | -3.10072300 |
| H                                                                  | 1.12333000  | 0.36334500  | -2.46287300 |
| C                                                                  | -0.56380900 | 1.44733000  | -1.77444600 |
| C                                                                  | -1.38293600 | 2.19087600  | -2.61577200 |

|                                                                    |             |             |             |
|--------------------------------------------------------------------|-------------|-------------|-------------|
| H                                                                  | -1.62636800 | 1.82385100  | -3.60737500 |
| C                                                                  | -1.88304000 | 3.40882400  | -2.15061700 |
| H                                                                  | -2.52592200 | 4.01329700  | -2.78352200 |
| C                                                                  | -1.55939800 | 3.83741100  | -0.86522500 |
| H                                                                  | -1.94109300 | 4.77615400  | -0.47818700 |
| C                                                                  | -0.74341100 | 3.03802200  | -0.05882400 |
| C                                                                  | -1.22655700 | -1.61072800 | -1.11655400 |
| H                                                                  | -1.09316900 | -2.51528200 | -1.72549500 |
| H                                                                  | -1.94864900 | -0.97967500 | -1.63587100 |
| C                                                                  | -1.86177400 | -2.00481000 | 0.23545500  |
| C                                                                  | -2.43881400 | -0.76379500 | 0.95972900  |
| H                                                                  | -3.05911500 | -1.10561000 | 1.80089400  |
| C                                                                  | -3.04657400 | -2.93877200 | -0.09824700 |
| H                                                                  | -2.68959500 | -3.86281300 | -0.56567800 |
| H                                                                  | -3.75844300 | -2.45697600 | -0.77481400 |
| H                                                                  | -3.58302900 | -3.21719700 | 0.81519000  |
| C                                                                  | -0.89656800 | -2.73554200 | 1.18285800  |
| H                                                                  | -0.02426000 | -2.13194400 | 1.45327400  |
| H                                                                  | -0.55147700 | -3.67210200 | 0.73060400  |
| H                                                                  | -1.40006600 | -2.98912900 | 2.12187000  |
| H                                                                  | -3.62878500 | 0.70981000  | 0.50590400  |
| O                                                                  | 1.28816200  | 0.38473900  | 2.41279300  |
| H                                                                  | 2.15170800  | -0.04665800 | 2.49286000  |
| H                                                                  | -1.30297800 | -0.10148800 | 2.47503200  |
| C                                                                  | 3.57669800  | 2.02673300  | 0.58605400  |
| H                                                                  | 3.09170900  | 2.76441000  | -0.06717200 |
| H                                                                  | 2.95561400  | 1.92266200  | 1.48207800  |
| H                                                                  | 4.55748700  | 2.41736800  | 0.86893800  |
| C                                                                  | -0.39701100 | 3.38710600  | 1.36092300  |
| H                                                                  | -0.89814800 | 2.68833200  | 2.04145800  |
| H                                                                  | 0.67881100  | 3.28316500  | 1.53736300  |
| H                                                                  | -0.70194900 | 4.40519700  | 1.61315000  |
| O                                                                  | -0.64476800 | -0.46751700 | 3.91697800  |
| H                                                                  | 0.23391700  | -0.14571200 | 3.53731700  |
| H                                                                  | -0.82106900 | 0.03426500  | 4.72654800  |
| [Zn(L <sup>3</sup> H)( $\eta$ -OH)(H <sub>2</sub> O)] <sup>+</sup> |             |             |             |
| Zn                                                                 | -0.29631500 | -0.20562100 | 0.84978600  |
| N                                                                  | -2.29591300 | 0.17258800  | -0.12862200 |
| N                                                                  | 0.21979600  | 0.76831600  | -1.09739700 |
| N                                                                  | 1.12710500  | -1.61463000 | -0.13499500 |
| C                                                                  | -3.49650200 | -0.37053700 | 0.19268200  |
| C                                                                  | -4.65781400 | 0.00861700  | -0.49470800 |
| H                                                                  | -5.60680400 | -0.43449900 | -0.21256300 |
| C                                                                  | -4.58592300 | 0.93183000  | -1.53121700 |



|   |             |             |             |
|---|-------------|-------------|-------------|
| H | -5.47968800 | 1.22396900  | -2.07437300 |
| C | -3.34384700 | 1.46832400  | -1.86691400 |
| H | -3.23753400 | 2.18565600  | -2.67456400 |
| C | -2.23075900 | 1.07019000  | -1.13490200 |
| C | -0.87791200 | 1.69529400  | -1.40088500 |
| H | -0.82254700 | 2.07212800  | -2.43304300 |
| H | -0.78195000 | 2.55269400  | -0.73229200 |
| C | 0.23572100  | -0.38046900 | -2.02873000 |
| H | 0.59663000  | -0.08019800 | -3.02366600 |
| H | -0.79485500 | -0.73123400 | -2.14746600 |
| C | 1.08655500  | -1.50917900 | -1.48014300 |
| C | 1.78632300  | -2.36821600 | -2.31831100 |
| H | 1.73439000  | -2.24582700 | -3.39556000 |
| C | 2.56315300  | -3.37290700 | -1.73818800 |
| H | 3.12308200  | -4.06426900 | -2.36082700 |
| C | 2.63660300  | -3.45392500 | -0.35211900 |
| H | 3.26242500  | -4.19892200 | 0.12845300  |
| C | 1.91147400  | -2.55317300 | 0.44100500  |
| C | 1.56683100  | 1.39390700  | -1.05927100 |
| H | 1.86188200  | 1.68700700  | -2.07898400 |
| H | 2.24597300  | 0.59761600  | -0.74926300 |
| C | 1.80462200  | 2.61652900  | -0.13453500 |
| C | 3.31874900  | 2.60259200  | 0.22811400  |
| H | 3.91999400  | 2.62317300  | -0.68823300 |
| H | 3.58145700  | 1.70641500  | 0.79963000  |
| H | 3.58658800  | 3.48096800  | 0.82359000  |
| C | 1.51997200  | 3.96197600  | -0.85291900 |
| H | 0.47882700  | 4.07725000  | -1.16343500 |
| H | 2.14855200  | 4.04196700  | -1.74575400 |
| H | 1.76502000  | 4.80566100  | -0.19960000 |
| C | 1.07331800  | 2.60472900  | 1.18381700  |
| H | 1.13920800  | 3.51760000  | 1.77994100  |
| N | 0.44129800  | 1.62083200  | 1.70633300  |
| O | -0.12074000 | 1.95380900  | 2.93574300  |
| O | -0.77337700 | -1.23666800 | 2.38481100  |
| H | -0.81331200 | -2.19151300 | 2.23342400  |
| H | 0.05967800  | 1.16005100  | 3.53491100  |
| C | 2.01126500  | -2.60294700 | 1.94192400  |
| H | 1.77474200  | -1.64106300 | 2.39788000  |
| H | 1.31099400  | -3.33994400 | 2.35430600  |
| H | 3.01676200  | -2.91032000 | 2.24483700  |
| C | -3.56082400 | -1.40370800 | 1.27992200  |
| H | -3.10832000 | -2.34186600 | 0.93302100  |
| H | -2.98928000 | -1.08703900 | 2.15467000  |

|                                                                        |             |             |             |
|------------------------------------------------------------------------|-------------|-------------|-------------|
| H                                                                      | -4.59742300 | -1.61178300 | 1.55587000  |
| O                                                                      | 0.48728300  | -0.18888300 | 4.34144800  |
| H                                                                      | -0.04803300 | -0.78058000 | 3.72036800  |
| H                                                                      | 0.12380600  | -0.27517300 | 5.23533600  |
| [Zn <sub>2</sub> (L <sup>1</sup> H) <sub>2</sub> (μ-OH)] <sup>3+</sup> |             |             |             |
| Zn                                                                     | -0.01956600 | -0.54888700 | 0.83143400  |
| N                                                                      | -2.13728900 | -0.67204800 | 0.36286700  |
| N                                                                      | -0.29500300 | 1.20353400  | -0.41277900 |
| N                                                                      | 1.03872900  | -1.23462800 | -0.80042300 |
| O                                                                      | 1.75778500  | 0.21283300  | 1.79562900  |
| C                                                                      | -2.94870400 | -1.75242200 | 0.47078000  |
| C                                                                      | -4.32950800 | -1.62261500 | 0.29808900  |
| H                                                                      | -4.96613800 | -2.49708400 | 0.38437800  |
| C                                                                      | -4.86952300 | -0.37641900 | -0.01798200 |
| H                                                                      | -5.93889300 | -0.26340300 | -0.16953700 |
| C                                                                      | -4.01715000 | 0.71843200  | -0.16990800 |
| H                                                                      | -4.40251900 | 1.69374300  | -0.45077000 |
| C                                                                      | -2.65243200 | 0.53290300  | 0.03062000  |
| C                                                                      | -1.67163400 | 1.68350400  | -0.12913500 |
| H                                                                      | -2.02004900 | 2.35464100  | -0.92678200 |
| H                                                                      | -1.64288500 | 2.27369000  | 0.78979200  |
| C                                                                      | -0.25418000 | 0.58379000  | -1.77531000 |
| H                                                                      | -0.14912500 | 1.35519200  | -2.54698900 |
| H                                                                      | -1.20989800 | 0.08170400  | -1.95345000 |
| C                                                                      | 0.84451100  | -0.45105400 | -1.88886000 |
| C                                                                      | 1.56907700  | -0.63715100 | -3.05960300 |
| H                                                                      | 1.39796700  | 0.00665000  | -3.91634400 |
| C                                                                      | 2.50769200  | -1.67106800 | -3.11093900 |
| H                                                                      | 3.08359900  | -1.84465200 | -4.01489000 |
| C                                                                      | 2.69960500  | -2.47366900 | -1.98803200 |
| H                                                                      | 3.42412600  | -3.28105500 | -2.00000800 |
| C                                                                      | 1.95513900  | -2.22790200 | -0.83210200 |
| C                                                                      | 0.71144100  | 2.32254800  | -0.35216500 |
| H                                                                      | 0.21055000  | 3.24655700  | -0.66930500 |
| H                                                                      | 1.46756900  | 2.10352900  | -1.11165000 |
| C                                                                      | 1.45879500  | 2.57381300  | 0.97856100  |
| C                                                                      | 2.42238000  | 1.41686400  | 1.30834200  |
| H                                                                      | 2.97852500  | 1.09647100  | 0.42375400  |
| H                                                                      | 3.14544100  | 1.72711000  | 2.06914500  |
| O                                                                      | -0.45687700 | -1.12402800 | 2.71273800  |
| H                                                                      | -1.41697000 | -1.23413300 | 2.64208700  |
| H                                                                      | 1.56568000  | 0.30614600  | 2.74294600  |
| C                                                                      | 2.15595100  | -3.01805400 | 0.43112000  |
| H                                                                      | 2.86623100  | -2.49365400 | 1.08540600  |

|    |             |             |             |
|----|-------------|-------------|-------------|
| H  | 1.20696700  | -3.14189900 | 0.96445900  |
| H  | 2.56544600  | -4.00991600 | 0.22442500  |
| C  | -2.30779700 | -3.09608800 | 0.70828100  |
| H  | -2.01713200 | -3.54353400 | -0.25090600 |
| H  | -1.40505400 | -3.01382800 | 1.32157300  |
| H  | -3.00214200 | -3.78733200 | 1.19381300  |
| Zn | -0.19169300 | -1.62114000 | 4.64719600  |
| N  | -2.33481800 | -1.95664200 | 4.79115300  |
| N  | -0.27164500 | -3.40862900 | 5.86541200  |
| N  | 0.43084000  | -0.74651500 | 6.40866900  |
| O  | 1.83958100  | -1.95628400 | 3.98507400  |
| C  | -3.33232600 | -1.06983800 | 4.55539500  |
| C  | -4.66573300 | -1.48902200 | 4.54152100  |
| H  | -5.45388100 | -0.76689100 | 4.35488500  |
| C  | -4.97031800 | -2.82443600 | 4.80223500  |
| H  | -6.00264500 | -3.16138600 | 4.80922900  |
| C  | -3.93579100 | -3.71762900 | 5.08662500  |
| H  | -4.14264100 | -4.75539500 | 5.32919600  |
| C  | -2.62631800 | -3.24687400 | 5.07050500  |
| C  | -1.45640400 | -4.16564200 | 5.38463900  |
| H  | -1.76632200 | -4.91345000 | 6.12786400  |
| H  | -1.16544100 | -4.71422200 | 4.48563500  |
| C  | -0.56711900 | -2.81770600 | 7.20928700  |
| H  | -0.41404000 | -3.56117600 | 8.00001200  |
| H  | -1.62393800 | -2.53576100 | 7.23679700  |
| C  | 0.25342300  | -1.57252900 | 7.46812600  |
| C  | 0.73913300  | -1.25369600 | 8.73019500  |
| H  | 0.58842300  | -1.93438400 | 9.56189500  |
| C  | 1.41032400  | -0.04036900 | 8.90418000  |
| H  | 1.79485800  | 0.23854800  | 9.88053900  |
| C  | 1.58359100  | 0.80570200  | 7.81061500  |
| H  | 2.10269400  | 1.75227800  | 7.91791200  |
| C  | 1.09051700  | 0.42344400  | 6.56093800  |
| C  | 0.94688100  | -4.28843900 | 5.97387600  |
| H  | 0.60995100  | -5.30449700 | 6.21750500  |
| H  | 1.51235800  | -3.93322200 | 6.84016200  |
| C  | 1.92779300  | -4.34396300 | 4.77957400  |
| C  | 2.65910600  | -3.00005200 | 4.59081700  |
| H  | 2.98236200  | -2.58624000 | 5.54926900  |
| H  | 3.54513500  | -3.13245900 | 3.96219100  |
| H  | 1.82806100  | -2.06833700 | 3.02061600  |
| C  | 1.29591300  | 1.26220300  | 5.33023100  |
| H  | 1.42990300  | 2.31752400  | 5.58061400  |
| H  | 2.19932000  | 0.92805900  | 4.80132200  |

|                                                           |             |             |             |
|-----------------------------------------------------------|-------------|-------------|-------------|
| H                                                         | 0.43652600  | 1.17538900  | 4.65608200  |
| C                                                         | -2.96297900 | 0.38161400  | 4.38341700  |
| H                                                         | -2.92913700 | 0.87506600  | 5.36326600  |
| H                                                         | -1.97888200 | 0.49891700  | 3.91942200  |
| H                                                         | -3.70358300 | 0.91093000  | 3.77745000  |
| C                                                         | 0.50834000  | 2.83124900  | 2.15841400  |
| H                                                         | 1.07903800  | 3.06419800  | 3.06418700  |
| H                                                         | -0.14002800 | 3.69062300  | 1.95839300  |
| H                                                         | -0.12811600 | 1.96364000  | 2.37559700  |
| C                                                         | 2.33929500  | 3.82368500  | 0.74391000  |
| H                                                         | 1.72472500  | 4.69055400  | 0.48125700  |
| H                                                         | 2.89998600  | 4.07946200  | 1.64881600  |
| H                                                         | 3.06165600  | 3.66658400  | -0.06549400 |
| C                                                         | 1.25020100  | -4.77695000 | 3.46979000  |
| H                                                         | 1.99128700  | -4.86324200 | 2.66746700  |
| H                                                         | 0.78021500  | -5.75989400 | 3.57924300  |
| H                                                         | 0.48239700  | -4.06407900 | 3.14236700  |
| C                                                         | 3.00978300  | -5.37988700 | 5.16541500  |
| H                                                         | 2.56288100  | -6.36281900 | 5.34479100  |
| H                                                         | 3.74341500  | -5.49337100 | 4.36074700  |
| H                                                         | 3.54953300  | -5.08591600 | 6.07305100  |
| $[\text{Zn}_2(\text{L}^2\text{H})_2(\mu\text{-OH})]^{3+}$ |             |             |             |
| Zn                                                        | 2.65624600  | -1.86049000 | -0.64072900 |
| N                                                         | 0.69037800  | -1.19028200 | -0.10856700 |
| N                                                         | 2.17058000  | -3.25822900 | 0.93912500  |
| N                                                         | 3.92597000  | -1.03354500 | 0.75923400  |
| O                                                         | 5.39054100  | -5.18236700 | -1.71332900 |
| O                                                         | 4.32493600  | -3.26095800 | -1.21774600 |
| C                                                         | 0.15223900  | 0.03217800  | -0.31105800 |
| C                                                         | -1.14004800 | 0.32607200  | 0.13790300  |
| H                                                         | -1.54787300 | 1.31853600  | -0.02326800 |
| C                                                         | -1.87906400 | -0.65071200 | 0.79646300  |
| H                                                         | -2.88101100 | -0.43592500 | 1.15575400  |
| C                                                         | -1.30104100 | -1.90344000 | 1.02372600  |
| H                                                         | -1.83400300 | -2.67499700 | 1.57048100  |
| C                                                         | -0.01181300 | -2.13314800 | 0.56286500  |
| C                                                         | 0.69783700  | -3.44847700 | 0.81969000  |
| H                                                         | 0.29369600  | -3.91700100 | 1.72710600  |
| H                                                         | 0.51785400  | -4.13827100 | -0.00875400 |
| C                                                         | 2.47635500  | -2.42177500 | 2.14642500  |
| H                                                         | 2.53484800  | -3.04789900 | 3.04356800  |
| H                                                         | 1.64479600  | -1.72781900 | 2.30039300  |
| C                                                         | 3.73523700  | -1.59448000 | 1.97865600  |
| C                                                         | 4.60000700  | -1.34796100 | 3.03708200  |

|    |             |             |             |
|----|-------------|-------------|-------------|
| H  | 4.42965500  | -1.81169100 | 4.00340300  |
| C  | 5.68094600  | -0.48481700 | 2.83264300  |
| H  | 6.37200000  | -0.27063000 | 3.64231600  |
| C  | 5.86242100  | 0.09547000  | 1.58010300  |
| H  | 6.69126700  | 0.77130800  | 1.39650200  |
| C  | 4.96708100  | -0.19736200 | 0.54607500  |
| C  | 2.87440400  | -4.58028300 | 1.06440000  |
| H  | 2.19457900  | -5.27352200 | 1.57534200  |
| H  | 3.71861000  | -4.42563800 | 1.74318000  |
| C  | 3.42746400  | -5.26594800 | -0.20878000 |
| C  | 4.70123400  | -4.52679900 | -0.67301600 |
| H  | 5.37493700  | -4.36845100 | 0.18265300  |
| C  | 3.85501400  | -6.68650700 | 0.22538400  |
| H  | 2.99755500  | -7.24451000 | 0.61333900  |
| H  | 4.61787800  | -6.66174000 | 1.01346000  |
| H  | 4.25226200  | -7.24885500 | -0.62412700 |
| C  | 2.41890900  | -5.36658800 | -1.36233300 |
| H  | 2.06973500  | -4.38451100 | -1.69375400 |
| H  | 1.55244700  | -5.96730800 | -1.06638100 |
| H  | 2.89272500  | -5.85299400 | -2.21996700 |
| H  | 5.12066100  | -2.83842900 | -1.58034000 |
| C  | 0.97148800  | 1.06261100  | -1.03807200 |
| H  | 0.77982400  | 2.06527400  | -0.64566100 |
| H  | 2.04301400  | 0.85976400  | -0.95131000 |
| H  | 0.69630900  | 1.07060900  | -2.09971000 |
| C  | 5.10361100  | 0.42851100  | -0.81716700 |
| H  | 4.60249000  | 1.40511500  | -0.83551300 |
| H  | 6.15350100  | 0.60052600  | -1.07097000 |
| H  | 4.64214600  | -0.18921300 | -1.59514300 |
| Zn | 2.69725900  | -2.25382500 | -4.34553500 |
| N  | 3.83287800  | -3.95334400 | -4.59313300 |
| N  | 1.27687900  | -3.39116700 | -5.49920000 |
| N  | 2.88256900  | -1.10575900 | -6.03439800 |
| O  | -1.40593100 | -0.51432400 | -3.04334600 |
| O  | 0.49644400  | -0.66533000 | -4.29231300 |
| C  | 5.17768300  | -4.04315300 | -4.52849400 |
| C  | 5.82454800  | -5.24171500 | -4.84463600 |
| H  | 6.90713200  | -5.29425100 | -4.79335400 |
| C  | 5.07338000  | -6.34724100 | -5.22669700 |
| H  | 5.56156400  | -7.28385500 | -5.47867600 |
| C  | 3.68125300  | -6.23306500 | -5.31128200 |
| H  | 3.07059900  | -7.06841800 | -5.63878900 |
| C  | 3.09321400  | -5.01700400 | -4.99455800 |
| C  | 1.59614900  | -4.79610100 | -5.10766100 |

|                                                                           |             |             |             |
|---------------------------------------------------------------------------|-------------|-------------|-------------|
| H                                                                         | 1.17146000  | -5.50729900 | -5.82846000 |
| H                                                                         | 1.11939100  | -4.98596200 | -4.14283500 |
| C                                                                         | 1.80579700  | -3.12074600 | -6.87873400 |
| H                                                                         | 1.07891100  | -3.42725600 | -7.63865100 |
| H                                                                         | 2.69666500  | -3.73891200 | -7.02796800 |
| C                                                                         | 2.21939700  | -1.67493800 | -7.06959300 |
| C                                                                         | 2.01453900  | -0.99597400 | -8.26346300 |
| H                                                                         | 1.47850600  | -1.47020100 | -9.07924300 |
| C                                                                         | 2.52307100  | 0.30036300  | -8.39189800 |
| H                                                                         | 2.38108900  | 0.85557900  | -9.31423600 |
| C                                                                         | 3.21310100  | 0.87253200  | -7.32546200 |
| H                                                                         | 3.62122100  | 1.87484000  | -7.40250500 |
| C                                                                         | 3.38205800  | 0.14644300  | -6.14191300 |
| C                                                                         | -0.21346700 | -3.16027700 | -5.49715600 |
| H                                                                         | -0.68309400 | -4.10469600 | -5.79855900 |
| H                                                                         | -0.41751400 | -2.44756500 | -6.30103800 |
| C                                                                         | -0.92202100 | -2.63058600 | -4.21963600 |
| C                                                                         | -0.86330200 | -1.08252800 | -4.21702200 |
| H                                                                         | -1.39850400 | -0.70539100 | -5.09974800 |
| C                                                                         | -2.41451500 | -3.01154400 | -4.35961400 |
| H                                                                         | -2.53915400 | -4.09863100 | -4.33453000 |
| H                                                                         | -2.84308300 | -2.64825500 | -5.30129900 |
| H                                                                         | -2.99912100 | -2.59508500 | -3.53365800 |
| C                                                                         | -0.38856000 | -3.21169800 | -2.90281200 |
| H                                                                         | 0.67371800  | -3.00798900 | -2.75177100 |
| H                                                                         | -0.54827400 | -4.29434000 | -2.86771500 |
| H                                                                         | -0.92836600 | -2.76482000 | -2.06414000 |
| H                                                                         | 0.51971000  | 0.27708100  | -4.52754900 |
| C                                                                         | 5.95757300  | -2.81087100 | -4.15943900 |
| H                                                                         | 6.78520400  | -3.05869700 | -3.48731800 |
| H                                                                         | 6.39621700  | -2.35265900 | -5.05455300 |
| H                                                                         | 5.32093400  | -2.05582600 | -3.68452300 |
| C                                                                         | 4.14225300  | 0.69832600  | -4.96543600 |
| H                                                                         | 5.17880900  | 0.33729300  | -4.98400100 |
| H                                                                         | 4.17675600  | 1.79041800  | -4.99006900 |
| H                                                                         | 3.69570900  | 0.37724300  | -4.01775600 |
| H                                                                         | -2.30656300 | -0.19095600 | -3.20358400 |
| H                                                                         | 6.05239500  | -5.79126400 | -1.34685300 |
| O                                                                         | 2.56382000  | -1.46269400 | -2.57752300 |
| H                                                                         | 1.77909200  | -0.89838800 | -2.70931700 |
| [Zn <sub>2</sub> (L <sup>1</sup> )(L <sup>1</sup> H)(μ-OH)] <sup>2+</sup> |             |             |             |
| Zn                                                                        | -1.63685400 | 0.48067800  | 0.10315300  |
| N                                                                         | -2.99802600 | 2.13959100  | 0.18740200  |
| N                                                                         | -2.99107500 | 0.16157800  | -1.73005300 |

|    |             |             |             |
|----|-------------|-------------|-------------|
| N  | -3.08437300 | -1.17752500 | 0.79304100  |
| O  | -0.40288800 | -1.21290300 | -0.67610200 |
| C  | -3.25096200 | 2.92186700  | 1.25767600  |
| C  | -3.94715200 | 4.12656300  | 1.11006300  |
| H  | -4.13959800 | 4.74451200  | 1.98072700  |
| C  | -4.40071800 | 4.50725700  | -0.15060100 |
| H  | -4.95137500 | 5.43420800  | -0.27970600 |
| C  | -4.15557400 | 3.67377700  | -1.24323300 |
| H  | -4.51227000 | 3.92903800  | -2.23609400 |
| C  | -3.43999300 | 2.49891200  | -1.03604100 |
| C  | -3.10385000 | 1.56604700  | -2.18449300 |
| H  | -3.86473300 | 1.67054500  | -2.97237500 |
| H  | -2.13793500 | 1.85174100  | -2.61292000 |
| C  | -4.27434700 | -0.28631100 | -1.12663400 |
| H  | -4.98735500 | -0.59449700 | -1.90184600 |
| H  | -4.72909800 | 0.55268700  | -0.59577600 |
| C  | -4.05561400 | -1.39161900 | -0.12281700 |
| C  | -4.86688700 | -2.52225900 | -0.11057000 |
| H  | -5.62878200 | -2.65303800 | -0.87238000 |
| C  | -4.68952700 | -3.46381500 | 0.90316700  |
| H  | -5.30507400 | -4.35732900 | 0.94396500  |
| C  | -3.71853700 | -3.22659600 | 1.86959600  |
| H  | -3.56725600 | -3.92414900 | 2.68674400  |
| C  | -2.92749900 | -2.07293200 | 1.79210900  |
| C  | -2.65919200 | -0.76162500 | -2.86926900 |
| H  | -2.98819900 | -0.28756100 | -3.80449100 |
| H  | -3.28247300 | -1.65145500 | -2.74179800 |
| C  | -1.21093400 | -1.26306400 | -3.04416900 |
| C  | -0.74769300 | -2.04561300 | -1.80341900 |
| H  | -1.53837500 | -2.70825300 | -1.43948200 |
| H  | 0.12397000  | -2.66394200 | -2.05100200 |
| Zn | 1.33245400  | 1.38083800  | 0.58651400  |
| N  | 2.53268700  | -0.21330600 | -0.30502800 |
| N  | 2.68425400  | 2.50706700  | -0.77013300 |
| N  | 2.57336000  | 2.42209500  | 2.01763400  |
| O  | -0.13882400 | 1.85945200  | -0.73115500 |
| C  | 2.76880600  | -1.45309100 | 0.19186100  |
| C  | 3.58479200  | -2.35479100 | -0.49650200 |
| H  | 3.76107900  | -3.34196600 | -0.08258700 |
| C  | 4.17622700  | -1.96756300 | -1.69752400 |
| H  | 4.81765400  | -2.65524600 | -2.24058500 |
| C  | 3.95872400  | -0.67589900 | -2.17822500 |
| H  | 4.43304900  | -0.32904300 | -3.09066600 |
| C  | 3.13405500  | 0.17919000  | -1.45288900 |

|   |             |             |             |
|---|-------------|-------------|-------------|
| C | 2.85981900  | 1.59637100  | -1.91320700 |
| H | 3.66104000  | 1.93518400  | -2.58617000 |
| H | 1.92784900  | 1.59928200  | -2.47531700 |
| C | 3.93536200  | 2.65209700  | 0.00023700  |
| H | 4.60124300  | 3.39956800  | -0.45284100 |
| H | 4.46973000  | 1.69585600  | -0.01972900 |
| C | 3.65655700  | 3.00050500  | 1.44764100  |
| C | 4.51816300  | 3.82984000  | 2.15724500  |
| H | 5.36832600  | 4.28287600  | 1.65762200  |
| C | 4.26557500  | 4.06181300  | 3.50850400  |
| H | 4.91712300  | 4.70714900  | 4.08982000  |
| C | 3.16166200  | 3.45406200  | 4.09843500  |
| H | 2.93811000  | 3.61032200  | 5.14825300  |
| C | 2.32487600  | 2.63387200  | 3.33452700  |
| C | 2.18228600  | 3.86077300  | -1.14803700 |
| H | 2.86685100  | 4.29884900  | -1.89289000 |
| H | 2.28488800  | 4.45846100  | -0.23644800 |
| C | 0.72210500  | 4.02048200  | -1.63832700 |
| C | -0.27903300 | 3.27165400  | -0.73249100 |
| H | -0.19644700 | 3.67560900  | 0.29502000  |
| H | -1.27914700 | 3.55515800  | -1.08146700 |
| H | 0.46198900  | -0.80078600 | -0.83892500 |
| O | -0.21599300 | 0.57559900  | 1.53622100  |
| H | -0.11021500 | -0.12499400 | 2.19017100  |
| C | -1.88091300 | -1.80295300 | 2.83913200  |
| H | -2.04679700 | -2.41714000 | 3.72751100  |
| H | -0.88462100 | -2.04624000 | 2.45097200  |
| H | -1.89645400 | -0.75060100 | 3.13625200  |
| C | 1.14370100  | 1.94784600  | 3.96136900  |
| H | 0.24945400  | 2.06498400  | 3.34748000  |
| H | 1.33398500  | 0.87035800  | 4.04844100  |
| H | 0.95331900  | 2.33552600  | 4.96470300  |
| C | 2.10468400  | -1.81744900 | 1.48999700  |
| H | 2.20073300  | -1.00045300 | 2.21313900  |
| H | 1.03794400  | -1.99578400 | 1.31621200  |
| H | 2.54342800  | -2.72019400 | 1.92118300  |
| C | -2.78923700 | 2.42134300  | 2.59738500  |
| H | -3.44753300 | 1.61180700  | 2.93912600  |
| H | -1.77924600 | 2.00905300  | 2.52095100  |
| H | -2.81045700 | 3.21307200  | 3.35039100  |
| C | 0.51218500  | 3.61649900  | -3.11065200 |
| H | -0.45775700 | 3.98883900  | -3.46124900 |
| H | 1.28180600  | 4.05166100  | -3.75813500 |
| H | 0.50680300  | 2.53602900  | -3.25771100 |



|                                                                     |             |             |             |
|---------------------------------------------------------------------|-------------|-------------|-------------|
| C                                                                   | 0.41570200  | 5.53237200  | -1.51925200 |
| H                                                                   | 1.10395600  | 6.12576800  | -2.13158500 |
| H                                                                   | -0.60082600 | 5.74657100  | -1.86670100 |
| H                                                                   | 0.49754000  | 5.88361100  | -0.48349400 |
| C                                                                   | -0.23372600 | -0.12157900 | -3.35293500 |
| H                                                                   | -0.51707300 | 0.38687200  | -4.28150300 |
| H                                                                   | -0.21337000 | 0.61475000  | -2.54482300 |
| H                                                                   | 0.78272100  | -0.51434300 | -3.49435800 |
| C                                                                   | -1.23911800 | -2.26023500 | -4.22342600 |
| H                                                                   | -0.23012700 | -2.62519200 | -4.44328200 |
| H                                                                   | -1.87206600 | -3.13010000 | -4.00957900 |
| H                                                                   | -1.62207700 | -1.78229000 | -5.13142000 |
| $[\text{Zn}_2(\text{L}^2)(\text{L}^2\text{H})(\mu\text{-OH})]^{2+}$ |             |             |             |
| Zn                                                                  | -1.68337300 | 0.44052000  | 0.05731600  |
| N                                                                   | -3.04537000 | 2.12452000  | 0.12292300  |
| N                                                                   | -2.98819600 | 0.12476400  | -1.76106700 |
| N                                                                   | -3.11961800 | -1.14417500 | 0.79148300  |
| O                                                                   | -0.37414200 | -1.16923200 | -0.73679800 |
| C                                                                   | -3.33588900 | 2.91457800  | 1.17908700  |
| C                                                                   | -4.00206100 | 4.13145800  | 0.99692300  |
| H                                                                   | -4.21723600 | 4.75964100  | 1.85492700  |
| C                                                                   | -4.40023600 | 4.50967800  | -0.28372400 |
| H                                                                   | -4.92655300 | 5.44636500  | -0.44070600 |
| C                                                                   | -4.13499400 | 3.66004400  | -1.35894900 |
| H                                                                   | -4.45675100 | 3.91031000  | -2.36498700 |
| C                                                                   | -3.44541800 | 2.47553100  | -1.11803700 |
| C                                                                   | -3.09786800 | 1.52002800  | -2.24523300 |
| H                                                                   | -3.85334600 | 1.60688700  | -3.04033800 |
| H                                                                   | -2.12955100 | 1.80059800  | -2.66874100 |
| C                                                                   | -4.28344200 | -0.31552000 | -1.17412000 |
| H                                                                   | -4.96972000 | -0.66029800 | -1.95736000 |
| H                                                                   | -4.76268300 | 0.53824200  | -0.69009500 |
| C                                                                   | -4.08522100 | -1.38056200 | -0.12290000 |
| C                                                                   | -4.91017000 | -2.49960000 | -0.07423900 |
| H                                                                   | -5.66574200 | -2.65151900 | -0.83809400 |
| C                                                                   | -4.74672700 | -3.40782000 | 0.96995000  |
| H                                                                   | -5.37069900 | -4.29386600 | 1.03697800  |
| C                                                                   | -3.77643000 | -3.14900100 | 1.93314000  |
| H                                                                   | -3.63687200 | -3.82010800 | 2.77428200  |
| C                                                                   | -2.97545100 | -2.00674400 | 1.82144700  |
| C                                                                   | -2.64300700 | -0.82835700 | -2.87358300 |
| H                                                                   | -3.02820300 | -0.40919700 | -3.81333500 |
| H                                                                   | -3.20476900 | -1.74309600 | -2.68248100 |
| C                                                                   | -1.17830100 | -1.25578500 | -3.10021000 |

|    |             |             |             |
|----|-------------|-------------|-------------|
| C  | -0.62146500 | -2.02047200 | -1.88340800 |
| H  | 0.34634300  | -2.47229900 | -2.15079700 |
| Zn | 1.29897300  | 1.49854600  | 0.61994300  |
| N  | 2.47340700  | -0.18886000 | -0.28794100 |
| N  | 2.65922500  | 2.51756900  | -0.78338000 |
| N  | 2.67913500  | 2.34821200  | 2.02550800  |
| O  | -0.19588600 | 1.85104200  | -0.85920400 |
| C  | 2.72302600  | -1.41287700 | 0.23747100  |
| C  | 3.54571800  | -2.32511400 | -0.42876200 |
| H  | 3.73450300  | -3.29936900 | 0.00982400  |
| C  | 4.12968000  | -1.96245200 | -1.64178800 |
| H  | 4.77524400  | -2.65780200 | -2.17005200 |
| C  | 3.90070400  | -0.68429500 | -2.15248400 |
| H  | 4.37099400  | -0.35495500 | -3.07351800 |
| C  | 3.07163400  | 0.18128200  | -1.44341200 |
| C  | 2.79390600  | 1.59124000  | -1.92087900 |
| H  | 3.57790100  | 1.91560800  | -2.62021300 |
| H  | 1.84412100  | 1.59472700  | -2.45208300 |
| C  | 3.93666900  | 2.64973600  | -0.04609800 |
| H  | 4.58578500  | 3.40417000  | -0.51028700 |
| H  | 4.46906200  | 1.69413600  | -0.10209600 |
| C  | 3.71339900  | 2.97059200  | 1.41791800  |
| C  | 4.57505400  | 3.81926000  | 2.10535100  |
| H  | 5.38835800  | 4.30978700  | 1.58038800  |
| C  | 4.36900000  | 4.02251700  | 3.46934100  |
| H  | 5.02218000  | 4.68094900  | 4.03386400  |
| C  | 3.30901800  | 3.37208300  | 4.09476300  |
| H  | 3.12173400  | 3.50914700  | 5.15433900  |
| C  | 2.47027700  | 2.53817000  | 3.34939400  |
| C  | 2.16796700  | 3.87316800  | -1.16795700 |
| H  | 2.81747300  | 4.28104700  | -1.95845600 |
| H  | 2.32104100  | 4.48615100  | -0.27675100 |
| C  | 0.68551000  | 4.04244100  | -1.59217300 |
| C  | -0.26999600 | 3.21927000  | -0.69688700 |
| H  | -1.28655900 | 3.59343400  | -0.86987100 |
| H  | 0.49319000  | -0.73468800 | -0.82803800 |
| O  | -0.28448200 | 0.66112100  | 1.49930300  |
| H  | -0.17630200 | -0.01299000 | 2.18070400  |
| C  | -1.93219300 | -1.70912300 | 2.86538900  |
| H  | -2.09173800 | -2.31130000 | 3.76307000  |
| H  | -0.93071700 | -1.94396100 | 2.48499800  |
| H  | -1.96059200 | -0.65299500 | 3.14861400  |
| C  | 1.31657200  | 1.81852800  | 3.99278400  |
| H  | 0.38695300  | 2.00909700  | 3.44982300  |

|                                                             |             |             |             |
|-------------------------------------------------------------|-------------|-------------|-------------|
| H                                                           | 1.48490300  | 0.73427200  | 3.97678000  |
| H                                                           | 1.19356100  | 2.12275600  | 5.03462400  |
| C                                                           | 2.06404000  | -1.74389400 | 1.54727500  |
| H                                                           | 2.19217000  | -0.91951800 | 2.25678700  |
| H                                                           | 0.98996400  | -1.89021300 | 1.38995500  |
| H                                                           | 2.48094800  | -2.65294600 | 1.98697200  |
| C                                                           | -2.95764200 | 2.40962800  | 2.54664800  |
| H                                                           | -3.70124600 | 1.67697500  | 2.88643300  |
| H                                                           | -1.98992400 | 1.89798000  | 2.52483100  |
| H                                                           | -2.93035700 | 3.22049800  | 3.27941100  |
| C                                                           | 0.41050100  | 3.69339600  | -3.06712800 |
| H                                                           | -0.61969600 | 3.96535500  | -3.32755300 |
| H                                                           | 1.07296600  | 4.26291700  | -3.72785500 |
| H                                                           | 0.52581900  | 2.63310900  | -3.29175200 |
| C                                                           | 0.36620500  | 5.54450000  | -1.40478000 |
| H                                                           | 1.03601500  | 6.16280500  | -2.01299900 |
| H                                                           | -0.65932000 | 5.76052100  | -1.72494400 |
| H                                                           | 0.46683100  | 5.84781200  | -0.35914900 |
| C                                                           | -0.25266100 | -0.07697600 | -3.42531900 |
| H                                                           | -0.58288400 | 0.41888000  | -4.34472800 |
| H                                                           | -0.23488700 | 0.65743500  | -2.61800800 |
| H                                                           | 0.77209800  | -0.43219400 | -3.60112400 |
| C                                                           | -1.19338800 | -2.23885200 | -4.29370900 |
| H                                                           | -0.18008300 | -2.59701600 | -4.50767700 |
| H                                                           | -1.82587000 | -3.10883300 | -4.09504400 |
| H                                                           | -1.56162100 | -1.74020000 | -5.19640400 |
| O                                                           | -1.54310900 | -2.98331600 | -1.48446000 |
| H                                                           | -1.14847200 | -3.56552100 | -0.81708900 |
| O                                                           | 0.08662000  | 3.54832600  | 0.68528500  |
| H                                                           | -0.64892300 | 3.25991300  | 1.24892500  |
| $[\text{Zn}_2(\text{L}^1\text{H})_2(\mu\text{-OH})_2]^{2+}$ |             |             |             |
| Zn                                                          | -0.26598500 | 1.96747100  | -1.90093700 |
| N                                                           | -1.98658600 | 1.57817000  | -3.14612800 |
| N                                                           | 0.31026600  | 2.86976300  | -3.89858800 |
| N                                                           | 1.17142000  | 0.35802900  | -2.84039500 |
| O                                                           | 1.74622600  | 2.77899800  | -1.09269600 |
| C                                                           | -2.94227900 | 0.64534200  | -2.96640700 |
| C                                                           | -4.15992900 | 0.73729500  | -3.64857200 |
| H                                                           | -4.91881600 | -0.02466000 | -3.50344000 |
| C                                                           | -4.37287600 | 1.80079700  | -4.52434800 |
| H                                                           | -5.31094900 | 1.88698400  | -5.06451100 |
| C                                                           | -3.35362100 | 2.73290400  | -4.73233000 |
| H                                                           | -3.47229200 | 3.54356200  | -5.44456600 |
| C                                                           | -2.16240700 | 2.58379400  | -4.02677200 |

|    |             |             |             |
|----|-------------|-------------|-------------|
| C  | -0.97859000 | 3.51682500  | -4.24649000 |
| H  | -0.98115600 | 3.85489300  | -5.29355700 |
| H  | -1.07328400 | 4.40392100  | -3.61358500 |
| C  | 0.54237000  | 1.68386500  | -4.76936700 |
| H  | 0.91993900  | 1.98908300  | -5.75335700 |
| H  | -0.40930300 | 1.17584400  | -4.93671100 |
| C  | 1.47683000  | 0.69643500  | -4.11188500 |
| C  | 2.54511800  | 0.13498100  | -4.80545700 |
| H  | 2.75621200  | 0.44223000  | -5.82483500 |
| C  | 3.32462700  | -0.82891600 | -4.16467800 |
| H  | 4.16899300  | -1.28495900 | -4.67274600 |
| C  | 2.99431400  | -1.20094600 | -2.86581300 |
| H  | 3.56829000  | -1.95977900 | -2.34430000 |
| C  | 1.90452800  | -0.59635300 | -2.22355900 |
| C  | 1.46491600  | 3.82146000  | -4.08138800 |
| H  | 1.13827100  | 4.62935000  | -4.74891900 |
| H  | 2.23852500  | 3.27168700  | -4.62478900 |
| C  | 2.15362300  | 4.45638500  | -2.85195900 |
| C  | 2.76609300  | 3.39102700  | -1.93098300 |
| H  | 3.25415100  | 2.60466800  | -2.51911300 |
| H  | 3.50935700  | 3.85172200  | -1.27098700 |
| O  | -0.41312300 | 1.33099700  | -0.02911600 |
| H  | -0.92617700 | 0.51503100  | 0.04401300  |
| H  | 2.10729100  | 1.98727700  | -0.65997100 |
| Zn | -1.39516100 | 3.10849300  | 0.82892700  |
| N  | -3.13130800 | 1.77543500  | 1.07852500  |
| N  | -1.28462700 | 2.39839800  | 2.99935900  |
| N  | -2.14787100 | 4.88096900  | 1.97542500  |
| O  | 0.54748900  | 4.00942700  | 1.05507300  |
| C  | -4.25810900 | 1.74554200  | 0.33909400  |
| C  | -5.14584600 | 0.66817500  | 0.43551900  |
| H  | -6.05492200 | 0.66371300  | -0.15715300 |
| C  | -4.85695600 | -0.37906400 | 1.30832100  |
| H  | -5.53485900 | -1.22270900 | 1.39776800  |
| C  | -3.70736100 | -0.31299600 | 2.09772100  |
| H  | -3.48025300 | -1.08790900 | 2.82335100  |
| C  | -2.86940100 | 0.79206000  | 1.96398900  |
| C  | -1.64422900 | 0.97214400  | 2.85076100  |
| H  | -1.84127100 | 0.50636300  | 3.82875600  |
| H  | -0.78345500 | 0.46056700  | 2.41212300  |
| C  | -2.39130400 | 3.14503000  | 3.65577200  |
| H  | -2.35842800 | 3.01829300  | 4.74570700  |
| H  | -3.34596700 | 2.73540800  | 3.31858500  |
| C  | -2.35470000 | 4.60881700  | 3.28190900  |

|   |             |             |             |
|---|-------------|-------------|-------------|
| C | -2.56046800 | 5.60485900  | 4.23127000  |
| H | -2.71520200 | 5.34188400  | 5.27281200  |
| C | -2.56322500 | 6.93595300  | 3.81306200  |
| H | -2.71966300 | 7.73910000  | 4.52689600  |
| C | -2.35490300 | 7.21623600  | 2.46663200  |
| H | -2.34737700 | 8.24010400  | 2.10812200  |
| C | -2.14515300 | 6.16795600  | 1.56167300  |
| C | -0.03829400 | 2.58174700  | 3.81981500  |
| H | 0.04973700  | 1.72712100  | 4.50594400  |
| H | -0.21068200 | 3.46114200  | 4.44708100  |
| C | 1.32237200  | 2.80719100  | 3.12097100  |
| C | 1.30787500  | 4.09330000  | 2.27215600  |
| H | 0.86797300  | 4.91857400  | 2.84181900  |
| H | 2.33632000  | 4.37679300  | 2.01743000  |
| O | -1.27063200 | 3.61246800  | -1.10550000 |
| H | -2.06381100 | 3.96454100  | -1.52750900 |
| H | 1.08754300  | 3.65321400  | 0.31685000  |
| C | -4.51409300 | 2.91052300  | -0.57936800 |
| H | -4.16749800 | 3.84010500  | -0.11763800 |
| H | -3.97537100 | 2.77751700  | -1.52391900 |
| H | -5.57812600 | 3.00551600  | -0.81115500 |
| C | -2.62956800 | -0.48007900 | -2.01701100 |
| H | -1.57374900 | -0.75640900 | -2.09840000 |
| H | -2.82464300 | -0.17660500 | -0.98257800 |
| H | -3.24403100 | -1.35960500 | -2.22575700 |
| C | -1.91408200 | 6.43784100  | 0.10145100  |
| H | -2.76679700 | 6.08195700  | -0.49066400 |
| H | -1.79741900 | 7.50763300  | -0.08789100 |
| H | -1.02923600 | 5.90306200  | -0.24833600 |
| C | 1.49895100  | -1.02397100 | -0.83812400 |
| H | 0.55028300  | -1.57468700 | -0.88049700 |
| H | 2.24793100  | -1.68340000 | -0.39305900 |
| H | 1.32875200  | -0.16565200 | -0.18444100 |
| C | 1.76271100  | 1.60240100  | 2.27853600  |
| H | 2.75955900  | 1.78409300  | 1.85237900  |
| H | 1.84098000  | 0.70255500  | 2.90030500  |
| H | 1.05744200  | 1.41010200  | 1.46669100  |
| C | 2.34344100  | 3.04056300  | 4.25852100  |
| H | 3.35097900  | 3.17400400  | 3.85031900  |
| H | 2.10128900  | 3.93107900  | 4.85136300  |
| H | 2.37503200  | 2.18298800  | 4.93915700  |
| C | 1.21731100  | 5.39501100  | -2.07705200 |
| H | 0.88380200  | 6.21014100  | -2.73060500 |
| H | 0.34004500  | 4.87033900  | -1.69394800 |

|                                                             |             |             |             |
|-------------------------------------------------------------|-------------|-------------|-------------|
| H                                                           | 1.74211800  | 5.85046000  | -1.22867300 |
| C                                                           | 3.34456400  | 5.26759300  | -3.41664900 |
| H                                                           | 3.85215900  | 5.81290900  | -2.61443900 |
| H                                                           | 4.08426700  | 4.62581200  | -3.91107400 |
| H                                                           | 2.99931700  | 6.00560400  | -4.14818100 |
| $[\text{Zn}_2(\text{L}^2\text{H})_2(\mu\text{-OH})_2]^{2+}$ |             |             |             |
| Zn                                                          | 2.89590000  | -1.81696500 | -1.01297400 |
| N                                                           | 0.93923300  | -1.17209200 | -0.23319900 |
| N                                                           | 2.55476800  | -3.21671900 | 0.69570000  |
| N                                                           | 4.03865900  | -0.76980900 | 0.52996200  |
| O                                                           | 6.16980600  | -5.16907200 | -1.45759100 |
| O                                                           | 5.29904300  | -3.22966300 | -0.62588400 |
| C                                                           | 0.27759300  | -0.02242900 | -0.46837700 |
| C                                                           | -1.09647700 | 0.07198200  | -0.24233400 |
| H                                                           | -1.61818100 | 0.99976600  | -0.44956500 |
| C                                                           | -1.78211300 | -1.03982700 | 0.24627100  |
| H                                                           | -2.85130600 | -0.98703400 | 0.42664600  |
| C                                                           | -1.07986500 | -2.21489100 | 0.51239000  |
| H                                                           | -1.58153800 | -3.08986700 | 0.91402900  |
| C                                                           | 0.28863000  | -2.24582000 | 0.25242800  |
| C                                                           | 1.10817800  | -3.50215200 | 0.49007400  |
| H                                                           | 0.69244100  | -4.04779200 | 1.34978700  |
| H                                                           | 1.02972100  | -4.14052500 | -0.39351600 |
| C                                                           | 2.74304000  | -2.32234400 | 1.87729100  |
| H                                                           | 2.81982100  | -2.90635500 | 2.80164100  |
| H                                                           | 1.86037300  | -1.68810500 | 1.98189800  |
| C                                                           | 3.93437500  | -1.40525400 | 1.71748900  |
| C                                                           | 4.81690400  | -1.16969600 | 2.76591100  |
| H                                                           | 4.70516800  | -1.70349000 | 3.70433400  |
| C                                                           | 5.83408900  | -0.23015500 | 2.58513800  |
| H                                                           | 6.54331600  | -0.02525500 | 3.38158800  |
| C                                                           | 5.91712200  | 0.44825900  | 1.37350500  |
| H                                                           | 6.68209900  | 1.19995900  | 1.20889000  |
| C                                                           | 4.99849700  | 0.16552600  | 0.35342600  |
| C                                                           | 3.30958000  | -4.49585700 | 0.95800300  |
| H                                                           | 2.60490700  | -5.19269400 | 1.43075800  |
| H                                                           | 4.06114700  | -4.26429400 | 1.71826000  |
| C                                                           | 4.04649500  | -5.24441700 | -0.18330400 |
| C                                                           | 5.44679700  | -4.60992600 | -0.37037200 |
| H                                                           | 6.02279300  | -4.74809900 | 0.55777200  |
| C                                                           | 4.28560600  | -6.68357800 | 0.32849900  |
| H                                                           | 3.33440900  | -7.21005700 | 0.45573200  |
| H                                                           | 4.80718100  | -6.69701100 | 1.29375800  |
| H                                                           | 4.88139200  | -7.25449500 | -0.39081700 |

|    |             |             |             |
|----|-------------|-------------|-------------|
| C  | 3.26314900  | -5.31199100 | -1.49777200 |
| H  | 3.02579700  | -4.33396800 | -1.90984500 |
| H  | 2.31703400  | -5.84356700 | -1.34451000 |
| H  | 3.83988200  | -5.86508800 | -2.24225600 |
| H  | 6.16496000  | -2.79829300 | -0.53894200 |
| C  | 1.10555900  | 1.12728900  | -0.97728200 |
| H  | 0.49085100  | 1.99770100  | -1.22299800 |
| H  | 1.84228900  | 1.42769300  | -0.22252400 |
| H  | 1.67439200  | 0.82786200  | -1.86732600 |
| C  | 5.01928500  | 0.91454800  | -0.95005200 |
| H  | 4.21253800  | 1.65917000  | -0.96262300 |
| H  | 5.96360700  | 1.44812900  | -1.08646400 |
| H  | 4.85214200  | 0.23034700  | -1.78603800 |
| Zn | 2.74438200  | -2.32927500 | -4.05237100 |
| N  | 3.56777400  | -4.21099000 | -4.66313200 |
| N  | 1.06876000  | -3.27343500 | -5.54760600 |
| N  | 2.75280600  | -1.03102900 | -5.72197100 |
| O  | -2.14193900 | -0.59470200 | -3.36255900 |
| O  | 0.06881800  | -0.81336100 | -3.78758100 |
| C  | 4.87025700  | -4.57048200 | -4.61684600 |
| C  | 5.24954400  | -5.90726200 | -4.78352100 |
| H  | 6.30127300  | -6.16922300 | -4.73801100 |
| C  | 4.27995200  | -6.87419100 | -5.02067300 |
| H  | 4.55897800  | -7.91506800 | -5.15471000 |
| C  | 2.94521700  | -6.48084800 | -5.12604200 |
| H  | 2.16660200  | -7.19907200 | -5.36245400 |
| C  | 2.62348600  | -5.13976000 | -4.94759900 |
| C  | 1.18783500  | -4.67541700 | -5.10152700 |
| H  | 0.67272800  | -5.36307400 | -5.79193800 |
| H  | 0.69238100  | -4.75062000 | -4.13209000 |
| C  | 1.82371900  | -3.01555000 | -6.79817800 |
| H  | 1.24084200  | -3.28063700 | -7.69114100 |
| H  | 2.72156400  | -3.63614000 | -6.81787600 |
| C  | 2.25507200  | -1.56636300 | -6.86115800 |
| C  | 2.16582400  | -0.83586800 | -8.04196300 |
| H  | 1.75738600  | -1.29969200 | -8.93396000 |
| C  | 2.60443200  | 0.48750100  | -8.05155400 |
| H  | 2.54863600  | 1.08166300  | -8.95868300 |
| C  | 3.10067900  | 1.03883600  | -6.87464500 |
| H  | 3.43751500  | 2.06887900  | -6.84194200 |
| C  | 3.16321800  | 0.25892500  | -5.71383100 |
| C  | -0.35593300 | -2.90758400 | -5.82845200 |
| H  | -0.78912600 | -3.73800100 | -6.40899900 |
| H  | -0.31686800 | -2.05251000 | -6.51165600 |

|                                                                     |             |             |             |
|---------------------------------------------------------------------|-------------|-------------|-------------|
| C                                                                   | -1.38291700 | -2.52740800 | -4.72241400 |
| C                                                                   | -1.21152500 | -1.03583100 | -4.34119400 |
| H                                                                   | -1.32496100 | -0.42273700 | -5.25060100 |
| C                                                                   | -2.76784800 | -2.62976400 | -5.41099000 |
| H                                                                   | -2.96596500 | -3.65977600 | -5.72312900 |
| H                                                                   | -2.83487300 | -1.99254000 | -6.30182500 |
| H                                                                   | -3.56758100 | -2.34422800 | -4.72048600 |
| C                                                                   | -1.39717000 | -3.43963200 | -3.48669900 |
| H                                                                   | -0.43765300 | -3.47039500 | -2.97109400 |
| H                                                                   | -1.66395700 | -4.46135400 | -3.77947900 |
| H                                                                   | -2.15281400 | -3.08604300 | -2.77921700 |
| H                                                                   | 0.07134200  | 0.09385100  | -3.43964200 |
| C                                                                   | 5.91426300  | -3.51138500 | -4.39709600 |
| H                                                                   | 6.26817200  | -3.55327800 | -3.36051900 |
| H                                                                   | 6.78075000  | -3.69341200 | -5.04062100 |
| H                                                                   | 5.52569200  | -2.51338700 | -4.61108900 |
| C                                                                   | 3.68726200  | 0.82702200  | -4.42678800 |
| H                                                                   | 4.63263100  | 0.35206600  | -4.15123400 |
| H                                                                   | 3.83495900  | 1.90673000  | -4.50340900 |
| H                                                                   | 2.99849100  | 0.61562100  | -3.60371800 |
| H                                                                   | -2.94929200 | -0.27239900 | -3.79234800 |
| H                                                                   | 6.79650600  | -5.83561900 | -1.13803400 |
| O                                                                   | 4.05877600  | -1.59822700 | -2.63913400 |
| H                                                                   | 4.82655900  | -2.16562300 | -2.47294500 |
| O                                                                   | 1.65208100  | -2.66338600 | -2.45271300 |
| H                                                                   | 0.85276000  | -2.12450100 | -2.57381300 |
| [Zn <sub>2</sub> (L <sup>1</sup> H)(L <sup>n</sup> )] <sup>3+</sup> |             |             |             |
| Zn                                                                  | -2.45693700 | -0.49194000 | 0.20045900  |
| N                                                                   | -2.08064300 | 1.27405100  | 1.39619400  |
| N                                                                   | -2.87795000 | 1.09729900  | -1.19614500 |
| N                                                                   | -4.50622200 | -0.76518000 | 0.11947500  |
| O                                                                   | -1.62243500 | -1.81990100 | -1.06133200 |
| C                                                                   | -2.11227400 | 1.40979500  | 2.74657600  |
| C                                                                   | -1.72230000 | 2.60535700  | 3.35656800  |
| H                                                                   | -1.75674900 | 2.68894000  | 4.43825700  |
| C                                                                   | -1.33131300 | 3.68672800  | 2.57077600  |
| H                                                                   | -1.02981500 | 4.62275600  | 3.03110700  |
| C                                                                   | -1.38873100 | 3.56613600  | 1.18137700  |
| H                                                                   | -1.15946600 | 4.40882100  | 0.53650500  |
| C                                                                   | -1.77484600 | 2.35027000  | 0.62908000  |
| C                                                                   | -1.93200400 | 2.19129400  | -0.87130600 |
| H                                                                   | -2.27126800 | 3.14158200  | -1.30688300 |
| H                                                                   | -0.96867200 | 1.96119400  | -1.32779900 |
| C                                                                   | -4.26488100 | 1.48595700  | -0.80155200 |



|    |             |             |             |
|----|-------------|-------------|-------------|
| H  | -4.72961500 | 2.10159100  | -1.58084100 |
| H  | -4.20805900 | 2.10312000  | 0.10037100  |
| C  | -5.12347800 | 0.27706100  | -0.48841100 |
| C  | -6.48757300 | 0.26004700  | -0.75639000 |
| H  | -6.95675700 | 1.10442600  | -1.25101800 |
| C  | -7.23401900 | -0.85683600 | -0.37551900 |
| H  | -8.30180200 | -0.89521900 | -0.56883600 |
| C  | -6.59060000 | -1.92675300 | 0.24531200  |
| H  | -7.14511400 | -2.80972500 | 0.54473700  |
| C  | -5.21613400 | -1.86091400 | 0.47897700  |
| C  | -2.85442100 | 0.73697400  | -2.64880000 |
| H  | -2.71047500 | 1.65493600  | -3.23534200 |
| H  | -3.85478400 | 0.36418800  | -2.88883300 |
| C  | -1.84389800 | -0.34027400 | -3.09824400 |
| C  | -2.13280900 | -1.69581400 | -2.40757200 |
| H  | -3.21706700 | -1.87209600 | -2.38532100 |
| H  | -1.69644600 | -2.48874900 | -3.02138500 |
| Zn | -0.25451200 | -3.17091900 | -0.77366700 |
| N  | 1.54955200  | -2.76476000 | -1.76741100 |
| N  | 1.19127600  | -3.73684100 | 0.75826900  |
| N  | -0.58579200 | -5.20390900 | -0.83766000 |
| O  | -0.98107400 | -1.50188800 | 1.55690900  |
| C  | 1.81150700  | -2.76143800 | -3.09538100 |
| C  | 3.03953100  | -2.28923600 | -3.57236100 |
| H  | 3.23180000  | -2.28804400 | -4.64059900 |
| C  | 4.01118400  | -1.86048600 | -2.67321800 |
| H  | 4.96887500  | -1.49490700 | -3.03125700 |
| C  | 3.76297900  | -1.96527800 | -1.30061200 |
| H  | 4.52879400  | -1.71477000 | -0.57329800 |
| C  | 2.52427000  | -2.43077500 | -0.88354800 |
| C  | 2.21570500  | -2.67030200 | 0.58547300  |
| H  | 3.14261000  | -2.92035600 | 1.11888500  |
| H  | 1.81127400  | -1.76088200 | 1.03465400  |
| C  | 1.64138800  | -5.03769900 | 0.14962900  |
| H  | 2.26971400  | -5.59357100 | 0.85393000  |
| H  | 2.25580100  | -4.83043000 | -0.72805800 |
| C  | 0.45607300  | -5.87589400 | -0.28479900 |
| C  | 0.45758000  | -7.25999700 | -0.17645200 |
| H  | 1.30100200  | -7.77155500 | 0.27597200  |
| C  | -0.64261800 | -7.97255500 | -0.66125900 |
| H  | -0.66944600 | -9.05574100 | -0.59041100 |
| C  | -1.70765300 | -7.27656600 | -1.22795600 |
| H  | -2.57522600 | -7.80488600 | -1.60886200 |
| C  | -1.66191300 | -5.88194400 | -1.30782600 |

|                                                                     |             |             |             |
|---------------------------------------------------------------------|-------------|-------------|-------------|
| C                                                                   | 0.90795600  | -4.06261000 | 2.19991200  |
| H                                                                   | 1.86740300  | -4.29446500 | 2.68407300  |
| H                                                                   | 0.34177300  | -4.99767700 | 2.15830900  |
| C                                                                   | 0.11355000  | -3.11135400 | 3.12270200  |
| C                                                                   | -1.17849800 | -2.63356700 | 2.45116300  |
| H                                                                   | -1.60815200 | -3.41737900 | 1.82287900  |
| H                                                                   | -1.91953500 | -2.35757700 | 3.20570800  |
| H                                                                   | -0.55459100 | -0.78889700 | 2.06142300  |
| C                                                                   | 0.79025500  | -3.33876400 | -4.03763800 |
| H                                                                   | -0.02878900 | -3.81779300 | -3.49427300 |
| H                                                                   | 0.37605000  | -2.57808800 | -4.70682600 |
| H                                                                   | 1.25720500  | -4.09923300 | -4.67301800 |
| C                                                                   | -2.77116300 | -5.08835000 | -1.93957800 |
| H                                                                   | -2.93072500 | -4.14472700 | -1.41034800 |
| H                                                                   | -2.52505900 | -4.85046600 | -2.98246100 |
| H                                                                   | -3.70705100 | -5.65214000 | -1.94721000 |
| C                                                                   | -4.45841400 | -2.97672800 | 1.14291000  |
| H                                                                   | -3.52119700 | -3.16535400 | 0.60763800  |
| H                                                                   | -4.21192300 | -2.71304900 | 2.17899600  |
| H                                                                   | -5.04057500 | -3.90083100 | 1.16695300  |
| C                                                                   | -2.63695700 | 0.26729400  | 3.57638800  |
| H                                                                   | -3.14447800 | -0.47169800 | 2.95169900  |
| H                                                                   | -1.83909300 | -0.22767300 | 4.14302300  |
| H                                                                   | -3.35691700 | 0.63736300  | 4.31323300  |
| C                                                                   | -0.31596900 | -3.98682300 | 4.32869400  |
| H                                                                   | 0.55198200  | -4.46966300 | 4.78899500  |
| H                                                                   | -0.79836000 | -3.37613500 | 5.09829000  |
| H                                                                   | -1.01855200 | -4.77380600 | 4.02977100  |
| C                                                                   | 0.94371800  | -1.93130200 | 3.66860900  |
| H                                                                   | 0.36122700  | -1.35181100 | 4.39480900  |
| H                                                                   | 1.82652300  | -2.30358900 | 4.19755200  |
| H                                                                   | 1.30654500  | -1.24179200 | 2.89860700  |
| C                                                                   | -2.10737300 | -0.53522100 | -4.60954800 |
| H                                                                   | -1.97676300 | 0.40386600  | -5.15693900 |
| H                                                                   | -1.41204400 | -1.26268000 | -5.03952900 |
| H                                                                   | -3.12526200 | -0.89479000 | -4.80177500 |
| C                                                                   | -0.38151600 | 0.07749900  | -2.88001100 |
| H                                                                   | 0.29545500  | -0.63368500 | -3.35847200 |
| H                                                                   | -0.18236500 | 1.05937900  | -3.32270800 |
| H                                                                   | -0.11516900 | 0.10189100  | -1.81812200 |
| [Zn <sub>2</sub> (L <sup>2</sup> H)(L <sup>n</sup> )] <sup>3+</sup> |             |             |             |
| Zn                                                                  | 0.14026800  | -0.45031100 | 0.52441800  |
| N                                                                   | -1.80237400 | -1.08130900 | 0.22560200  |
| N                                                                   | -0.44231700 | 1.01139700  | -0.88648700 |

|   |             |             |             |
|---|-------------|-------------|-------------|
| N | 1.22511800  | -1.26119300 | -1.00945900 |
| O | 0.91917200  | 0.72062800  | 1.90864600  |
| O | 2.64445100  | 1.01542100  | 0.49125500  |
| C | -2.31835400 | -2.31486500 | 0.44186000  |
| C | -3.67591500 | -2.56123000 | 0.22180400  |
| H | -4.07835100 | -3.55217600 | 0.40521700  |
| C | -4.48986700 | -1.54136600 | -0.27026900 |
| H | -5.54465900 | -1.72169200 | -0.45504800 |
| C | -3.92440000 | -0.29856700 | -0.56488300 |
| H | -4.51999700 | 0.49863000  | -0.99838900 |
| C | -2.57290700 | -0.10049000 | -0.30688400 |
| C | -1.88577200 | 1.22010700  | -0.61822800 |
| H | -2.38242400 | 1.70835300  | -1.46758000 |
| H | -1.98006400 | 1.89130800  | 0.23677800  |
| C | -0.24925400 | 0.29956400  | -2.18588500 |
| H | -0.19016000 | 1.01546300  | -3.01382100 |
| H | -1.13238800 | -0.32205600 | -2.36782500 |
| C | 0.96453300  | -0.61159200 | -2.17140500 |
| C | 1.72313400  | -0.83343200 | -3.31262100 |
| H | 1.50175500  | -0.29633100 | -4.22933500 |
| C | 2.76687000  | -1.76204300 | -3.25641300 |
| H | 3.37647700  | -1.95527700 | -4.13390300 |
| C | 3.01680900  | -2.43375500 | -2.06300900 |
| H | 3.81795400  | -3.16206300 | -1.99220000 |
| C | 2.22849900  | -2.16210300 | -0.94113000 |
| C | 0.37412400  | 2.26422400  | -0.86535200 |
| H | -0.18147800 | 3.06266200  | -1.37629300 |
| H | 1.25337800  | 2.04489100  | -1.47440300 |
| C | 0.88352100  | 2.78614500  | 0.49808500  |
| C | 1.70539800  | 1.72733900  | 1.28980600  |
| H | 2.23422700  | 2.27276900  | 2.07276900  |
| C | 1.83865600  | 3.95806800  | 0.16076000  |
| H | 1.29912800  | 4.76569000  | -0.34406500 |
| H | 2.65799300  | 3.65729400  | -0.50335500 |
| H | 2.27447400  | 4.37902300  | 1.07389300  |
| C | -0.22141600 | 3.33343600  | 1.42096000  |
| H | -0.87615600 | 2.54571100  | 1.79822700  |
| H | -0.82968000 | 4.08024100  | 0.90014000  |
| H | 0.22434500  | 3.82643900  | 2.29280100  |
| H | 3.33326300  | 1.61161200  | 0.15416600  |
| C | -1.36617100 | -3.41376000 | 0.82784500  |
| H | -0.54273300 | -3.03213800 | 1.43772300  |
| H | -1.87118300 | -4.21773800 | 1.36996300  |
| H | -0.93105800 | -3.85528100 | -0.07785400 |

|    |             |             |            |
|----|-------------|-------------|------------|
| C  | 2.43736000  | -2.88239500 | 0.36157800 |
| H  | 2.04633700  | -2.29419600 | 1.19791000 |
| H  | 1.92264100  | -3.85133600 | 0.35199200 |
| H  | 3.49820600  | -3.07430200 | 0.54450000 |
| Zn | 1.03070400  | 0.54730500  | 3.88325100 |
| N  | 1.66709300  | 2.48247300  | 4.51482500 |
| N  | -0.35278900 | 0.90201500  | 5.47596100 |
| N  | 1.98781100  | -0.68634600 | 5.22214600 |
| O  | -0.24006700 | -1.39118400 | 3.30662600 |
| O  | -1.14913800 | -2.61157700 | 4.98767500 |
| C  | 2.87414900  | 3.07662900  | 4.36470400 |
| C  | 3.05494200  | 4.41525600  | 4.72873500 |
| H  | 4.02677500  | 4.87991300  | 4.59564200 |
| C  | 1.99494000  | 5.12731300  | 5.28497500 |
| H  | 2.12315000  | 6.16547600  | 5.57627800 |
| C  | 0.77638700  | 4.47799700  | 5.50339600 |
| H  | -0.05157100 | 4.98881700  | 5.98490400 |
| C  | 0.65073700  | 3.15220300  | 5.10820300 |
| C  | -0.62312300 | 2.36495800  | 5.36029200 |
| H  | -1.11204700 | 2.74168900  | 6.26872700 |
| H  | -1.32341100 | 2.50693400  | 4.53251700 |
| C  | 0.51878300  | 0.62654500  | 6.66657400 |
| H  | -0.09060300 | 0.49645000  | 7.56663800 |
| H  | 1.15344100  | 1.49984500  | 6.84058100 |
| C  | 1.43431600  | -0.56328200 | 6.45501500 |
| C  | 1.77275800  | -1.42183700 | 7.49133800 |
| H  | 1.31138000  | -1.31010000 | 8.46714700 |
| C  | 2.72285000  | -2.42029500 | 7.25418100 |
| H  | 3.00566200  | -3.10660600 | 8.04660800 |
| C  | 3.30769100  | -2.51946800 | 5.99480000 |
| H  | 4.06039400  | -3.27359800 | 5.78877100 |
| C  | 2.92263600  | -1.63363900 | 4.98315400 |
| C  | -1.63356000 | 0.12470900  | 5.62876600 |
| H  | -2.36812300 | 0.78218600  | 6.10922400 |
| H  | -1.43118400 | -0.68800000 | 6.32732700 |
| C  | -2.28028000 | -0.51058500 | 4.38153100 |
| C  | -1.49774800 | -1.76049800 | 3.92266900 |
| H  | -2.08823300 | -2.29978700 | 3.17258000 |
| C  | -3.67460800 | -1.01117000 | 4.82876900 |
| H  | -4.31470400 | -0.16856500 | 5.10706500 |
| H  | -3.60913600 | -1.67969500 | 5.69346000 |
| H  | -4.17602600 | -1.54831100 | 4.01559600 |
| C  | -2.45414900 | 0.46362300  | 3.20774000 |
| H  | -1.49655200 | 0.80635800  | 2.80523000 |

|                                                                 |             |             |             |
|-----------------------------------------------------------------|-------------|-------------|-------------|
| H                                                               | -3.03889900 | 1.33580900  | 3.51814400  |
| H                                                               | -3.00152400 | -0.01848500 | 2.39262900  |
| H                                                               | -1.72275900 | -3.39302000 | 5.02458100  |
| C                                                               | 4.02669600  | 2.24703100  | 3.86169900  |
| H                                                               | 3.69466600  | 1.30144200  | 3.42480800  |
| H                                                               | 4.61709700  | 2.79013400  | 3.11680600  |
| H                                                               | 4.70102800  | 2.00904200  | 4.69396600  |
| C                                                               | 3.55922600  | -1.67377500 | 3.61947700  |
| H                                                               | 2.99496700  | -1.08757700 | 2.88647900  |
| H                                                               | 4.57281000  | -1.25616600 | 3.66263500  |
| H                                                               | 3.65315700  | -2.70125600 | 3.25453800  |
| H                                                               | 0.36880000  | -2.11656700 | 3.53553200  |
| [Zn <sub>2</sub> (L <sup>1</sup> ) <sub>2</sub> ] <sup>2+</sup> |             |             |             |
| Zn                                                              | -1.50473000 | -0.39651500 | 0.37385900  |
| N                                                               | -2.59100000 | 0.56173100  | 2.02073500  |
| N                                                               | -2.99747700 | 0.92114500  | -0.63151100 |
| N                                                               | -2.93892900 | -1.86854800 | -0.06581600 |
| O                                                               | -0.27868800 | -0.47367000 | -1.24955700 |
| C                                                               | -2.66986100 | 0.13311300  | 3.29919600  |
| C                                                               | -3.09595800 | 0.99753500  | 4.31261500  |
| H                                                               | -3.14009800 | 0.64443200  | 5.33779300  |
| C                                                               | -3.48929400 | 2.29439400  | 3.98630100  |
| H                                                               | -3.82621800 | 2.97658100  | 4.76102100  |
| C                                                               | -3.48559900 | 2.69319100  | 2.64870900  |
| H                                                               | -3.83740300 | 3.67700900  | 2.35403500  |
| C                                                               | -3.02807200 | 1.79324500  | 1.69099500  |
| C                                                               | -3.02448900 | 2.13835300  | 0.21117800  |
| H                                                               | -3.90229600 | 2.76061800  | -0.02062800 |
| H                                                               | -2.14040600 | 2.73404500  | -0.02749100 |
| C                                                               | -4.25869700 | 0.14610300  | -0.46712300 |
| H                                                               | -5.03081300 | 0.50992300  | -1.15612100 |
| H                                                               | -4.63903700 | 0.30713400  | 0.54535700  |
| C                                                               | -4.05100400 | -1.34618500 | -0.63466800 |
| C                                                               | -5.00157300 | -2.15002900 | -1.25198000 |
| H                                                               | -5.87836600 | -1.70453600 | -1.71076400 |
| C                                                               | -4.80732600 | -3.53391200 | -1.26055300 |
| H                                                               | -5.53075500 | -4.18653200 | -1.73984200 |
| C                                                               | -3.68156100 | -4.06475700 | -0.63995200 |
| H                                                               | -3.51353200 | -5.13646400 | -0.61301500 |
| C                                                               | -2.75362000 | -3.20479800 | -0.04028400 |
| C                                                               | -2.81260600 | 1.24495900  | -2.08302200 |
| H                                                               | -3.32278800 | 2.19724500  | -2.29304600 |
| H                                                               | -3.35238000 | 0.47243000  | -2.63896300 |
| C                                                               | -1.37954200 | 1.27678500  | -2.65133100 |

|    |             |             |             |
|----|-------------|-------------|-------------|
| C  | -0.71674300 | -0.11818700 | -2.54380100 |
| H  | -1.42737200 | -0.87832700 | -2.90717700 |
| H  | 0.13220700  | -0.12641400 | -3.23411100 |
| Zn | 1.51530000  | -0.36184300 | -0.39550400 |
| N  | 2.59343100  | 0.66370000  | -2.00864900 |
| N  | 2.99208500  | 0.94011000  | 0.65468400  |
| N  | 2.97036300  | -1.82915500 | -0.00570200 |
| O  | 0.29185600  | -0.51202300 | 1.22246500  |
| C  | 2.67942900  | 0.27888700  | -3.30051700 |
| C  | 3.09448300  | 1.18236800  | -4.28387500 |
| H  | 3.14438900  | 0.86442600  | -5.32022300 |
| C  | 3.46921700  | 2.47308500  | -3.91384700 |
| H  | 3.79733600  | 3.18530400  | -4.66496000 |
| C  | 3.45852800  | 2.82717000  | -2.56383800 |
| H  | 3.79623300  | 3.80548400  | -2.23618900 |
| C  | 3.01248500  | 1.88953200  | -1.63728900 |
| C  | 3.00199800  | 2.18479800  | -0.14692000 |
| H  | 3.87016400  | 2.81205400  | 0.10684600  |
| H  | 2.10890700  | 2.75916600  | 0.10991700  |
| C  | 4.26365100  | 0.18799100  | 0.46539400  |
| H  | 5.02989500  | 0.53747100  | 1.16823400  |
| H  | 4.64342000  | 0.38976000  | -0.53995200 |
| C  | 4.07585800  | -1.31201600 | 0.58028500  |
| C  | 5.03773200  | -2.12411700 | 1.16866600  |
| H  | 5.90883700  | -1.68319300 | 1.64245500  |
| C  | 4.86235700  | -3.50997400 | 1.12864500  |
| H  | 5.59506800  | -4.16913400 | 1.58430600  |
| C  | 3.74317100  | -4.03396300 | 0.49048300  |
| H  | 3.58957100  | -5.10624300 | 0.42605900  |
| C  | 2.80304900  | -3.16604900 | -0.07798000 |
| C  | 2.80208500  | 1.21264800  | 2.11600500  |
| H  | 3.29907500  | 2.16416000  | 2.35840500  |
| H  | 3.35196100  | 0.42938700  | 2.64650300  |
| C  | 1.36837700  | 1.20485300  | 2.68388900  |
| C  | 0.72617800  | -0.19525800 | 2.52775600  |
| H  | 1.44857600  | -0.95704700 | 2.86350000  |
| H  | -0.12183600 | -0.24038300 | 3.21766500  |
| C  | -2.37830300 | -1.31967200 | 3.56883800  |
| H  | -1.67812700 | -1.72971600 | 2.83788900  |
| H  | -1.97405200 | -1.47104600 | 4.57348000  |
| H  | -3.30979300 | -1.89612400 | 3.49610500  |
| C  | -1.56058400 | -3.74005100 | 0.70394600  |
| H  | -0.77303800 | -2.98842000 | 0.80590900  |
| H  | -1.86185700 | -4.04780600 | 1.71351700  |

|                                                                 |             |             |             |
|-----------------------------------------------------------------|-------------|-------------|-------------|
| H                                                               | -1.14967800 | -4.62236200 | 0.20604100  |
| C                                                               | 2.40669700  | -1.16793400 | -3.61727600 |
| H                                                               | 1.70187500  | -1.60634200 | -2.90752100 |
| H                                                               | 2.01628800  | -1.29325700 | -4.63088000 |
| H                                                               | 3.34312500  | -1.73690300 | -3.54945300 |
| C                                                               | 1.61631900  | -3.69070900 | -0.83952700 |
| H                                                               | 0.81973400  | -2.94563700 | -0.91592600 |
| H                                                               | 1.92078700  | -3.96052300 | -1.85892600 |
| H                                                               | 1.21654900  | -4.59429800 | -0.37158900 |
| C                                                               | 1.51053800  | 1.48172600  | 4.19605200  |
| H                                                               | 1.99581300  | 2.44609000  | 4.38268900  |
| H                                                               | 0.52474600  | 1.50989200  | 4.67330800  |
| H                                                               | 2.10240700  | 0.70522800  | 4.69579200  |
| C                                                               | 0.46523700  | 2.27619500  | 2.06002900  |
| H                                                               | -0.48824800 | 2.32459500  | 2.59547500  |
| H                                                               | 0.92495200  | 3.26992700  | 2.11184900  |
| H                                                               | 0.23989500  | 2.04391300  | 1.01521900  |
| C                                                               | -1.52620800 | 1.60424800  | -4.15298300 |
| H                                                               | -2.02580600 | 2.56727100  | -4.30589400 |
| H                                                               | -0.54099700 | 1.66345100  | -4.62865200 |
| H                                                               | -2.10679500 | 0.83706300  | -4.67962000 |
| C                                                               | -0.49097100 | 2.33779600  | -1.99015400 |
| H                                                               | 0.46335800  | 2.41510900  | -2.52088000 |
| H                                                               | -0.96255400 | 3.32709600  | -2.01029300 |
| H                                                               | -0.26594800 | 2.07325100  | -0.95302900 |
| [Zn <sub>2</sub> (L <sup>2</sup> ) <sub>2</sub> ] <sup>2+</sup> |             |             |             |
| Zn                                                              | -0.13598400 | -0.34796600 | 0.90679100  |
| N                                                               | -2.04024800 | -1.03570700 | 0.00955400  |
| N                                                               | -0.31875400 | 0.85615800  | -0.92014200 |
| N                                                               | 1.14051100  | -1.51908500 | -0.24178200 |
| O                                                               | 1.10658700  | 1.06911100  | 1.80449700  |
| O                                                               | 2.87939700  | 1.66557900  | 0.54943700  |
| C                                                               | -2.69343600 | -2.20173600 | 0.22436800  |
| C                                                               | -4.00739800 | -2.37557400 | -0.22065300 |
| H                                                               | -4.51896300 | -3.31289300 | -0.02745300 |
| C                                                               | -4.63321500 | -1.35603700 | -0.93510100 |
| H                                                               | -5.65270500 | -1.47735000 | -1.28859100 |
| C                                                               | -3.91601000 | -0.19728900 | -1.23069600 |
| H                                                               | -4.34779400 | 0.59248900  | -1.83769300 |
| C                                                               | -2.61725500 | -0.07727700 | -0.74334900 |
| C                                                               | -1.76526100 | 1.13166400  | -1.08478900 |
| H                                                               | -1.98491400 | 1.45036600  | -2.11501800 |
| H                                                               | -2.02958600 | 1.96731100  | -0.43537100 |
| C                                                               | 0.14413500  | -0.10740800 | -1.96134300 |

|    |             |             |             |
|----|-------------|-------------|-------------|
| H  | 0.42952500  | 0.42308800  | -2.87756100 |
| H  | -0.69483100 | -0.76037200 | -2.22063900 |
| C  | 1.26936500  | -1.00765100 | -1.48717300 |
| C  | 2.30798500  | -1.38800900 | -2.32749800 |
| H  | 2.39838300  | -0.95349900 | -3.31768000 |
| C  | 3.21914700  | -2.34438300 | -1.87218800 |
| H  | 4.04678800  | -2.65588400 | -2.50231200 |
| C  | 3.04202900  | -2.90900900 | -0.61262300 |
| H  | 3.71312800  | -3.68086700 | -0.25029500 |
| C  | 1.98019700  | -2.48323300 | 0.19312900  |
| C  | 0.49142000  | 2.11063300  | -1.02835200 |
| H  | 0.02805500  | 2.75261400  | -1.79197500 |
| H  | 1.47045400  | 1.81051300  | -1.40698600 |
| C  | 0.75220100  | 2.92629000  | 0.25114700  |
| C  | 1.70437300  | 2.15898600  | 1.21191100  |
| H  | 2.01022900  | 2.88349700  | 1.98156800  |
| C  | 1.45288300  | 4.22609800  | -0.20104300 |
| H  | 0.77327700  | 4.85554400  | -0.78497000 |
| H  | 2.32966900  | 4.02944600  | -0.82980600 |
| H  | 1.77904000  | 4.81261700  | 0.66586300  |
| C  | -0.50914000 | 3.29729400  | 1.04765700  |
| H  | -1.02805700 | 2.40925000  | 1.42027000  |
| H  | -1.20194500 | 3.89688500  | 0.44678200  |
| H  | -0.23438800 | 3.89908000  | 1.92319200  |
| H  | 3.46489000  | 2.40314300  | 0.31446200  |
| C  | -1.92949100 | -3.33428800 | 0.85555300  |
| H  | -1.15197500 | -2.98293000 | 1.53361200  |
| H  | -2.59465000 | -4.00933600 | 1.40200200  |
| H  | -1.44263600 | -3.92273600 | 0.06666100  |
| C  | 1.67984700  | -3.13103900 | 1.51749200  |
| H  | 1.21613700  | -2.43964200 | 2.22625000  |
| H  | 0.97474100  | -3.95709500 | 1.36491100  |
| H  | 2.57834200  | -3.55812500 | 1.96766500  |
| Zn | 0.95953500  | 0.64671000  | 3.72412000  |
| N  | 1.64498000  | 2.51818300  | 4.68521900  |
| N  | -0.15131100 | 0.69847000  | 5.61536900  |
| N  | 2.22287100  | -0.65703700 | 4.74482200  |
| O  | -0.47906100 | -0.57720100 | 2.83415300  |
| O  | -0.96093400 | -2.43525700 | 4.01388900  |
| C  | 2.78331800  | 3.21168800  | 4.44941900  |
| C  | 2.95159000  | 4.50181300  | 4.96154300  |
| H  | 3.86581700  | 5.04697300  | 4.75034500  |
| C  | 1.95886900  | 5.05911700  | 5.76458400  |
| H  | 2.07684600  | 6.05885800  | 6.17153900  |



|                                                                 |             |             |             |
|-----------------------------------------------------------------|-------------|-------------|-------------|
| C                                                               | 0.83361600  | 4.29702700  | 6.07719100  |
| H                                                               | 0.06847000  | 4.67275400  | 6.74946000  |
| C                                                               | 0.71558600  | 3.02667100  | 5.51995500  |
| C                                                               | -0.45460500 | 2.12613700  | 5.87115400  |
| H                                                               | -0.72914500 | 2.28244100  | 6.92536300  |
| H                                                               | -1.32634900 | 2.40114500  | 5.27596900  |
| C                                                               | 0.87504000  | 0.20879100  | 6.58170200  |
| H                                                               | 0.39862200  | -0.13690400 | 7.50688800  |
| H                                                               | 1.52049400  | 1.04994400  | 6.85244400  |
| C                                                               | 1.77616300  | -0.86652100 | 6.00423500  |
| C                                                               | 2.21889300  | -1.93997900 | 6.76632800  |
| H                                                               | 1.83453000  | -2.09489700 | 7.76913500  |
| C                                                               | 3.17146500  | -2.80162500 | 6.21621100  |
| H                                                               | 3.53086800  | -3.65483700 | 6.78361000  |
| C                                                               | 3.67033600  | -2.54181200 | 4.94335600  |
| H                                                               | 4.43838100  | -3.17239800 | 4.50769400  |
| C                                                               | 3.18260100  | -1.44833700 | 4.21893200  |
| C                                                               | -1.37675100 | -0.15183200 | 5.74465300  |
| H                                                               | -1.98624300 | 0.24921700  | 6.56791100  |
| H                                                               | -1.03006900 | -1.14139500 | 6.04903800  |
| C                                                               | -2.25716100 | -0.36613400 | 4.50014000  |
| C                                                               | -1.51935100 | -1.23957500 | 3.44643900  |
| H                                                               | -2.27517100 | -1.52237800 | 2.69835300  |
| C                                                               | -3.50768000 | -1.13154700 | 4.98612000  |
| H                                                               | -4.11927700 | -0.50521500 | 5.64390300  |
| H                                                               | -3.24877100 | -2.03539600 | 5.55062500  |
| H                                                               | -4.13636000 | -1.42662200 | 4.13779100  |
| C                                                               | -2.71262700 | 0.92392500  | 3.79948700  |
| H                                                               | -1.86658100 | 1.49100500  | 3.40060000  |
| H                                                               | -3.29159100 | 1.56427300  | 4.47446700  |
| H                                                               | -3.36203200 | 0.67796900  | 2.94974800  |
| H                                                               | -1.66991500 | -3.05360400 | 4.25280400  |
| C                                                               | 3.89881100  | 2.51521600  | 3.71769000  |
| H                                                               | 3.53161000  | 1.75412400  | 3.02983100  |
| H                                                               | 4.51626600  | 3.22569500  | 3.16022200  |
| H                                                               | 4.55139900  | 2.01789700  | 4.44741800  |
| C                                                               | 3.75793800  | -1.06173100 | 2.88358900  |
| H                                                               | 3.02099100  | -0.58201200 | 2.23388500  |
| H                                                               | 4.57180400  | -0.34220300 | 3.03440000  |
| H                                                               | 4.18657200  | -1.92322300 | 2.36726800  |
| [Zn <sub>2</sub> (L <sup>3</sup> ) <sub>2</sub> ] <sup>2+</sup> |             |             |             |
| Zn                                                              | -1.67036500 | -0.21915800 | 0.35498400  |
| N                                                               | -1.86917100 | 2.00711400  | 0.54338000  |
| N                                                               | -3.54626200 | 0.22316600  | -0.72013000 |

|    |             |             |             |
|----|-------------|-------------|-------------|
| N  | -3.11439400 | -1.49875200 | 1.33621100  |
| C  | -1.24057700 | 2.84217400  | 1.40755400  |
| C  | -1.46513000 | 4.22315200  | 1.36131100  |
| H  | -0.95038900 | 4.86788900  | 2.06557400  |
| C  | -2.35459200 | 4.75364100  | 0.43220100  |
| H  | -2.54490600 | 5.82211900  | 0.39584100  |
| C  | -3.01348300 | 3.88557200  | -0.43618900 |
| H  | -3.73175400 | 4.25245000  | -1.16256800 |
| C  | -2.74170000 | 2.52355000  | -0.35093100 |
| C  | -3.39333600 | 1.55405800  | -1.31615000 |
| H  | -4.35138200 | 1.95778600  | -1.67546600 |
| H  | -2.73701700 | 1.45597100  | -2.18297200 |
| C  | -4.54272000 | 0.22330900  | 0.37407800  |
| H  | -5.56803800 | 0.25449400  | -0.02213600 |
| H  | -4.39519500 | 1.13314100  | 0.96579900  |
| C  | -4.36374700 | -0.98975200 | 1.26821800  |
| C  | -5.43375400 | -1.54586700 | 1.95819200  |
| H  | -6.42523500 | -1.11255500 | 1.87300600  |
| C  | -5.20121000 | -2.67663900 | 2.74222200  |
| H  | -6.01197000 | -3.13651000 | 3.29912100  |
| C  | -3.92493900 | -3.23063900 | 2.76714600  |
| H  | -3.72617600 | -4.13690400 | 3.32954400  |
| C  | -2.88735000 | -2.63094400 | 2.04289700  |
| C  | -3.85661200 | -0.86306000 | -1.68552700 |
| H  | -4.85670200 | -0.69614500 | -2.11399000 |
| H  | -3.92001300 | -1.77018700 | -1.08186300 |
| C  | -2.87860000 | -1.13562300 | -2.86123700 |
| C  | -3.04693600 | -2.64190700 | -3.21523000 |
| H  | -4.09611900 | -2.86110100 | -3.44447600 |
| H  | -2.73202000 | -3.28094100 | -2.38317900 |
| H  | -2.45287300 | -2.90509200 | -4.09618000 |
| C  | -3.25809600 | -0.32599900 | -4.13079600 |
| H  | -3.17440500 | 0.75580400  | -3.99635400 |
| H  | -4.28979100 | -0.55035200 | -4.42081100 |
| H  | -2.61244900 | -0.60329200 | -4.97043400 |
| C  | -1.40608100 | -0.92742000 | -2.59233900 |
| H  | -0.74840100 | -1.05724000 | -3.45540800 |
| N  | -0.81965300 | -0.67478400 | -1.47223200 |
| O  | 0.53228400  | -0.61398700 | -1.54986400 |
| Zn | 1.86466900  | -0.21049400 | -0.17525100 |
| N  | 2.05216300  | 2.01679200  | -0.36256200 |
| N  | 3.73829000  | 0.24100500  | 0.90002600  |
| N  | 3.31547700  | -1.48184900 | -1.15748800 |
| C  | 1.41932700  | 2.84893400  | -1.22642100 |

|   |             |             |             |
|---|-------------|-------------|-------------|
| C | 1.63664600  | 4.23104100  | -1.17952100 |
| H | 1.11863900  | 4.87340400  | -1.88356100 |
| C | 2.52318700  | 4.76570800  | -0.25001100 |
| H | 2.70790200  | 5.83515100  | -0.21310000 |
| C | 3.18648700  | 3.90069300  | 0.61808800  |
| H | 3.90269600  | 4.27100400  | 1.34475900  |
| C | 2.92185000  | 2.53731200  | 0.53213900  |
| C | 3.57833500  | 1.57065700  | 1.49691100  |
| H | 4.53416800  | 1.97915900  | 1.85670700  |
| H | 2.92230200  | 1.46853000  | 2.36348200  |
| C | 4.73478700  | 0.24700900  | -0.19410800 |
| H | 5.75989800  | 0.28309200  | 0.20222500  |
| H | 4.58267200  | 1.15653700  | -0.78513100 |
| C | 4.56211200  | -0.96625600 | -1.08918800 |
| C | 5.63502200  | -1.51605800 | -1.77970900 |
| H | 6.62416900  | -1.07749600 | -1.69424700 |
| C | 5.40847700  | -2.64741400 | -2.56464600 |
| H | 6.22163600  | -3.10246700 | -3.12200500 |
| C | 4.13519300  | -3.20822100 | -2.58989200 |
| H | 3.94124300  | -4.11509200 | -3.15299100 |
| C | 3.09446300  | -2.61469300 | -1.86505800 |
| C | 4.05396200  | -0.84437300 | 1.86464000  |
| H | 5.05331700  | -0.67304500 | 2.29306500  |
| H | 4.12150100  | -1.75082500 | 1.26042100  |
| C | 3.07743900  | -1.12216300 | 3.04037800  |
| C | 3.25252300  | -2.62790000 | 3.39338100  |
| H | 4.30272100  | -2.84269900 | 3.62215500  |
| H | 2.94013200  | -3.26778200 | 2.56102700  |
| H | 2.65989900  | -2.89423800 | 4.27435500  |
| C | 3.45369700  | -0.31157400 | 4.31029900  |
| H | 3.36563700  | 0.76994000  | 4.17630300  |
| H | 4.48632100  | -0.53184700 | 4.60012800  |
| H | 2.80927000  | -0.59186000 | 5.14987700  |
| C | 1.60391700  | -0.92035400 | 2.77196600  |
| H | 0.94706000  | -1.05290100 | 3.63524800  |
| N | 1.01611700  | -0.67049800 | 1.65195100  |
| O | -0.33600100 | -0.61536400 | 1.72978500  |
| C | 1.72746900  | -3.24230900 | -1.82947600 |
| H | 1.24834500  | -3.07679400 | -0.86103000 |
| H | 1.07761800  | -2.79082400 | -2.58487100 |
| H | 1.79757100  | -4.31679200 | -2.02043800 |
| C | 0.47466400  | 2.26296300  | -2.23695500 |
| H | 0.93738200  | 1.43483500  | -2.77901600 |
| H | -0.40183400 | 1.84766000  | -1.73467900 |

|                    |             |             |             |
|--------------------|-------------|-------------|-------------|
| H                  | 0.14645900  | 3.02850600  | -2.94432100 |
| C                  | -1.51694900 | -3.25108400 | 2.00692900  |
| H                  | -1.03914200 | -3.08320300 | 1.03822600  |
| H                  | -0.86927400 | -2.79586900 | 2.76195000  |
| H                  | -1.58107800 | -4.32589300 | 2.19811400  |
| C                  | -0.29287400 | 2.26080100  | 2.41790900  |
| H                  | -0.75159800 | 1.43061100  | 2.96020700  |
| H                  | 0.58548200  | 1.84954000  | 1.91556300  |
| H                  | 0.03180200  | 3.02799800  | 3.12510900  |
| 1-AC <sub>SB</sub> |             |             |             |
| Zn                 | -0.43515700 | -1.35113400 | -0.27147900 |
| N                  | -0.66517900 | -2.79426300 | -1.99820600 |
| N                  | -1.01100100 | -3.36434800 | 0.66969400  |
| N                  | -2.75797900 | -1.20445100 | 0.21673900  |
| O                  | -0.36280100 | -0.50374100 | 1.70496200  |
| C                  | -0.75137700 | -2.50226900 | -3.31073700 |
| C                  | -0.32759700 | -3.42241200 | -4.27611500 |
| H                  | -0.39693500 | -3.16868300 | -5.32900400 |
| C                  | 0.17286400  | -4.65707200 | -3.86743400 |
| H                  | 0.50476300  | -5.38509100 | -4.60248600 |
| C                  | 0.23018400  | -4.95420200 | -2.50670900 |
| H                  | 0.59944500  | -5.91241500 | -2.15389300 |
| C                  | -0.19113000 | -3.98701300 | -1.59570900 |
| C                  | -0.10771200 | -4.24031500 | -0.09988700 |
| H                  | -0.31810500 | -5.30392800 | 0.10479200  |
| H                  | 0.91339300  | -4.01164200 | 0.21208000  |
| C                  | -2.42090900 | -3.60624000 | 0.29552600  |
| H                  | -2.82318800 | -4.49332000 | 0.80797700  |
| H                  | -2.46812000 | -3.80474100 | -0.77696900 |
| C                  | -3.27538700 | -2.39274100 | 0.58208700  |
| C                  | -4.53022500 | -2.51940500 | 1.17488300  |
| H                  | -4.89945000 | -3.49954700 | 1.46095300  |
| C                  | -5.28420600 | -1.36706700 | 1.39195100  |
| H                  | -6.26744500 | -1.42641600 | 1.85034400  |
| C                  | -4.74683100 | -0.13869900 | 1.02578500  |
| H                  | -5.29616100 | 0.78196900  | 1.19407900  |
| C                  | -3.47046100 | -0.08057500 | 0.44621800  |
| C                  | -0.86238900 | -3.54402500 | 2.14694000  |
| H                  | -0.58424900 | -4.59320200 | 2.33695900  |
| H                  | -1.86212700 | -3.40874900 | 2.57348200  |
| C                  | 0.08457100  | -2.62746100 | 2.96360600  |
| C                  | -0.40802000 | -1.16393100 | 2.96896700  |
| H                  | 0.19066700  | -0.59120600 | 3.68762700  |
| P                  | 0.90180300  | 1.42388500  | -0.65768700 |

|   |             |             |             |
|---|-------------|-------------|-------------|
| O | -0.20021500 | 0.52566200  | -1.20616700 |
| O | 2.27939800  | 1.12055000  | -1.48262600 |
| O | 0.63511100  | 2.94196200  | -1.28334700 |
| O | 1.12232100  | 1.50179900  | 0.83019300  |
| C | 3.52381400  | 1.19486800  | -0.87850600 |
| C | 3.90273700  | 0.23219700  | 0.06264500  |
| C | 4.38915200  | 2.21394100  | -1.28239000 |
| C | 5.17736100  | 0.29969800  | 0.61282000  |
| H | 3.19236000  | -0.54959200 | 0.32177900  |
| C | 5.66584100  | 2.28126900  | -0.73398700 |
| H | 4.05019600  | 2.93688200  | -2.01657700 |
| C | 6.04244700  | 1.32258400  | 0.21039600  |
| H | 5.50966200  | -0.42791100 | 1.34293900  |
| H | 6.36293500  | 3.05859900  | -1.02090800 |
| C | -0.48398800 | 3.64387800  | -0.90711300 |
| C | -1.41110600 | 3.97538800  | -1.90225000 |
| C | -0.67898000 | 4.04272200  | 0.42301400  |
| C | -2.55523000 | 4.69004100  | -1.56990300 |
| H | -1.22236500 | 3.65346100  | -2.92050700 |
| C | -1.82498100 | 4.75311700  | 0.76071300  |
| H | 0.05848000  | 3.77076700  | 1.16908600  |
| C | -2.75467700 | 5.06137500  | -0.23690600 |
| H | -3.29435100 | 4.95051900  | -2.31737100 |
| H | -2.00888000 | 5.06609200  | 1.78114000  |
| N | 7.38729100  | 1.39007400  | 0.79260400  |
| O | 8.14063700  | 2.29257800  | 0.41386300  |
| O | 7.69992000  | 0.54128100  | 1.63327000  |
| N | -3.97897400 | 5.78053500  | 0.12620100  |
| O | -4.15213800 | 6.06932500  | 1.31434900  |
| O | -4.78143900 | 6.05221300  | -0.77259300 |
| C | -1.31596900 | -1.15490800 | -3.66733600 |
| H | -2.31187100 | -1.03595200 | -3.22389400 |
| H | -0.69154200 | -0.35991300 | -3.24641900 |
| H | -1.39378600 | -1.02703800 | -4.75055800 |
| C | -2.84144000 | 1.23633200  | 0.10446200  |
| H | -3.54111200 | 2.06324900  | 0.25250900  |
| H | -1.96674400 | 1.39405000  | 0.74247100  |
| H | -2.47526100 | 1.24739700  | -0.92344400 |
| H | 0.33502800  | 0.20009700  | 1.63394400  |
| O | 1.47963100  | -1.75172100 | -0.37553300 |
| H | 1.79951400  | -1.55674400 | -1.26963900 |
| C | 1.55239600  | -2.71428500 | 2.52338100  |
| H | 1.70675500  | -2.33129100 | 1.51133200  |
| H | 2.18015300  | -2.13179700 | 3.21001300  |

|                     |             |             |             |
|---------------------|-------------|-------------|-------------|
| H                   | 1.90232400  | -3.75429500 | 2.56439200  |
| C                   | -0.03387300 | -3.12189200 | 4.42465600  |
| H                   | 0.29971200  | -4.16221900 | 4.51176400  |
| H                   | 0.59767800  | -2.51811800 | 5.08559600  |
| H                   | -1.06437500 | -3.06498000 | 4.79896500  |
| H                   | -1.45287400 | -1.13351400 | 3.30803000  |
| 1-TS1 <sub>SB</sub> |             |             |             |
| Zn                  | -1.42650700 | -0.86038400 | -0.12555000 |
| N                   | -1.63736500 | -2.54584500 | -1.55438000 |
| N                   | -3.13210100 | -2.11505100 | 0.70495400  |
| N                   | -3.22884400 | 0.35291200  | -0.62047500 |
| C                   | -1.05171800 | -2.63541900 | -2.76557900 |
| C                   | -0.78962300 | -3.88586600 | -3.33586700 |
| H                   | -0.31362300 | -3.94168800 | -4.30931100 |
| C                   | -1.14489700 | -5.04238300 | -2.64587100 |
| H                   | -0.94765800 | -6.02049200 | -3.07554500 |
| C                   | -1.76642700 | -4.93152700 | -1.40318500 |
| H                   | -2.06824100 | -5.81068600 | -0.84177100 |
| C                   | -1.98555500 | -3.65705800 | -0.88596100 |
| C                   | -2.60969600 | -3.47717800 | 0.48891100  |
| H                   | -3.39958300 | -4.23254800 | 0.63771400  |
| H                   | -1.83517400 | -3.65798400 | 1.23735300  |
| C                   | -4.23895300 | -1.81742400 | -0.23569200 |
| H                   | -5.18560100 | -2.25326000 | 0.11612900  |
| H                   | -4.00773400 | -2.27552100 | -1.19974700 |
| C                   | -4.37998500 | -0.32507000 | -0.44426100 |
| C                   | -5.62501800 | 0.29545100  | -0.46872200 |
| H                   | -6.52767600 | -0.28711800 | -0.31268000 |
| C                   | -5.67630600 | 1.67244300  | -0.69076600 |
| H                   | -6.62995700 | 2.19222800  | -0.71521700 |
| C                   | -4.48768500 | 2.37081900  | -0.86618200 |
| H                   | -4.49061000 | 3.44367200  | -1.02807100 |
| C                   | -3.26158600 | 1.68927500  | -0.82038700 |
| C                   | -3.62095100 | -1.90087900 | 2.10276900  |
| H                   | -4.04444500 | -2.85171500 | 2.46501300  |
| H                   | -4.45758700 | -1.19836200 | 2.03019300  |
| C                   | -2.66922700 | -1.33409200 | 3.18532300  |
| C                   | -2.26103600 | 0.12604900  | 2.88010800  |
| H                   | -1.75635400 | 0.54465400  | 3.76052000  |
| P                   | 1.28206600  | 0.04226400  | 0.06892100  |
| O                   | 0.08821900  | 0.25286800  | -0.89117100 |
| O                   | 2.45722200  | -0.96118000 | -0.52396300 |
| O                   | 2.21026500  | 1.42135500  | -0.44721700 |
| O                   | 1.20717700  | 0.27492200  | 1.57671000  |

|   |             |             |             |
|---|-------------|-------------|-------------|
| C | 3.77600600  | -0.94212800 | -0.18801900 |
| C | 4.27844300  | -0.35809600 | 0.98688100  |
| C | 4.63627600  | -1.60224700 | -1.07969800 |
| C | 5.63846800  | -0.43448400 | 1.25719500  |
| H | 3.60232400  | 0.14353900  | 1.66820100  |
| C | 5.99336100  | -1.68139100 | -0.80853900 |
| H | 4.21439400  | -2.04356900 | -1.97624600 |
| C | 6.48651000  | -1.09413100 | 0.36192000  |
| H | 6.05055800  | 0.00842100  | 2.15563900  |
| H | 6.67324100  | -2.18481200 | -1.48466900 |
| C | 1.64832900  | 2.64969100  | -0.38712200 |
| C | 1.50319800  | 3.37029200  | -1.58600000 |
| C | 1.22532500  | 3.22328000  | 0.82859800  |
| C | 0.91179500  | 4.62496400  | -1.58573900 |
| H | 1.84405500  | 2.90925700  | -2.50669500 |
| C | 0.62991700  | 4.47706900  | 0.83446100  |
| H | 1.35400900  | 2.65708600  | 1.74237500  |
| C | 0.46473200  | 5.16475800  | -0.37356400 |
| H | 0.77585700  | 5.18387700  | -2.50356100 |
| H | 0.28717000  | 4.92902300  | 1.75739000  |
| N | 7.91388300  | -1.17702800 | 0.65536100  |
| O | 8.64215300  | -1.76876700 | -0.15079900 |
| O | 8.32806700  | -0.65368900 | 1.69616500  |
| N | -0.20761800 | 6.45812500  | -0.37329800 |
| O | -0.60627800 | 6.91190200  | 0.70696700  |
| O | -0.36290400 | 7.03807600  | -1.45584800 |
| C | -0.70132700 | -1.34635100 | -3.45201000 |
| H | -1.58908600 | -0.70729900 | -3.53270800 |
| H | 0.02794200  | -0.79289100 | -2.85116500 |
| H | -0.30133000 | -1.52318600 | -4.45395000 |
| C | -1.95999200 | 2.41786200  | -0.96262600 |
| H | -2.12003600 | 3.47511900  | -1.18760400 |
| H | -1.38331400 | 2.33251500  | -0.03691500 |
| H | -1.33478600 | 1.96824600  | -1.73694500 |
| O | 0.27427500  | -1.84133900 | 0.42003900  |
| H | 0.54962900  | -2.03506200 | 1.32608700  |
| H | -0.44531000 | 0.29829000  | 1.94146900  |
| O | -1.42878300 | 0.30203600  | 1.74081100  |
| H | -3.16458600 | 0.72382400  | 2.70218900  |
| C | -1.42850200 | -2.20637200 | 3.40627700  |
| H | -1.70885900 | -3.23147600 | 3.67815600  |
| H | -0.81514200 | -2.23797900 | 2.50703100  |
| H | -0.81201700 | -1.80056200 | 4.21662200  |
| C | -3.49881900 | -1.29465000 | 4.48842700  |

|                    |             |             |             |
|--------------------|-------------|-------------|-------------|
| H                  | -2.89783000 | -0.89894300 | 5.31433100  |
| H                  | -4.38835100 | -0.66012700 | 4.38668600  |
| H                  | -3.83140300 | -2.29941500 | 4.77319000  |
| 1-IM <sub>SB</sub> |             |             |             |
| Zn                 | 1.65207600  | -0.68523300 | 0.09191300  |
| N                  | 2.09887800  | -2.18518100 | 1.63952500  |
| N                  | 3.36365500  | -1.90952800 | -0.77021600 |
| N                  | 3.30357800  | 0.69866800  | 0.26508400  |
| C                  | 1.60821100  | -2.16697400 | 2.89680100  |
| C                  | 1.50372900  | -3.35275100 | 3.63181900  |
| H                  | 1.10087000  | -3.32360100 | 4.63878100  |
| C                  | 1.92131200  | -4.55355500 | 3.06302500  |
| H                  | 1.84483100  | -5.48194500 | 3.62186600  |
| C                  | 2.45118200  | -4.54946300 | 1.77381700  |
| H                  | 2.80211900  | -5.46338900 | 1.30383200  |
| C                  | 2.51335300  | -3.33783200 | 1.09010400  |
| C                  | 3.03720500  | -3.28026800 | -0.33556700 |
| H                  | 3.91255900  | -3.94411100 | -0.43338300 |
| H                  | 2.26460100  | -3.66681600 | -1.00291000 |
| C                  | 4.51809300  | -1.38023100 | 0.00002700  |
| H                  | 5.46801600  | -1.75299600 | -0.40911800 |
| H                  | 4.44095700  | -1.74276000 | 1.02808200  |
| C                  | 4.50477000  | 0.13356300  | 0.03564400  |
| C                  | 5.66002100  | 0.89041800  | -0.12662700 |
| H                  | 6.61058300  | 0.40252600  | -0.31845100 |
| C                  | 5.55877900  | 2.28096000  | -0.04006400 |
| H                  | 6.43957200  | 2.90473000  | -0.16336800 |
| C                  | 4.31557200  | 2.85818800  | 0.19258800  |
| H                  | 4.20315700  | 3.93558100  | 0.25273100  |
| C                  | 3.18337400  | 2.04247000  | 0.33742900  |
| C                  | 3.68489200  | -1.84102600 | -2.23081800 |
| H                  | 4.19229800  | -2.77813400 | -2.51173200 |
| H                  | 4.42553800  | -1.04272800 | -2.34506600 |
| C                  | 2.55965300  | -1.54760800 | -3.25211600 |
| C                  | 2.01402200  | -0.11275300 | -3.08409600 |
| H                  | 1.37077800  | 0.12731600  | -3.94057900 |
| P                  | -1.17076400 | -0.45050300 | -0.05520700 |
| O                  | 0.01041700  | 0.15878600  | 0.78366000  |
| O                  | -2.30699500 | -1.44833800 | 0.67201400  |
| O                  | -2.25043200 | 0.91409300  | 0.42153300  |
| O                  | -1.25659800 | -0.28040100 | -1.58388100 |
| C                  | -3.66017700 | -1.30458400 | 0.58085000  |
| C                  | -4.30369800 | -0.92447000 | -0.60887200 |
| C                  | -4.40612100 | -1.64852000 | 1.71629600  |



|   |             |             |             |
|---|-------------|-------------|-------------|
| C | -5.68956900 | -0.88613900 | -0.65339200 |
| H | -3.70433000 | -0.65092700 | -1.46965700 |
| C | -5.79297300 | -1.61634000 | 1.67342100  |
| H | -3.87753800 | -1.93622200 | 2.61881500  |
| C | -6.42517000 | -1.23441700 | 0.48596100  |
| H | -6.21044900 | -0.59263000 | -1.55654600 |
| H | -6.38907400 | -1.87577000 | 2.53955800  |
| C | -1.85422200 | 2.17585800  | 0.22304000  |
| C | -1.74828600 | 3.02862900  | 1.34225400  |
| C | -1.55546400 | 2.68703600  | -1.06115600 |
| C | -1.31127900 | 4.33547000  | 1.20005400  |
| H | -1.99395300 | 2.62173200  | 2.31748200  |
| C | -1.11772900 | 3.99420800  | -1.20904500 |
| H | -1.65518300 | 2.02580400  | -1.91251200 |
| C | -0.98027200 | 4.80952500  | -0.07721400 |
| H | -1.20353300 | 4.98983100  | 2.05672700  |
| H | -0.87283700 | 4.39442100  | -2.18568200 |
| N | -7.88360400 | -1.20215400 | 0.43399700  |
| O | -8.51202300 | -1.51713300 | 1.45220900  |
| O | -8.42368300 | -0.86228000 | -0.62513900 |
| N | -0.45506900 | 6.15505100  | -0.22502400 |
| O | -0.14892300 | 6.54795100  | -1.36031600 |
| O | -0.31649300 | 6.84922500  | 0.79305400  |
| C | 1.19306000  | -0.83590900 | 3.45396800  |
| H | 2.02823400  | -0.12679900 | 3.39743100  |
| H | 0.38271100  | -0.41749200 | 2.84709300  |
| H | 0.87547800  | -0.92183200 | 4.49633900  |
| C | 1.81365100  | 2.61203500  | 0.54504900  |
| H | 1.84758700  | 3.69530100  | 0.68108800  |
| H | 1.17775700  | 2.38130400  | -0.31585100 |
| H | 1.31642800  | 2.15049800  | 1.40168700  |
| O | -0.13977800 | -1.98822500 | -0.15347900 |
| H | -0.52807700 | -2.54768300 | -0.84314700 |
| H | 0.28103800  | -0.04424000 | -1.98259100 |
| O | 1.28463600  | 0.10639100  | -1.88616600 |
| H | 2.84924600  | 0.60060600  | -3.08813800 |
| C | 1.40854000  | -2.55841000 | -3.18405500 |
| H | 1.76786300  | -3.58136200 | -3.35229100 |
| H | 0.91211600  | -2.50506200 | -2.21517300 |
| H | 0.65724400  | -2.33548400 | -3.94990400 |
| C | 3.22474800  | -1.61722700 | -4.64392500 |
| H | 2.49096000  | -1.40680100 | -5.42952800 |
| H | 4.04008500  | -0.88928000 | -4.74354000 |
| H | 3.63768500  | -2.61449100 | -4.83502500 |

1-TS2<sub>SB</sub>

|    |             |             |             |
|----|-------------|-------------|-------------|
| Zn | 1.76842900  | -0.66133500 | 0.04115300  |
| N  | 2.16280100  | -2.25356900 | 1.50868800  |
| N  | 3.39119700  | -1.90202300 | -0.89396800 |
| N  | 3.34554400  | 0.65113100  | 0.26842000  |
| O  | 1.23155700  | 0.07110400  | -1.86860300 |
| C  | 1.66882000  | -2.26299600 | 2.76664700  |
| C  | 1.51862800  | -3.47107900 | 3.45367100  |
| H  | 1.11608700  | -3.46841800 | 4.46119500  |
| C  | 1.89233200  | -4.66450600 | 2.83517000  |
| H  | 1.77622500  | -5.61064800 | 3.35594700  |
| C  | 2.42804100  | -4.63098600 | 1.54905900  |
| H  | 2.74266700  | -5.53863500 | 1.04309300  |
| C  | 2.54258300  | -3.39481000 | 0.91462500  |
| C  | 3.07073000  | -3.28985100 | -0.50480500 |
| H  | 3.94944500  | -3.94448500 | -0.62429000 |
| H  | 2.29566900  | -3.65420300 | -1.18119200 |
| C  | 4.57242200  | -1.39804100 | -0.14086000 |
| H  | 5.50868300  | -1.73892200 | -0.60386000 |
| H  | 4.53802300  | -1.81317100 | 0.87009200  |
| C  | 4.54704200  | 0.11401700  | -0.02649400 |
| C  | 5.67708000  | 0.90774900  | -0.17716500 |
| H  | 6.63336800  | 0.45697200  | -0.42257300 |
| C  | 5.54453100  | 2.29088100  | -0.01437400 |
| H  | 6.40763800  | 2.93938400  | -0.13380600 |
| C  | 4.29949400  | 2.83205500  | 0.28948800  |
| H  | 4.16533600  | 3.90183200  | 0.40889700  |
| C  | 3.19286800  | 1.98335200  | 0.42626900  |
| C  | 3.66922100  | -1.78757000 | -2.36231300 |
| H  | 4.18735400  | -2.70600700 | -2.68093300 |
| H  | 4.38951800  | -0.97012000 | -2.47283100 |
| C  | 2.50473400  | -1.49228800 | -3.33626400 |
| C  | 1.94046500  | -0.07761400 | -3.09650000 |
| H  | 1.26496700  | 0.18977200  | -3.91800500 |
| P  | -1.11762600 | -1.18038900 | -0.23171900 |
| O  | -0.05237300 | -0.47170500 | 0.66945300  |
| O  | -2.39069000 | -1.84417900 | 0.58815300  |
| O  | -2.29726100 | 0.59544300  | 0.23228400  |
| O  | -1.18096900 | -0.87518300 | -1.71821400 |
| C  | -3.72342200 | -1.57474800 | 0.42267100  |
| C  | -4.28373000 | -1.30967000 | -0.83448900 |
| C  | -4.52394600 | -1.67180200 | 1.56514300  |
| C  | -5.65651700 | -1.13942600 | -0.94103800 |
| H  | -3.63559900 | -1.21689800 | -1.69774900 |

|                    |             |             |             |
|--------------------|-------------|-------------|-------------|
| C                  | -5.89831100 | -1.50653900 | 1.46059400  |
| H                  | -4.05146500 | -1.86781100 | 2.52148800  |
| C                  | -6.45342000 | -1.24246200 | 0.20515500  |
| H                  | -6.11924800 | -0.92784700 | -1.89701900 |
| H                  | -6.54101000 | -1.57310100 | 2.32950800  |
| C                  | -1.84049400 | 1.77471900  | -0.03886500 |
| C                  | -1.71736600 | 2.75261600  | 0.99966000  |
| C                  | -1.43025600 | 2.17080000  | -1.35421900 |
| C                  | -1.14683600 | 3.98641900  | 0.76910900  |
| H                  | -2.06570800 | 2.47374400  | 1.98964300  |
| C                  | -0.86268900 | 3.40742300  | -1.58695600 |
| H                  | -1.56607400 | 1.45946800  | -2.15920100 |
| C                  | -0.68809400 | 4.31361800  | -0.52279500 |
| H                  | -1.02054300 | 4.70542500  | 1.57046300  |
| H                  | -0.52878100 | 3.69145800  | -2.57849900 |
| N                  | -7.90004700 | -1.07442300 | 0.08827000  |
| O                  | -8.58340800 | -1.16560900 | 1.11534800  |
| O                  | -8.37360800 | -0.85148600 | -1.03149500 |
| N                  | 0.04449400  | 5.52519400  | -0.73224000 |
| O                  | 0.42362300  | 5.81074400  | -1.88492100 |
| O                  | 0.31358300  | 6.24083300  | 0.25500300  |
| C                  | 1.28947700  | -0.93818000 | 3.36456700  |
| H                  | 2.10550800  | -0.21747100 | 3.23397300  |
| H                  | 0.41626300  | -0.53942900 | 2.83604700  |
| H                  | 1.06683500  | -1.02896600 | 4.43072100  |
| C                  | 1.80974300  | 2.47288500  | 0.72018900  |
| H                  | 1.78356400  | 3.55056400  | 0.88953600  |
| H                  | 1.14093200  | 2.23732700  | -0.11557600 |
| H                  | 1.39275600  | 1.96361000  | 1.59561000  |
| H                  | 0.25912000  | -0.20237400 | -1.96956000 |
| O                  | -0.34887400 | -2.71572900 | -0.31954200 |
| H                  | -0.48205600 | -3.20981500 | 0.50472700  |
| C                  | 1.37763200  | -2.53446500 | -3.28195600 |
| H                  | 0.85031200  | -2.54241500 | -2.32616400 |
| H                  | 0.62562400  | -2.31239200 | -4.04713600 |
| H                  | 1.76929100  | -3.53983400 | -3.48429400 |
| C                  | 3.13335400  | -1.49087900 | -4.74739200 |
| H                  | 3.56094700  | -2.47094100 | -4.98817000 |
| H                  | 2.37259700  | -1.26763300 | -5.50283000 |
| H                  | 3.92977900  | -0.74131100 | -4.84111000 |
| H                  | 2.75520500  | 0.65743500  | -3.08326900 |
| 1-PC <sub>SB</sub> |             |             |             |
| Zn                 | 1.53218700  | -1.18883100 | 0.24776200  |
| N                  | 2.60371000  | -2.78110400 | 1.21668800  |

|   |             |             |             |
|---|-------------|-------------|-------------|
| N | 3.43090500  | -1.26630100 | -0.96152500 |
| N | 2.35436300  | 0.63562000  | 0.83267800  |
| O | 0.79008200  | -1.90243400 | -1.57560500 |
| C | 2.35775700  | -3.29047200 | 2.44697400  |
| C | 3.10644400  | -4.36831500 | 2.93143800  |
| H | 2.89106200  | -4.76357900 | 3.91844700  |
| C | 4.12149200  | -4.91216200 | 2.15004200  |
| H | 4.71206000  | -5.74633000 | 2.51756700  |
| C | 4.38345900  | -4.35729300 | 0.89943300  |
| H | 5.18230400  | -4.73578700 | 0.26975400  |
| C | 3.59995200  | -3.29216200 | 0.46252600  |
| C | 3.81827100  | -2.68234000 | -0.90743500 |
| H | 4.86564300  | -2.82638000 | -1.21714100 |
| H | 3.19173500  | -3.22256100 | -1.61533300 |
| C | 4.32842700  | -0.43646800 | -0.12995400 |
| H | 5.23276700  | -0.15214700 | -0.68558400 |
| H | 4.65292800  | -1.03799800 | 0.72688300  |
| C | 3.63237400  | 0.79546600  | 0.40715500  |
| C | 4.30487100  | 2.00039400  | 0.51941200  |
| H | 5.30899300  | 2.10135500  | 0.12229500  |
| C | 3.64923900  | 3.07997600  | 1.11320500  |
| H | 4.13381200  | 4.04765900  | 1.18291800  |
| C | 2.36085000  | 2.90003200  | 1.59595400  |
| H | 1.81634200  | 3.71979900  | 2.04827700  |
| C | 1.71038700  | 1.67216600  | 1.42758000  |
| C | 3.41041500  | -0.71364900 | -2.35233200 |
| H | 4.39576800  | -0.90107600 | -2.81235800 |
| H | 3.30228400  | 0.36696400  | -2.22969400 |
| C | 2.30569000  | -1.17126300 | -3.34216400 |
| C | 0.92131200  | -1.00816100 | -2.70957100 |
| H | 0.14092600  | -1.25894200 | -3.43619800 |
| P | -1.60994100 | -1.83854700 | 0.56267300  |
| O | -0.26700600 | -1.31820900 | 1.08446200  |
| O | -2.59347200 | -0.53759800 | 0.68073800  |
| O | -3.19783500 | 3.59654900  | 0.77933300  |
| O | -1.63195000 | -2.49461100 | -0.79057800 |
| C | -3.93136400 | -0.49559000 | 0.31458800  |
| C | -4.61306500 | -1.59625400 | -0.22176400 |
| C | -4.56812700 | 0.73312400  | 0.51696600  |
| C | -5.95885600 | -1.46357500 | -0.54806800 |
| H | -4.10133300 | -2.53428800 | -0.39725600 |
| C | -5.91159300 | 0.86237400  | 0.18460200  |
| H | -4.01439400 | 1.59206200  | 0.88928000  |
| C | -6.59562700 | -0.23884900 | -0.33833800 |

|                    |             |             |             |
|--------------------|-------------|-------------|-------------|
| H                  | -6.51338700 | -2.29535500 | -0.96437700 |
| H                  | -6.42154600 | 1.80798400  | 0.32153500  |
| C                  | -2.11360700 | 3.57577700  | 0.14381500  |
| C                  | -1.05572900 | 4.54946300  | 0.37960800  |
| C                  | -1.82374700 | 2.57136100  | -0.87420500 |
| C                  | 0.16031600  | 4.46679100  | -0.24141400 |
| H                  | -1.27238400 | 5.34592600  | 1.08557800  |
| C                  | -0.59678300 | 2.48126900  | -1.47258700 |
| H                  | -2.61917100 | 1.88183900  | -1.13751000 |
| C                  | 0.43670900  | 3.40032900  | -1.14295000 |
| H                  | 0.94392500  | 5.19002500  | -0.04401900 |
| H                  | -0.39971700 | 1.72097200  | -2.21873100 |
| N                  | -8.01497100 | -0.10785000 | -0.68243800 |
| O                  | -8.56461400 | 0.97741000  | -0.47668500 |
| O                  | -8.59001000 | -1.09216000 | -1.15995300 |
| N                  | 1.72460200  | 3.22671700  | -1.65291500 |
| O                  | 1.98815200  | 2.17459000  | -2.31472900 |
| O                  | 2.61784300  | 4.07882600  | -1.42189000 |
| C                  | 1.26520000  | -2.67171100 | 3.27211600  |
| H                  | 1.28791000  | -1.58135900 | 3.19682000  |
| H                  | 0.28501000  | -2.98720500 | 2.90164700  |
| H                  | 1.36108500  | -2.96365700 | 4.32126500  |
| C                  | 0.29668300  | 1.48570800  | 1.89159200  |
| H                  | -0.06745300 | 2.38867100  | 2.38422300  |
| H                  | -0.36605500 | 1.27650600  | 1.04786700  |
| H                  | 0.21445800  | 0.63579500  | 2.57426900  |
| H                  | -0.16661500 | -2.18045900 | -1.44363700 |
| O                  | -2.23466700 | -2.87821400 | 1.65146500  |
| H                  | -2.45045500 | -2.43776300 | 2.49064100  |
| C                  | 2.47339100  | -2.60808800 | -3.88022000 |
| H                  | 2.12156100  | -3.36537900 | -3.17434400 |
| H                  | 1.87959300  | -2.73159800 | -4.79286000 |
| H                  | 3.51905500  | -2.81774200 | -4.13533100 |
| C                  | 2.39881300  | -0.19381600 | -4.53795700 |
| H                  | 3.37599500  | -0.28219600 | -5.02767000 |
| H                  | 1.63413900  | -0.43638200 | -5.28465600 |
| H                  | 2.26197700  | 0.84433500  | -4.22354600 |
| H                  | 0.78262300  | 0.02451400  | -2.37727200 |
| 2-AC <sub>SB</sub> |             |             |             |
| Zn                 | -0.42053300 | -1.39223200 | -0.34488500 |
| N                  | -0.66163100 | -2.83414900 | -2.03197100 |
| N                  | -1.00055900 | -3.36850200 | 0.65209400  |
| N                  | -2.77551800 | -1.20921400 | 0.11384600  |
| O                  | -0.36048900 | -0.53499800 | 1.65076100  |

|   |             |             |             |
|---|-------------|-------------|-------------|
| C | -0.76541600 | -2.56006600 | -3.34684900 |
| C | -0.39588100 | -3.51080600 | -4.30449500 |
| H | -0.47931300 | -3.27273600 | -5.35999400 |
| C | 0.06948100  | -4.75546700 | -3.88449300 |
| H | 0.35881100  | -5.50733700 | -4.61345700 |
| C | 0.14704400  | -5.03135500 | -2.52022700 |
| H | 0.49003200  | -5.99602000 | -2.15874500 |
| C | -0.22038200 | -4.03534900 | -1.61706600 |
| C | -0.11468600 | -4.26276600 | -0.11880000 |
| H | -0.32647500 | -5.32152400 | 0.10663800  |
| H | 0.91244700  | -4.03372700 | 0.17503400  |
| C | -2.41911700 | -3.59881400 | 0.29849300  |
| H | -2.82143300 | -4.47868000 | 0.82184900  |
| H | -2.48386300 | -3.80108100 | -0.77244400 |
| C | -3.25390700 | -2.37405900 | 0.59112000  |
| C | -4.44825400 | -2.46676700 | 1.30138300  |
| H | -4.78360600 | -3.42825600 | 1.67726200  |
| C | -5.18150200 | -1.30359700 | 1.52761900  |
| H | -6.11263800 | -1.33482900 | 2.08634600  |
| C | -4.69453900 | -0.10065900 | 1.02880000  |
| H | -5.23814700 | 0.82650900  | 1.18126300  |
| C | -3.48251900 | -0.07904400 | 0.32198900  |
| C | -0.83916200 | -3.54566300 | 2.13193900  |
| H | -0.52242800 | -4.58323800 | 2.31824100  |
| H | -1.83361500 | -3.43497800 | 2.56787000  |
| C | 0.08996500  | -2.60941500 | 2.94222400  |
| C | -0.41203400 | -1.14670800 | 2.92618000  |
| H | 0.21613800  | -0.55242400 | 3.60689300  |
| P | 0.89493700  | 1.41747200  | -0.66322200 |
| O | -0.19045800 | 0.51373400  | -1.23252200 |
| O | 2.28871500  | 1.12955100  | -1.46108800 |
| O | 0.63108200  | 2.94042700  | -1.27459100 |
| O | 1.08369000  | 1.48670700  | 0.83187600  |
| C | 3.52168600  | 1.20858400  | -0.83240700 |
| C | 3.89859200  | 0.22525600  | 0.08741000  |
| C | 4.37634600  | 2.25279600  | -1.19136000 |
| C | 5.16182400  | 0.29727100  | 0.66315700  |
| H | 3.19621000  | -0.57470500 | 0.31055600  |
| C | 5.64169800  | 2.32452900  | -0.61755100 |
| H | 4.03904400  | 2.99053500  | -1.91145500 |
| C | 6.01663600  | 1.34510800  | 0.30585500  |
| H | 5.49293100  | -0.44553500 | 1.37836100  |
| H | 6.33127100  | 3.12044900  | -0.86953200 |
| C | -0.47804000 | 3.64730600  | -0.87553500 |

|                     |             |             |             |
|---------------------|-------------|-------------|-------------|
| C                   | -1.43869700 | 3.95978400  | -1.84407200 |
| C                   | -0.62853200 | 4.06757900  | 0.45371800  |
| C                   | -2.57511900 | 4.67368100  | -1.48362200 |
| H                   | -1.28357500 | 3.62203800  | -2.86284200 |
| C                   | -1.76555200 | 4.77907600  | 0.81916000  |
| H                   | 0.13564100  | 3.81092300  | 1.17789000  |
| C                   | -2.73067300 | 5.06539800  | -0.15081900 |
| H                   | -3.34086400 | 4.91827100  | -2.20937500 |
| H                   | -1.91511800 | 5.11028100  | 1.83947200  |
| N                   | 7.35000000  | 1.41753200  | 0.91460000  |
| O                   | 8.09449900  | 2.34255200  | 0.57526200  |
| O                   | 7.66113700  | 0.55021800  | 1.73636800  |
| N                   | -3.94660500 | 5.78394200  | 0.24288800  |
| O                   | -4.07073100 | 6.10943000  | 1.42731700  |
| O                   | -4.79022600 | 6.01737700  | -0.62834100 |
| C                   | -1.28977400 | -1.19892000 | -3.71280900 |
| H                   | -2.28130600 | -1.04774700 | -3.26928300 |
| H                   | -0.64212100 | -0.41881600 | -3.29909700 |
| H                   | -1.36521500 | -1.07652200 | -4.79676400 |
| C                   | -2.92728600 | 1.21524200  | -0.19616500 |
| H                   | -3.69040400 | 1.99852800  | -0.20446100 |
| H                   | -2.09921100 | 1.54873000  | 0.43757700  |
| H                   | -2.51119700 | 1.09508100  | -1.19668300 |
| H                   | 0.29536400  | 0.21690200  | 1.57469900  |
| O                   | 1.49690000  | -1.77241200 | -0.43714900 |
| H                   | 1.82341000  | -1.55506500 | -1.32370300 |
| O                   | -1.75912400 | -1.13329800 | 3.36707900  |
| H                   | -2.14115200 | -0.28028400 | 3.10755600  |
| C                   | 1.55637600  | -2.65177000 | 2.48926500  |
| H                   | 1.69411700  | -2.28949900 | 1.46794000  |
| H                   | 2.17289400  | -2.03744500 | 3.15843600  |
| H                   | 1.93549600  | -3.67967200 | 2.55267100  |
| C                   | 0.00510400  | -3.10426700 | 4.40589900  |
| H                   | 0.41106600  | -4.11893200 | 4.48970400  |
| H                   | 0.60032900  | -2.45686800 | 5.05983100  |
| H                   | -1.02341900 | -3.10569700 | 4.77900800  |
| 2-TS1 <sub>SB</sub> |             |             |             |
| Zn                  | -1.43255900 | -0.78367200 | -0.23007800 |
| N                   | -1.63325500 | -2.39868000 | -1.75554600 |
| N                   | -3.08118500 | -2.09760400 | 0.55924200  |
| N                   | -3.18374500 | 0.43631900  | -0.65684700 |
| O                   | -1.37906400 | 0.23665700  | 1.73294200  |
| C                   | -1.10286000 | -2.40847900 | -2.99646200 |
| C                   | -0.90472000 | -3.61810700 | -3.67137000 |

|   |             |             |             |
|---|-------------|-------------|-------------|
| H | -0.47101400 | -3.61295400 | -4.66599000 |
| C | -1.27448900 | -4.81374900 | -3.05793200 |
| H | -1.12818700 | -5.76063500 | -3.56992300 |
| C | -1.84640200 | -4.78238800 | -1.78662900 |
| H | -2.16104700 | -5.69313300 | -1.28613700 |
| C | -2.00346800 | -3.54630100 | -1.16166400 |
| C | -2.57340000 | -3.44505700 | 0.24365900  |
| H | -3.35773400 | -4.20851700 | 0.37733300  |
| H | -1.77342700 | -3.66303300 | 0.95507800  |
| C | -4.21858900 | -1.72968400 | -0.31932400 |
| H | -5.15861800 | -2.16717900 | 0.04554600  |
| H | -4.03540800 | -2.13710900 | -1.31667000 |
| C | -4.33746000 | -0.22431200 | -0.43900100 |
| C | -5.56085200 | 0.42885200  | -0.34061600 |
| H | -6.46751500 | -0.13684600 | -0.15121000 |
| C | -5.58421700 | 1.81772800  | -0.47206700 |
| H | -6.52034900 | 2.36286400  | -0.39128800 |
| C | -4.39102600 | 2.49617300  | -0.69567200 |
| H | -4.37447900 | 3.57650400  | -0.79597700 |
| C | -3.18759000 | 1.78163500  | -0.78216600 |
| C | -3.52306900 | -1.98315100 | 1.98783600  |
| H | -3.93807000 | -2.95736200 | 2.29010700  |
| H | -4.34722200 | -1.26794800 | 1.99761000  |
| C | -2.53100600 | -1.51456100 | 3.07758600  |
| C | -2.14408700 | -0.02762300 | 2.88996600  |
| H | -1.55198600 | 0.28902400  | 3.76284800  |
| P | 1.29780000  | -0.05392400 | 0.11402000  |
| O | 0.15343600  | 0.28069200  | -0.88674100 |
| O | 2.45676400  | -1.12067200 | -0.44411500 |
| O | 2.34439900  | 1.26069500  | -0.39681300 |
| O | 1.18657600  | 0.24808100  | 1.60620600  |
| C | 3.78240600  | -1.08462400 | -0.11874200 |
| C | 4.25510800  | -0.61717200 | 1.11774200  |
| C | 4.66674300  | -1.60957800 | -1.07136400 |
| C | 5.61494700  | -0.67549500 | 1.39147600  |
| H | 3.55461700  | -0.21489600 | 1.83999400  |
| C | 6.02516100  | -1.67395600 | -0.79669100 |
| H | 4.26774900  | -1.95711500 | -2.01841000 |
| C | 6.48930400  | -1.20453900 | 0.43613300  |
| H | 6.00686300  | -0.32118100 | 2.33698200  |
| H | 6.72682000  | -2.07339100 | -1.51843100 |
| C | 1.84070800  | 2.51343400  | -0.38840300 |
| C | 1.71923400  | 3.19207500  | -1.61484400 |
| C | 1.44452500  | 3.15280600  | 0.80397300  |



|                    |             |             |             |
|--------------------|-------------|-------------|-------------|
| C                  | 1.17354700  | 4.46602100  | -1.66485900 |
| H                  | 2.03776400  | 2.68111900  | -2.51701200 |
| C                  | 0.89398800  | 4.42606400  | 0.76009700  |
| H                  | 1.55520000  | 2.61804600  | 1.73878800  |
| C                  | 0.74773300  | 5.06952100  | -0.47494400 |
| H                  | 1.05458600  | 4.99194500  | -2.60431900 |
| H                  | 0.57242500  | 4.92819400  | 1.66465200  |
| N                  | 7.91836300  | -1.27250400 | 0.73242500  |
| O                  | 8.66946900  | -1.75259900 | -0.12486900 |
| O                  | 8.30843600  | -0.84867100 | 1.82581300  |
| N                  | 0.11640900  | 6.38141700  | -0.52680600 |
| O                  | -0.28395000 | 6.88257900  | 0.53217700  |
| O                  | -0.00685200 | 6.93022700  | -1.62977800 |
| C                  | -0.75302200 | -1.07578400 | -3.59557200 |
| H                  | -1.65510400 | -0.45706600 | -3.68203600 |
| H                  | -0.06410000 | -0.53712500 | -2.93567700 |
| H                  | -0.30941300 | -1.18742500 | -4.58841100 |
| C                  | -1.87466400 | 2.47819600  | -0.98684600 |
| H                  | -2.01700800 | 3.54668000  | -1.16656800 |
| H                  | -1.23304300 | 2.34622000  | -0.11026900 |
| H                  | -1.31819600 | 2.04001500  | -1.81860500 |
| H                  | -0.37251300 | 0.24326900  | 1.90103800  |
| O                  | 0.25698200  | -1.80131500 | 0.43165300  |
| H                  | 0.60183900  | -2.45483000 | -0.19596600 |
| O                  | -3.33427400 | 0.73338400  | 2.80244000  |
| H                  | -3.08148200 | 1.63462300  | 2.54698900  |
| C                  | -1.24968000 | -2.35674200 | 3.16390700  |
| H                  | -0.62730800 | -2.26801900 | 2.26975500  |
| H                  | -0.64420000 | -2.02973600 | 4.01822900  |
| H                  | -1.50315600 | -3.41124800 | 3.33354700  |
| C                  | -3.29942600 | -1.62786300 | 4.41507900  |
| H                  | -3.52596800 | -2.67659000 | 4.64007600  |
| H                  | -2.68752900 | -1.23937600 | 5.23684300  |
| H                  | -4.23575800 | -1.06192200 | 4.39719600  |
| 2-IM <sub>SB</sub> |             |             |             |
| Zn                 | 1.65094600  | -0.79514800 | -0.05817700 |
| N                  | 2.03819900  | -2.27776700 | 1.56132500  |
| N                  | 3.31127600  | -2.08018400 | -0.86233400 |
| N                  | 3.33180900  | 0.54600400  | 0.13858900  |
| O                  | 1.35781200  | 0.00381600  | -2.08434800 |
| C                  | 1.57466600  | -2.21962600 | 2.82809100  |
| C                  | 1.47541300  | -3.38372600 | 3.59824400  |
| H                  | 1.09373400  | -3.32497100 | 4.61225700  |
| C                  | 1.87464100  | -4.60299000 | 3.05335800  |

|   |             |             |             |
|---|-------------|-------------|-------------|
| H | 1.80391200  | -5.51483100 | 3.63956300  |
| C | 2.37787900  | -4.63945900 | 1.75366800  |
| H | 2.71285000  | -5.56896600 | 1.30329500  |
| C | 2.43713700  | -3.44753000 | 1.03334900  |
| C | 2.92548400  | -3.42762600 | -0.40585800 |
| H | 3.75964000  | -4.13977300 | -0.51967600 |
| H | 2.11174300  | -3.76872000 | -1.05000300 |
| C | 4.48182000  | -1.57290100 | -0.10303800 |
| H | 5.41986700  | -1.98125800 | -0.50463700 |
| H | 4.39708400  | -1.90948500 | 0.93338900  |
| C | 4.51062600  | -0.05836300 | -0.10511100 |
| C | 5.68001100  | 0.66004700  | -0.32639600 |
| H | 6.60981400  | 0.13942500  | -0.53223700 |
| C | 5.61834200  | 2.05401200  | -0.29302500 |
| H | 6.51036000  | 2.64831300  | -0.46944100 |
| C | 4.39805900  | 2.67307900  | -0.04396300 |
| H | 4.31627100  | 3.75475600  | -0.01953100 |
| C | 3.25137600  | 1.89413400  | 0.16685600  |
| C | 3.64512000  | -2.05831000 | -2.32442200 |
| H | 4.11692400  | -3.02130800 | -2.57521000 |
| H | 4.40578000  | -1.28659600 | -2.45415700 |
| C | 2.54487600  | -1.76269900 | -3.37002800 |
| C | 2.05480100  | -0.29812900 | -3.27363800 |
| H | 1.37615600  | -0.10312200 | -4.11866500 |
| P | -1.14144100 | -0.39010800 | -0.26462300 |
| O | 0.03028100  | 0.16091400  | 0.61516900  |
| O | -2.20948400 | -1.46279400 | 0.46057700  |
| O | -2.25568400 | 0.90255900  | 0.22883100  |
| O | -1.17305300 | -0.17738300 | -1.78024600 |
| C | -3.56542200 | -1.45215600 | 0.29919800  |
| C | -4.17976300 | -1.12108600 | -0.91892800 |
| C | -4.33000100 | -1.86650800 | 1.39763000  |
| C | -5.56087100 | -1.20294500 | -1.02873900 |
| H | -3.56766100 | -0.79759500 | -1.75293100 |
| C | -5.71075800 | -1.95512400 | 1.28818900  |
| H | -3.82296800 | -2.10997100 | 2.32527600  |
| C | -6.31592500 | -1.62101400 | 0.07285600  |
| H | -6.06146600 | -0.95145500 | -1.95569700 |
| H | -6.32258600 | -2.27030200 | 2.12429700  |
| C | -1.84570800 | 2.17821800  | 0.10731500  |
| C | -1.71240300 | 2.95256900  | 1.27610200  |
| C | -1.55375000 | 2.75839100  | -1.14564700 |
| C | -1.25235900 | 4.25848700  | 1.21012000  |
| H | -1.95110600 | 2.48833600  | 2.22697300  |

|                     |             |             |             |
|---------------------|-------------|-------------|-------------|
| C                   | -1.09012400 | 4.06390700  | -1.21800100 |
| H                   | -1.67415900 | 2.15165300  | -2.03415300 |
| C                   | -0.92557600 | 4.80250400  | -0.03909100 |
| H                   | -1.12246500 | 4.85628300  | 2.10411900  |
| H                   | -0.84863900 | 4.51999200  | -2.17065200 |
| N                   | -7.76894200 | -1.71454000 | -0.04849800 |
| O                   | -8.41351300 | -2.09172300 | 0.93740700  |
| O                   | -8.28493200 | -1.41377100 | -1.13050000 |
| N                   | -0.37664700 | 6.14802100  | -0.10944100 |
| O                   | -0.05359300 | 6.59421000  | -1.21911600 |
| O                   | -0.23871400 | 6.78294600  | 0.94520400  |
| C                   | 1.18640100  | -0.86530400 | 3.34956200  |
| H                   | 2.05375900  | -0.19364000 | 3.32698100  |
| H                   | 0.42481800  | -0.41837400 | 2.70075400  |
| H                   | 0.81650300  | -0.92361900 | 4.37655300  |
| C                   | 1.90652600  | 2.51565400  | 0.40169500  |
| H                   | 1.97965200  | 3.60312000  | 0.47881000  |
| H                   | 1.22128400  | 2.26096800  | -0.41281100 |
| H                   | 1.43781500  | 2.11842200  | 1.30543200  |
| H                   | 0.33831300  | -0.07434000 | -2.17331800 |
| O                   | -0.05672900 | -2.00302200 | -0.49133000 |
| H                   | -0.30303400 | -2.63024900 | 0.20570700  |
| O                   | 3.18364300  | 0.55303800  | -3.34472100 |
| H                   | 2.87883100  | 1.45440200  | -3.15512400 |
| C                   | 1.32961200  | -2.69858000 | -3.28575300 |
| H                   | 0.76602700  | -2.57248500 | -2.35822100 |
| H                   | 0.64139600  | -2.49214300 | -4.11444000 |
| H                   | 1.64983600  | -3.74382600 | -3.38455000 |
| C                   | 3.22216400  | -1.93798400 | -4.74896200 |
| H                   | 3.51606600  | -2.98281600 | -4.90285000 |
| H                   | 2.52383200  | -1.67022500 | -5.54972500 |
| H                   | 4.10811600  | -1.30413100 | -4.85063200 |
| 2-TS <sub>2SB</sub> |             |             |             |
| Zn                  | 1.77243100  | -0.69412700 | 0.08135700  |
| N                   | 2.17048900  | -2.30901400 | 1.50900100  |
| N                   | 3.40627700  | -1.88870200 | -0.88536800 |
| N                   | 3.32355500  | 0.64565300  | 0.33308300  |
| O                   | 1.20697300  | 0.03721600  | -1.83611600 |
| C                   | 1.67791000  | -2.35290800 | 2.76733600  |
| C                   | 1.56354200  | -3.57550800 | 3.43515200  |
| H                   | 1.16058200  | -3.60025000 | 4.44215900  |
| C                   | 1.97433900  | -4.74739100 | 2.79922600  |
| H                   | 1.88681300  | -5.70455800 | 3.30523000  |
| C                   | 2.51086000  | -4.67712800 | 1.51522400  |

|   |             |             |             |
|---|-------------|-------------|-------------|
| H | 2.85539100  | -5.56650300 | 0.99647300  |
| C | 2.58773200  | -3.42891000 | 0.89886100  |
| C | 3.11923500  | -3.28858300 | -0.51636700 |
| H | 4.01465000  | -3.91951800 | -0.63951700 |
| H | 2.35917200  | -3.66528200 | -1.20312400 |
| C | 4.57915400  | -1.37027100 | -0.12817000 |
| H | 5.52003000  | -1.69283800 | -0.59427000 |
| H | 4.55141000  | -1.79238900 | 0.88036200  |
| C | 4.52516400  | 0.13971600  | -0.00880400 |
| C | 5.62675600  | 0.96014400  | -0.21261200 |
| H | 6.58185500  | 0.53198100  | -0.49898200 |
| C | 5.46429900  | 2.34033200  | -0.06036500 |
| H | 6.30243900  | 3.01062500  | -0.22748800 |
| C | 4.21953400  | 2.85102600  | 0.29508300  |
| H | 4.06217400  | 3.91812800  | 0.41135300  |
| C | 3.14511500  | 1.97399000  | 0.48947800  |
| C | 3.68385100  | -1.74551700 | -2.35286000 |
| H | 4.20344800  | -2.65572400 | -2.68938100 |
| H | 4.38815600  | -0.91794200 | -2.45479300 |
| C | 2.51404500  | -1.45474700 | -3.31857700 |
| C | 1.91413000  | -0.05406000 | -3.06058400 |
| H | 1.20105800  | 0.17843700  | -3.86578700 |
| P | -1.13172000 | -1.15742900 | -0.19747600 |
| O | -0.05268600 | -0.45625400 | 0.69614400  |
| O | -2.40975800 | -1.81434600 | 0.62334400  |
| O | -2.27592100 | 0.60176300  | 0.21823300  |
| O | -1.18161600 | -0.88283900 | -1.69462800 |
| C | -3.74004900 | -1.54008700 | 0.45004400  |
| C | -4.29456000 | -1.29347600 | -0.81363400 |
| C | -4.54558800 | -1.61158900 | 1.59105200  |
| C | -5.66564300 | -1.11478500 | -0.92832500 |
| H | -3.64288800 | -1.22250300 | -1.67640500 |
| C | -5.91835700 | -1.43807200 | 1.47847400  |
| H | -4.07817200 | -1.79516900 | 2.55235400  |
| C | -6.46709200 | -1.19144100 | 0.21668800  |
| H | -6.12359500 | -0.91730100 | -1.88962600 |
| H | -6.56469600 | -1.48505800 | 2.34598200  |
| C | -1.82101400 | 1.77613500  | -0.08750100 |
| C | -1.73327600 | 2.79098000  | 0.91680200  |
| C | -1.38312300 | 2.12879400  | -1.40565400 |
| C | -1.15068200 | 4.01475200  | 0.66035200  |
| H | -2.11060500 | 2.54800600  | 1.90542600  |
| C | -0.79351100 | 3.35048600  | -1.66166400 |
| H | -1.51486200 | 1.39845000  | -2.19329900 |

|                    |             |             |             |
|--------------------|-------------|-------------|-------------|
| C                  | -0.63954000 | 4.28911100  | -0.62365400 |
| H                  | -1.04615700 | 4.76092200  | 1.43962900  |
| H                  | -0.43753500 | 3.60189300  | -2.65461500 |
| N                  | -7.91205300 | -1.01351400 | 0.09178700  |
| O                  | -8.59945200 | -1.08152900 | 1.11782600  |
| O                  | -8.37965500 | -0.80551200 | -1.03328000 |
| N                  | 0.12184900  | 5.48103600  | -0.84965300 |
| O                  | 0.60928600  | 5.67801200  | -1.98075500 |
| O                  | 0.30661600  | 6.26465100  | 0.10235800  |
| C                  | 1.26605000  | -1.04900100 | 3.38952700  |
| H                  | 2.08445500  | -0.32232100 | 3.31815200  |
| H                  | 0.41501700  | -0.63462300 | 2.83755100  |
| H                  | 0.99949000  | -1.17501900 | 4.44189100  |
| C                  | 1.76380400  | 2.43175300  | 0.84173900  |
| H                  | 1.72206400  | 3.50866900  | 1.01269600  |
| H                  | 1.06502600  | 2.18243100  | 0.03589300  |
| H                  | 1.39630100  | 1.91224400  | 1.73292200  |
| H                  | 0.22558200  | -0.24235800 | -1.93726200 |
| O                  | -0.37080600 | -2.70026400 | -0.27408000 |
| H                  | -0.47734700 | -3.17446800 | 0.56565800  |
| O                  | 2.95722300  | 0.89153600  | -3.03025400 |
| H                  | 2.56557700  | 1.76676800  | -2.87761700 |
| C                  | 1.38575400  | -2.49645900 | -3.25648200 |
| H                  | 0.88200000  | -2.53112300 | -2.28863400 |
| H                  | 0.61368800  | -2.26334200 | -3.99842000 |
| H                  | 1.77866000  | -3.49299200 | -3.49351400 |
| C                  | 3.12417900  | -1.45163100 | -4.73797500 |
| H                  | 3.51348500  | -2.44395700 | -4.99327200 |
| H                  | 2.35808400  | -1.19748300 | -5.47880900 |
| H                  | 3.93502600  | -0.72235100 | -4.82810100 |
| 2-PC <sub>SB</sub> |             |             |             |
| Zn                 | 1.73549800  | -0.44174800 | 0.36297200  |
| N                  | 2.18820000  | -2.24208900 | 1.54584700  |
| N                  | 3.33773900  | -1.49585200 | -0.81586400 |
| N                  | 3.23404700  | 0.88333800  | 0.73456400  |
| O                  | 0.96978100  | 0.38354500  | -1.36967700 |
| C                  | 1.74228200  | -2.45711600 | 2.80678300  |
| C                  | 1.64770100  | -3.75840900 | 3.30584800  |
| H                  | 1.28253500  | -3.92048400 | 4.31472600  |
| C                  | 2.04279400  | -4.83382100 | 2.50691900  |
| H                  | 1.97015600  | -5.85041600 | 2.88242000  |
| C                  | 2.55269800  | -4.58781000 | 1.23566700  |
| H                  | 2.89551600  | -5.39590200 | 0.59674300  |
| C                  | 2.60745400  | -3.26694300 | 0.78846800  |

|   |             |             |             |
|---|-------------|-------------|-------------|
| C | 3.13753300  | -2.93945000 | -0.59649700 |
| H | 4.07291300  | -3.49691100 | -0.76945800 |
| H | 2.41826000  | -3.29677200 | -1.33632700 |
| C | 4.52397700  | -1.00145800 | -0.05926100 |
| H | 5.45315200  | -1.23662000 | -0.59519100 |
| H | 4.55426200  | -1.52368600 | 0.90163000  |
| C | 4.41333100  | 0.48589200  | 0.20915200  |
| C | 5.43005200  | 1.39123800  | -0.04845700 |
| H | 6.36628200  | 1.05359400  | -0.48083200 |
| C | 5.19949200  | 2.74460300  | 0.22411400  |
| H | 5.96093000  | 3.48412100  | -0.00492800 |
| C | 3.98472000  | 3.14140400  | 0.77114600  |
| H | 3.76127200  | 4.18449500  | 0.95789900  |
| C | 3.00467200  | 2.17742300  | 1.03709000  |
| C | 3.52119700  | -1.18387600 | -2.27233000 |
| H | 4.03336500  | -2.03721700 | -2.74214300 |
| H | 4.19598000  | -0.32878400 | -2.32523400 |
| C | 2.27649500  | -0.81433200 | -3.10541300 |
| C | 1.68367700  | 0.53181300  | -2.62118100 |
| H | 0.94047000  | 0.89183300  | -3.34568300 |
| P | -1.23080600 | -1.17307100 | 0.29401300  |
| O | -0.10584700 | -0.48343300 | 1.08704800  |
| O | -2.56216300 | -0.86202000 | 1.16823200  |
| O | -3.78120000 | 2.86660800  | 1.54849600  |
| O | -1.36450500 | -0.87938700 | -1.17017900 |
| C | -3.85587600 | -1.08157200 | 0.70404700  |
| C | -4.22430200 | -2.29928400 | 0.12140000  |
| C | -4.76990200 | -0.04440800 | 0.89437400  |
| C | -5.54338000 | -2.48565800 | -0.27670900 |
| H | -3.48889300 | -3.08316500 | -0.02040600 |
| C | -6.09046400 | -0.23496100 | 0.49808700  |
| H | -4.43946000 | 0.90710900  | 1.31044500  |
| C | -6.46249700 | -1.45235200 | -0.07883300 |
| H | -5.86550700 | -3.41373600 | -0.73207900 |
| H | -6.82308800 | 0.55276600  | 0.62413000  |
| C | -2.76151200 | 3.18037500  | 0.88513900  |
| C | -1.86377300 | 4.24702900  | 1.31384300  |
| C | -2.39675200 | 2.50870700  | -0.35765800 |
| C | -0.73152500 | 4.56378600  | 0.62063700  |
| H | -2.14060300 | 4.78510600  | 2.21559000  |
| C | -1.27030800 | 2.84117400  | -1.05629700 |
| H | -3.05297900 | 1.72083000  | -0.71375700 |
| C | -0.39303700 | 3.85461500  | -0.57007800 |
| H | -0.06917000 | 5.35517300  | 0.95487100  |

|   |             |             |             |
|---|-------------|-------------|-------------|
| H | -1.00901600 | 2.32638300  | -1.97271000 |
| N | -7.85576000 | -1.65659100 | -0.49252700 |
| O | -8.65953200 | -0.74127900 | -0.29890400 |
| O | -8.15396100 | -2.73714200 | -1.01316600 |
| N | 0.82778600  | 4.07931700  | -1.18434600 |
| O | 1.07089900  | 3.53048600  | -2.31472100 |
| O | 1.70878900  | 4.78633200  | -0.62415000 |
| C | 1.37733200  | -1.25133400 | 3.62709700  |
| H | 2.18477200  | -0.51114300 | 3.58279300  |
| H | 0.48097000  | -0.77532500 | 3.21741100  |
| H | 1.20346400  | -1.51973000 | 4.67211000  |
| C | 1.68084100  | 2.50183300  | 1.65989400  |
| H | 1.55337400  | 3.57656900  | 1.78130400  |
| H | 0.85509600  | 2.13661800  | 1.04074400  |
| H | 1.59409300  | 2.01305900  | 2.63834600  |
| H | 0.02881400  | 0.07511100  | -1.49794600 |
| O | -0.99979100 | -2.79635400 | 0.44989300  |
| H | -0.81613200 | -3.03541000 | 1.37389400  |
| O | 2.69866500  | 1.44731800  | -2.42620700 |
| H | 2.27431500  | 2.34661400  | -2.35205800 |
| C | 1.18754400  | -1.89809500 | -3.10151200 |
| H | 0.77672600  | -2.08906000 | -2.10699600 |
| H | 0.34078700  | -1.59132900 | -3.72545100 |
| H | 1.57862500  | -2.83678600 | -3.51300800 |
| C | 2.77541100  | -0.60337900 | -4.55159400 |
| H | 3.20099800  | -1.52925100 | -4.95633900 |
| H | 1.94324200  | -0.30960600 | -5.20049200 |
| H | 3.53355600  | 0.18397300  | -4.59819600 |

### 3-AC<sub>SB</sub>

|    |             |             |             |
|----|-------------|-------------|-------------|
| Zn | -1.04108600 | -1.10063300 | 0.01603700  |
| N  | -1.06029400 | -0.48313500 | -2.49203800 |
| N  | -3.12764100 | -1.28622600 | -0.84486800 |
| N  | -2.22149300 | 0.87087400  | 0.70284400  |
| C  | -0.05236500 | 0.01648000  | -3.23372800 |
| C  | 0.25015500  | -0.51098300 | -4.49337500 |
| H  | 1.07240000  | -0.09833100 | -5.07027300 |
| C  | -0.51269900 | -1.56910300 | -4.98904600 |
| H  | -0.28424500 | -2.00888000 | -5.95563700 |
| C  | -1.57020700 | -2.05846300 | -4.22699900 |
| H  | -2.18550600 | -2.88022600 | -4.58136000 |
| C  | -1.81030600 | -1.48256000 | -2.97624400 |
| C  | -2.94075300 | -2.01791600 | -2.11278200 |
| H  | -3.87927500 | -2.01100100 | -2.69525000 |

|   |             |             |             |
|---|-------------|-------------|-------------|
| H | -2.69653600 | -3.04888000 | -1.87135000 |
| C | -3.62968600 | 0.07720900  | -1.11659300 |
| H | -4.70084600 | 0.05515100  | -1.37226600 |
| H | -3.09038400 | 0.46944100  | -1.98053500 |
| C | -3.38741100 | 1.01175200  | 0.04570300  |
| C | -4.32758200 | 1.98854400  | 0.37202000  |
| H | -5.25847400 | 2.05277700  | -0.18308600 |
| C | -4.04368500 | 2.86410300  | 1.41703400  |
| H | -4.75166700 | 3.63798800  | 1.70023400  |
| C | -2.84110200 | 2.71937800  | 2.09936100  |
| H | -2.58890500 | 3.37569500  | 2.92582000  |
| C | -1.94368700 | 1.70835300  | 1.72698400  |
| C | -4.09930500 | -1.96249300 | 0.05793500  |
| H | -4.94904600 | -2.31138700 | -0.55236900 |
| H | -4.48784700 | -1.18435700 | 0.72180400  |
| C | -3.67049900 | -3.14140100 | 0.97198000  |
| C | -4.97316400 | -3.59178700 | 1.68017400  |
| H | -5.70481200 | -3.94889200 | 0.94746500  |
| H | -5.43117600 | -2.77607700 | 2.25332400  |
| H | -4.76700100 | -4.41625200 | 2.37089900  |
| C | -3.07006000 | -4.35003600 | 0.21493600  |
| H | -2.09744600 | -4.09359100 | -0.21892400 |
| H | -3.76603400 | -4.68686100 | -0.56472600 |
| H | -2.92529200 | -5.18648100 | 0.90892800  |
| C | -2.68560600 | -2.76007800 | 2.06168300  |
| H | -2.80832400 | -3.22964800 | 3.04071800  |
| N | -1.67002000 | -2.00611200 | 1.89726200  |
| O | 1.63181700  | -6.48022500 | -3.14202000 |
| N | 1.72835000  | -5.31896600 | -3.54515400 |
| C | 2.13174000  | -4.28528700 | -2.58707600 |
| O | 1.49352400  | -4.97006900 | -4.70802700 |
| C | 2.27703100  | -4.62062000 | -1.23813800 |
| C | 2.32008900  | -2.98053500 | -3.04963000 |
| C | 2.59710500  | -3.62205700 | -0.32507700 |
| H | 2.10611800  | -5.63966500 | -0.91530100 |
| C | 2.64638500  | -1.98812900 | -2.13373600 |
| H | 2.18445200  | -2.75450700 | -4.09858500 |
| C | 2.76800400  | -2.31143900 | -0.77895900 |
| H | 2.66664200  | -3.82811400 | 0.73657200  |
| H | 2.77335900  | -0.95841700 | -2.44718100 |
| O | 3.07285200  | -1.29378200 | 0.10359700  |
| P | 1.91761900  | -0.72387000 | 1.14290900  |
| O | 0.76776300  | -0.14789400 | 0.32360900  |
| O | 1.63190300  | -1.68938400 | 2.25029200  |



|                     |             |             |             |
|---------------------|-------------|-------------|-------------|
| O                   | 2.78288300  | 0.53046400  | 1.76492400  |
| C                   | 2.95056000  | 1.74187900  | 1.14326600  |
| C                   | 3.28260200  | 1.85806000  | -0.21287300 |
| C                   | 2.80027700  | 2.88120400  | 1.94373200  |
| C                   | 3.43071000  | 3.11981700  | -0.77563900 |
| H                   | 3.42009800  | 0.96542000  | -0.80883300 |
| C                   | 2.95573000  | 4.14425100  | 1.38732800  |
| H                   | 2.55638200  | 2.75287700  | 2.99258200  |
| C                   | 3.25917000  | 4.25029900  | 0.02692000  |
| H                   | 3.67817700  | 3.23865300  | -1.82328100 |
| H                   | 2.83778700  | 5.04027500  | 1.98400700  |
| N                   | 3.39751700  | 5.57986500  | -0.57351000 |
| O                   | 3.24867500  | 6.56401900  | 0.15686700  |
| O                   | 3.65053400  | 5.64750800  | -1.78026000 |
| O                   | -0.91454500 | -1.86440600 | 3.05885200  |
| C                   | -0.64505200 | 1.53745100  | 2.46025500  |
| H                   | -0.53472900 | 0.50829100  | 2.81005400  |
| H                   | 0.19143700  | 1.75126000  | 1.79172400  |
| H                   | -0.59259400 | 2.20935900  | 3.32162100  |
| C                   | 0.70911100  | 1.16887300  | -2.63706700 |
| H                   | 0.09237500  | 2.07671400  | -2.64610100 |
| H                   | 0.95379600  | 0.95277600  | -1.59437500 |
| H                   | 1.62486400  | 1.38119800  | -3.19837700 |
| O                   | -0.50564100 | -2.81962200 | -0.66479100 |
| H                   | 0.13947100  | -2.74766600 | -1.38033900 |
| H                   | 0.03758000  | -1.80716200 | 2.75204300  |
| 3-TS1 <sub>SB</sub> |             |             |             |
| Zn                  | 1.49895000  | -0.65934500 | -0.40696400 |
| N                   | 1.64094600  | -2.09881100 | 1.47174500  |
| N                   | 3.26504300  | -1.97708700 | -0.71460700 |
| N                   | 3.15547100  | 0.73034900  | -0.05269900 |
| C                   | 0.88618400  | -2.01967700 | 2.58609800  |
| C                   | 0.43457000  | -3.18191900 | 3.22433400  |
| H                   | -0.17787400 | -3.09761500 | 4.11673900  |
| C                   | 0.78173900  | -4.42829700 | 2.71150400  |
| H                   | 0.43401600  | -5.33791900 | 3.19302300  |
| C                   | 1.59362000  | -4.49507300 | 1.58030700  |
| H                   | 1.89998500  | -5.44848200 | 1.15931800  |
| C                   | 1.99474300  | -3.29926500 | 0.98998900  |
| C                   | 2.85557300  | -3.32277600 | -0.26522300 |
| H                   | 3.74271100  | -3.95677800 | -0.09681300 |
| H                   | 2.27788900  | -3.78843000 | -1.06105900 |
| C                   | 4.26323600  | -1.41118300 | 0.23071800  |
| H                   | 5.25618900  | -1.84882400 | 0.04931800  |

|   |             |             |             |
|---|-------------|-------------|-------------|
| H | 3.95854400  | -1.68476300 | 1.24267200  |
| C | 4.32636400  | 0.09962300  | 0.15230600  |
| C | 5.52294200  | 0.78775100  | 0.32815200  |
| H | 6.44998700  | 0.24386800  | 0.48150200  |
| C | 5.49306400  | 2.18285400  | 0.30271800  |
| H | 6.40603100  | 2.75522300  | 0.44078800  |
| C | 4.28229300  | 2.83073900  | 0.08389900  |
| H | 4.22877000  | 3.91363800  | 0.04581300  |
| C | 3.11151000  | 2.08136400  | -0.10436500 |
| C | 3.87525000  | -1.97479200 | -2.07358900 |
| H | 4.58032700  | -2.82010400 | -2.13459400 |
| H | 4.47218900  | -1.06016800 | -2.13054700 |
| C | 2.99990100  | -2.00106600 | -3.35330800 |
| C | 2.11965000  | -0.78050100 | -3.54486700 |
| H | 1.92181200  | -0.44973900 | -4.56766800 |
| P | -1.27485900 | -0.06374300 | -0.27060000 |
| O | 0.03115600  | 0.37569900  | 0.44090200  |
| O | -2.20171800 | -1.18733300 | 0.53434300  |
| O | -2.26660500 | 1.19174300  | 0.47580000  |
| O | -1.54963700 | 0.22268500  | -1.74798900 |
| C | -3.56132900 | -1.23925200 | 0.54940600  |
| C | -4.36847300 | -0.74519800 | -0.48907100 |
| C | -4.13697300 | -1.89040600 | 1.65102100  |
| C | -5.74565200 | -0.90183200 | -0.41454200 |
| H | -3.90828500 | -0.24435400 | -1.33246500 |
| C | -5.51244900 | -2.05057600 | 1.72490300  |
| H | -3.48395300 | -2.26298600 | 2.43313200  |
| C | -6.30915200 | -1.55308600 | 0.68820700  |
| H | -6.38992500 | -0.52865100 | -1.20119900 |
| H | -5.97670100 | -2.54792900 | 2.56748300  |
| C | -1.85658100 | 2.47320700  | 0.40060100  |
| C | -1.55835400 | 3.14713000  | 1.60031500  |
| C | -1.72657100 | 3.15172700  | -0.82855000 |
| C | -1.09811100 | 4.45488900  | 1.58002700  |
| H | -1.67470500 | 2.60702000  | 2.53382800  |
| C | -1.26069300 | 4.45858900  | -0.85601700 |
| H | -1.97446100 | 2.62468300  | -1.74170600 |
| C | -0.93596200 | 5.09840700  | 0.34660300  |
| H | -0.84582100 | 4.97825500  | 2.49425200  |
| H | -1.13916300 | 4.98861500  | -1.79295400 |
| N | -7.75722500 | -1.72199700 | 0.75808400  |
| O | -8.23055800 | -2.30255700 | 1.74290600  |
| O | -8.44283400 | -1.27884400 | -0.17027600 |
| N | -0.39481400 | 6.45007900  | 0.31389400  |

|                    |             |             |             |
|--------------------|-------------|-------------|-------------|
| O                  | -0.21108200 | 6.98211400  | -0.78889800 |
| O                  | -0.12742600 | 7.00231000  | 1.38955800  |
| C                  | 0.55285900  | -0.65775200 | 3.13022200  |
| H                  | 1.24810700  | 0.09243700  | 2.75023700  |
| H                  | -0.44618500 | -0.35174100 | 2.80517500  |
| H                  | 0.57787300  | -0.66766800 | 4.22552700  |
| C                  | 1.79311900  | 2.73668600  | -0.38570700 |
| H                  | 1.88633400  | 3.82521700  | -0.39721700 |
| H                  | 1.40656300  | 2.40307700  | -1.35462800 |
| H                  | 1.04568000  | 2.44075900  | 0.35483600  |
| O                  | -0.20957100 | -1.72749800 | -0.79063900 |
| H                  | -0.48162600 | -1.88312000 | -1.70756400 |
| C                  | 2.07047800  | -3.23425100 | -3.46176000 |
| H                  | 1.27897200  | -3.20840100 | -2.70820700 |
| H                  | 1.58726300  | -3.25545000 | -4.44482300 |
| H                  | 2.64575500  | -4.16214000 | -3.35446000 |
| C                  | 4.00428000  | -2.04112300 | -4.53164000 |
| H                  | 4.61205400  | -2.95171300 | -4.49303700 |
| H                  | 3.47292900  | -2.03671500 | -5.48907500 |
| H                  | 4.67874400  | -1.17700800 | -4.51651100 |
| N                  | 1.49508200  | -0.20343800 | -2.59510700 |
| O                  | 0.66337600  | 0.82475000  | -3.02403700 |
| H                  | -0.20109100 | 0.67151400  | -2.50489200 |
| 3-IM <sub>SB</sub> |             |             |             |
| Zn                 | 1.60588400  | -0.65868800 | -0.36366800 |
| N                  | 1.78254800  | -2.08878300 | 1.51625000  |
| N                  | 3.38818900  | -1.95208900 | -0.68015300 |
| N                  | 3.23399200  | 0.76134500  | -0.04500000 |
| C                  | 1.02717200  | -2.01422800 | 2.63083100  |
| C                  | 0.58946800  | -3.17962800 | 3.27290400  |
| H                  | -0.02406200 | -3.09941600 | 4.16490800  |
| C                  | 0.95063400  | -4.42368800 | 2.76412800  |
| H                  | 0.61250300  | -5.33554800 | 3.24819000  |
| C                  | 1.76397200  | -4.48509400 | 1.63360500  |
| H                  | 2.08154600  | -5.43635100 | 1.21603300  |
| C                  | 2.15173400  | -3.28667500 | 1.03986500  |
| C                  | 3.01803500  | -3.30316500 | -0.21171800 |
| H                  | 3.92413600  | -3.90569200 | -0.02949700 |
| H                  | 2.46150500  | -3.80067800 | -1.00338000 |
| C                  | 4.38446800  | -1.35493900 | 0.24913100  |
| H                  | 5.38329400  | -1.77712600 | 0.06393200  |
| H                  | 4.09284100  | -1.62174600 | 1.26685900  |
| C                  | 4.41925700  | 0.15567100  | 0.15244000  |
| C                  | 5.60365600  | 0.86907800  | 0.30736200  |

|   |             |             |             |
|---|-------------|-------------|-------------|
| H | 6.54325000  | 0.34572900  | 0.45552800  |
| C | 5.54488800  | 2.26319100  | 0.26888900  |
| H | 6.44763500  | 2.85508800  | 0.39080300  |
| C | 4.31888400  | 2.88476300  | 0.05889800  |
| H | 4.24311400  | 3.96597700  | 0.01207900  |
| C | 3.16104900  | 2.11056700  | -0.10851000 |
| C | 3.98369600  | -1.95315000 | -2.04583200 |
| H | 4.70241600  | -2.78677700 | -2.10636300 |
| H | 4.56407900  | -1.02916000 | -2.11968500 |
| C | 3.09115400  | -2.00803400 | -3.31267600 |
| C | 2.19033300  | -0.80229400 | -3.50336200 |
| H | 1.98674800  | -0.47208100 | -4.52512200 |
| P | -1.17720600 | -0.15836900 | -0.22088100 |
| O | 0.12134300  | 0.33444600  | 0.48063000  |
| O | -2.10762500 | -1.28129500 | 0.59085100  |
| O | -2.18312000 | 1.09400000  | 0.54503600  |
| O | -1.48346700 | 0.14185500  | -1.69241100 |
| C | -3.46638600 | -1.27785700 | 0.67493000  |
| C | -4.29892900 | -0.80733000 | -0.35436900 |
| C | -4.01640500 | -1.85331000 | 1.82958400  |
| C | -5.67595300 | -0.91170700 | -0.21853100 |
| H | -3.85529500 | -0.36090400 | -1.23667400 |
| C | -5.39264800 | -1.96227900 | 1.96555400  |
| H | -3.34431400 | -2.20887900 | 2.60342900  |
| C | -6.21420700 | -1.48894000 | 0.93732900  |
| H | -6.33996600 | -0.55489100 | -0.99628800 |
| H | -5.83805600 | -2.40125700 | 2.84972100  |
| C | -1.79750400 | 2.37926900  | 0.46412500  |
| C | -1.49345300 | 3.06088200  | 1.65921700  |
| C | -1.69707500 | 3.06126900  | -0.76696500 |
| C | -1.05577700 | 4.37586700  | 1.63187500  |
| H | -1.58696800 | 2.51958900  | 2.59467100  |
| C | -1.25389800 | 4.37545600  | -0.80151900 |
| H | -1.94946400 | 2.52939400  | -1.67604900 |
| C | -0.92174200 | 5.02187400  | 0.39600300  |
| H | -0.79885400 | 4.90388800  | 2.54216500  |
| H | -1.15523500 | 4.90709000  | -1.74027900 |
| N | -7.66303900 | -1.60476000 | 1.07222700  |
| O | -8.11445200 | -2.11917900 | 2.10303300  |
| O | -8.37130400 | -1.18526000 | 0.14988900  |
| N | -0.40156600 | 6.38025700  | 0.35496600  |
| O | -0.23738400 | 6.91335800  | -0.75089000 |
| O | -0.12979500 | 6.93909300  | 1.42658700  |
| C | 0.67912600  | -0.65470600 | 3.17152800  |

|                     |             |             |             |
|---------------------|-------------|-------------|-------------|
| H                   | 1.36052600  | 0.10348600  | 2.78257200  |
| H                   | -0.32661000 | -0.36367300 | 2.85360800  |
| H                   | 0.71364600  | -0.65993500 | 4.26664900  |
| C                   | 1.82591800  | 2.73515900  | -0.37959300 |
| H                   | 1.89488900  | 3.82530400  | -0.39805000 |
| H                   | 1.43644200  | 2.38748000  | -1.34246900 |
| H                   | 1.09204200  | 2.42728500  | 0.36978200  |
| O                   | -0.12531100 | -1.75337300 | -0.71415800 |
| H                   | -0.41540100 | -1.95717100 | -1.61618900 |
| C                   | 2.17812800  | -3.25557700 | -3.39290900 |
| H                   | 1.39965300  | -3.23366300 | -2.62558700 |
| H                   | 1.67730900  | -3.29244600 | -4.36663800 |
| H                   | 2.76784900  | -4.17460900 | -3.28779900 |
| C                   | 4.07862200  | -2.04704900 | -4.50490700 |
| H                   | 4.70085600  | -2.94773200 | -4.46466500 |
| H                   | 3.53345500  | -2.06188800 | -5.45442400 |
| H                   | 4.73983400  | -1.17264400 | -4.50966900 |
| N                   | 1.55422100  | -0.23972200 | -2.55229900 |
| O                   | 0.70433000  | 0.77331700  | -2.97654000 |
| H                   | -0.15801700 | 0.60625100  | -2.45185500 |
| 3-TS <sub>2SB</sub> |             |             |             |
| Zn                  | 1.74725500  | -0.66558300 | -0.45531200 |
| N                   | 1.87175900  | -2.04420400 | 1.31562400  |
| N                   | 3.50020700  | -1.97929500 | -0.84472800 |
| N                   | 3.26401600  | 0.72231300  | -0.14231100 |
| C                   | 1.15048600  | -1.90132300 | 2.44996200  |
| C                   | 0.85834800  | -3.01917200 | 3.24062600  |
| H                   | 0.27478700  | -2.89168700 | 4.14664300  |
| C                   | 1.32218000  | -4.27605200 | 2.86088400  |
| H                   | 1.09548800  | -5.15021000 | 3.46448500  |
| C                   | 2.09631900  | -4.39788600 | 1.70767400  |
| H                   | 2.49420100  | -5.35757100 | 1.39113200  |
| C                   | 2.34368500  | -3.24926900 | 0.96129400  |
| C                   | 3.15923500  | -3.31816300 | -0.32073000 |
| H                   | 4.07295100  | -3.91161100 | -0.15285200 |
| H                   | 2.57231900  | -3.84183400 | -1.07303200 |
| C                   | 4.52768100  | -1.34336800 | 0.02704200  |
| H                   | 5.53021900  | -1.71919900 | -0.22214500 |
| H                   | 4.31666400  | -1.63367700 | 1.05950100  |
| C                   | 4.48972100  | 0.16951800  | -0.04783600 |
| C                   | 5.63784800  | 0.94726800  | 0.03462800  |
| H                   | 6.61417600  | 0.47771700  | 0.10107100  |
| C                   | 5.49770900  | 2.33841200  | 0.03374100  |
| H                   | 6.37439800  | 2.97609900  | 0.10172800  |

|   |             |             |             |
|---|-------------|-------------|-------------|
| C | 4.22917700  | 2.89911700  | -0.06588200 |
| H | 4.08991200  | 3.97480000  | -0.07797400 |
| C | 3.10654600  | 2.06509800  | -0.16599500 |
| C | 4.02064600  | -2.01111100 | -2.23871200 |
| H | 4.73968600  | -2.84208100 | -2.32260100 |
| H | 4.58958500  | -1.08555400 | -2.36831300 |
| C | 3.04405800  | -2.10149300 | -3.43945100 |
| C | 2.12391800  | -0.90437600 | -3.57769400 |
| H | 1.88919900  | -0.54440700 | -4.58187900 |
| P | -1.22873600 | -0.89511600 | -0.71131400 |
| O | -0.04631000 | -0.27877600 | 0.07748300  |
| O | -2.36159800 | -1.80729600 | 0.07656900  |
| O | -2.33115600 | 0.64616000  | 0.46648000  |
| O | -1.62999100 | -0.29628500 | -2.04730000 |
| C | -3.69460700 | -1.52936800 | 0.24320900  |
| C | -4.47392900 | -0.92768400 | -0.75470200 |
| C | -4.27072700 | -1.97850900 | 1.43588300  |
| C | -5.83728600 | -0.77377300 | -0.54748400 |
| H | -3.99631100 | -0.56619600 | -1.65722000 |
| C | -5.63491100 | -1.82939400 | 1.64449600  |
| H | -3.63287500 | -2.43432700 | 2.18543100  |
| C | -6.40796000 | -1.22735400 | 0.64754100  |
| H | -6.46460300 | -0.30525700 | -1.29567400 |
| H | -6.10523500 | -2.16515600 | 2.56026700  |
| C | -1.92221000 | 1.87118400  | 0.45824900  |
| C | -1.60615600 | 2.53552800  | 1.68733900  |
| C | -1.74593300 | 2.62045400  | -0.75073700 |
| C | -1.09299500 | 3.81546500  | 1.70776900  |
| H | -1.76839600 | 1.98442300  | 2.60915700  |
| C | -1.22771400 | 3.89806800  | -0.73151700 |
| H | -2.01428300 | 2.13836300  | -1.68375300 |
| C | -0.87583800 | 4.49826400  | 0.49480700  |
| H | -0.82714500 | 4.30101700  | 2.63983600  |
| H | -1.07002000 | 4.45079500  | -1.65068900 |
| N | -7.84562300 | -1.07437400 | 0.85747600  |
| O | -8.32686600 | -1.47963900 | 1.92278500  |
| O | -8.51438000 | -0.54974300 | -0.03982600 |
| N | -0.21122500 | 5.76547600  | 0.50386800  |
| O | 0.11796500  | 6.27685600  | -0.58665300 |
| O | 0.05060100  | 6.30345600  | 1.59777900  |
| C | 0.68138900  | -0.52669400 | 2.83671200  |
| H | 1.34345800  | 0.23881700  | 2.42360000  |
| H | -0.31329300 | -0.33165700 | 2.42294200  |
| H | 0.64572000  | -0.42459500 | 3.92598800  |

|                    |             |             |             |
|--------------------|-------------|-------------|-------------|
| C                  | 1.71668300  | 2.59047900  | -0.32669800 |
| H                  | 1.69409700  | 3.68095100  | -0.31118400 |
| H                  | 1.29083100  | 2.24574600  | -1.27540000 |
| H                  | 1.05192500  | 2.21280700  | 0.45821600  |
| O                  | -0.37317700 | -2.32179200 | -1.13449200 |
| H                  | -0.94452900 | -2.88462700 | -1.68135200 |
| C                  | 2.13036000  | -3.35117600 | -3.42823200 |
| H                  | 1.39128000  | -3.29411100 | -2.62501600 |
| H                  | 1.57868300  | -3.41641200 | -4.37268500 |
| H                  | 2.72797000  | -4.26589000 | -3.33000400 |
| C                  | 3.94351600  | -2.15499200 | -4.69772400 |
| H                  | 4.57340200  | -3.05096000 | -4.68491700 |
| H                  | 3.33130000  | -2.19203900 | -5.60464300 |
| H                  | 4.59612700  | -1.27677000 | -4.76714800 |
| N                  | 1.50942400  | -0.36920900 | -2.59741800 |
| O                  | 0.66059000  | 0.66835000  | -2.98062700 |
| H                  | -0.24567800 | 0.40516100  | -2.59558500 |
| 3-PC <sub>SB</sub> |             |             |             |
| Zn                 | 1.05394900  | -1.18388900 | -0.66448400 |
| N                  | 1.53031500  | -1.97056300 | 1.30323900  |
| N                  | 3.30989700  | -0.94012600 | -0.55070500 |
| N                  | 1.11001400  | 0.88672600  | -0.71116700 |
| C                  | 0.62050800  | -2.21471900 | 2.27718800  |
| C                  | 1.02913300  | -2.71820200 | 3.51971100  |
| H                  | 0.27883200  | -2.89942900 | 4.28182200  |
| C                  | 2.37578700  | -2.93920600 | 3.77391500  |
| H                  | 2.70296800  | -3.30769900 | 4.74173400  |
| C                  | 3.30392800  | -2.65435600 | 2.77321100  |
| H                  | 4.36916000  | -2.78706400 | 2.93453800  |
| C                  | 2.83866500  | -2.18427000 | 1.55057100  |
| C                  | 3.81293700  | -1.92826000 | 0.42210200  |
| H                  | 4.77901100  | -1.60103600 | 0.83593000  |
| H                  | 3.99480600  | -2.86799300 | -0.10213600 |
| C                  | 3.35665100  | 0.41839300  | 0.06678500  |
| H                  | 4.37276800  | 0.82845500  | 0.04103500  |
| H                  | 3.08035800  | 0.33318900  | 1.12135300  |
| C                  | 2.37260200  | 1.36120100  | -0.57586400 |
| C                  | 2.71257900  | 2.65961700  | -0.91774500 |
| H                  | 3.72238800  | 3.01647300  | -0.75414400 |
| C                  | 1.70476000  | 3.51575100  | -1.36671200 |
| H                  | 1.93475500  | 4.54880200  | -1.60461300 |
| C                  | 0.40341000  | 3.03973700  | -1.45475500 |
| H                  | -0.40921800 | 3.68761900  | -1.76416700 |
| C                  | 0.12178800  | 1.71116200  | -1.11715900 |

|   |             |             |             |
|---|-------------|-------------|-------------|
| C | 4.12344100  | -0.96374900 | -1.79420900 |
| H | 5.16083900  | -1.22433900 | -1.53554800 |
| H | 4.14485600  | 0.05609100  | -2.18903400 |
| C | 3.63477200  | -1.89424800 | -2.93711400 |
| C | 2.38972100  | -1.30223400 | -3.56607700 |
| H | 2.41658700  | -0.94783000 | -4.59909300 |
| P | -1.73999100 | -2.66810100 | -1.64846900 |
| O | -0.49863900 | -2.37545200 | -0.81049800 |
| O | -3.08555100 | -2.43965600 | -0.72406500 |
| O | -2.18068700 | 0.64502400  | 3.27690500  |
| O | -1.87918100 | -1.94345700 | -2.96495700 |
| C | -3.67195200 | -1.19065900 | -0.55632400 |
| C | -4.22218600 | -0.50543700 | -1.64720100 |
| C | -3.71578600 | -0.65501900 | 0.73185200  |
| C | -4.77666800 | 0.75329900  | -1.44683000 |
| H | -4.17469600 | -0.94539900 | -2.63558800 |
| C | -4.25648400 | 0.61177100  | 0.93710100  |
| H | -3.29688200 | -1.19611600 | 1.56874100  |
| C | -4.77086000 | 1.30273400  | -0.16067500 |
| H | -5.19501600 | 1.31681500  | -2.27160000 |
| H | -4.21925800 | 1.05563000  | 1.92443600  |
| C | -1.12441400 | 1.28734300  | 3.02364700  |
| C | 0.18494900  | 0.82430000  | 3.45882800  |
| C | -1.12190200 | 2.53027200  | 2.26950600  |
| C | 1.34518500  | 1.47226100  | 3.11996400  |
| H | 0.21237200  | -0.05739000 | 4.09072100  |
| C | 0.03889800  | 3.19811400  | 1.96847900  |
| H | -2.08753400 | 2.92702500  | 1.96656900  |
| C | 1.29692400  | 2.66646600  | 2.35748600  |
| H | 2.30968900  | 1.10721100  | 3.45804600  |
| H | 0.02106200  | 4.12946800  | 1.41421100  |
| N | -5.29180400 | 2.66295200  | 0.02928500  |
| O | -5.26309000 | 3.14175800  | 1.16411500  |
| O | -5.71854800 | 3.26228900  | -0.96436700 |
| N | 2.49025400  | 3.30937500  | 1.98168100  |
| O | 2.44554800  | 4.44560000  | 1.45492700  |
| O | 3.58690200  | 2.70146100  | 2.13207600  |
| C | -0.82410000 | -1.92599800 | 2.02329500  |
| H | -0.93685800 | -1.07859500 | 1.34918400  |
| H | -1.30862700 | -2.78709100 | 1.55275200  |
| H | -1.34063700 | -1.66651600 | 2.94971000  |
| C | -1.26894400 | 1.16351800  | -1.14784500 |
| H | -1.99293500 | 1.92828400  | -1.43515100 |
| H | -1.35269900 | 0.33823800  | -1.85772200 |



|   |             |             |             |
|---|-------------|-------------|-------------|
| H | -1.54349900 | 0.79754000  | -0.15420500 |
| O | -1.78350500 | -4.27880800 | -1.78078600 |
| H | -2.51662900 | -4.57272500 | -2.34683900 |
| C | 3.33714600  | -3.34010400 | -2.48501900 |
| H | 2.52977900  | -3.38448200 | -1.74751600 |
| H | 3.01679800  | -3.93779900 | -3.34452500 |
| H | 4.23453600  | -3.81136000 | -2.06743200 |
| C | 4.74726700  | -1.91523500 | -4.00574000 |
| H | 5.65746200  | -2.37464900 | -3.60604900 |
| H | 4.43234900  | -2.49733800 | -4.87852200 |
| H | 4.99709000  | -0.90326800 | -4.34644100 |
| N | 1.29200000  | -1.21186300 | -2.92130200 |
| O | 0.28524400  | -0.60096700 | -3.65328800 |
| H | -0.55828700 | -1.08699800 | -3.39577300 |

1-RC<sub>LB</sub>

|    |             |             |             |
|----|-------------|-------------|-------------|
| Zn | -0.58758800 | -1.14995300 | 0.56220400  |
| N  | -2.22372400 | 0.34957900  | 0.30441200  |
| N  | -1.84531900 | -1.88928600 | -1.19540400 |
| N  | -1.79217700 | -2.64424600 | 1.51872600  |
| O  | 0.90453600  | -2.29049600 | 0.24879900  |
| C  | -2.71108700 | 1.19381800  | 1.23696800  |
| C  | -3.64020600 | 2.17958700  | 0.88840000  |
| H  | -4.01771900 | 2.85315300  | 1.64944300  |
| C  | -4.05896600 | 2.29125400  | -0.43501000 |
| H  | -4.76748000 | 3.06219800  | -0.72428900 |
| C  | -3.56748200 | 1.39208900  | -1.38083300 |
| H  | -3.89199700 | 1.42915200  | -2.41597600 |
| C  | -2.65345800 | 0.42621500  | -0.96821200 |
| C  | -2.12173500 | -0.63019800 | -1.91503500 |
| H  | -2.83578000 | -0.78294800 | -2.74048000 |
| H  | -1.17832200 | -0.27827100 | -2.34197900 |
| C  | -3.05798500 | -2.43938400 | -0.54401300 |
| H  | -3.63424300 | -3.06857400 | -1.23717400 |
| H  | -3.70861900 | -1.61150000 | -0.25022700 |
| C  | -2.70255300 | -3.21787200 | 0.70950400  |
| C  | -3.28547300 | -4.44250300 | 1.02384800  |
| H  | -4.01133600 | -4.88937900 | 0.35186500  |
| C  | -2.90529300 | -5.07811600 | 2.20738900  |
| H  | -3.34222500 | -6.03463600 | 2.47987100  |
| C  | -1.94321000 | -4.48729000 | 3.02269200  |
| H  | -1.60905800 | -4.97111100 | 3.93454200  |
| C  | -1.38327000 | -3.26167000 | 2.64429100  |
| C  | -1.21377100 | -2.92593900 | -2.06994100 |

|   |             |             |             |
|---|-------------|-------------|-------------|
| H | -1.56964000 | -2.77244300 | -3.10195000 |
| H | -1.61505300 | -3.89057100 | -1.74180800 |
| C | 0.32463300  | -3.05712000 | -2.05619800 |
| C | 0.83401100  | -3.37440900 | -0.61740600 |
| H | 1.84331400  | -3.81238200 | -0.72006300 |
| P | 1.01970600  | 1.38998900  | 0.36802900  |
| O | 0.55833700  | 1.23527500  | -1.04828900 |
| O | 2.63600300  | 1.62491000  | 0.50784700  |
| O | 0.65729400  | 2.87571600  | 1.01701300  |
| O | 0.54839600  | 0.35229700  | 1.38827900  |
| C | 3.59462200  | 0.78056900  | -0.00619900 |
| C | 3.39522100  | -0.59566300 | -0.16125200 |
| C | 4.81284400  | 1.38414100  | -0.34400700 |
| C | 4.43124900  | -1.36677500 | -0.67787400 |
| H | 2.45448400  | -1.08147500 | 0.10169500  |
| C | 5.84777900  | 0.61115900  | -0.85226400 |
| H | 4.92573300  | 2.45396600  | -0.20498200 |
| C | 5.64364100  | -0.76256500 | -1.01968100 |
| H | 4.30245200  | -2.43382300 | -0.81217400 |
| H | 6.79790800  | 1.05303200  | -1.12538800 |
| C | -0.38122500 | 3.68223700  | 0.65888700  |
| C | -0.79215500 | 3.86999200  | -0.67082900 |
| C | -1.00827400 | 4.37714500  | 1.70569200  |
| C | -1.86148600 | 4.71521200  | -0.93735900 |
| H | -0.29160000 | 3.33241800  | -1.46549600 |
| C | -2.06773700 | 5.23158400  | 1.43800600  |
| H | -0.64993400 | 4.22365700  | 2.71783800  |
| C | -2.49844100 | 5.37787300  | 0.11560300  |
| H | -2.21113200 | 4.86269300  | -1.95172800 |
| H | -2.57361400 | 5.76717800  | 2.23202600  |
| N | 6.72394100  | -1.58285100 | -1.56804100 |
| O | 7.79584400  | -1.03031500 | -1.83872300 |
| O | 6.51194600  | -2.78867600 | -1.73661500 |
| N | -3.66888200 | 6.20492000  | -0.16569200 |
| O | -4.17218600 | 6.84094100  | 0.76645000  |
| O | -4.11362900 | 6.20898300  | -1.31996800 |
| C | 0.64818200  | -4.26816800 | -2.95399400 |
| H | 0.24660300  | -4.14001600 | -3.96710700 |
| H | 1.73248800  | -4.39572300 | -3.04098300 |
| H | 0.23466300  | -5.19813300 | -2.54124600 |
| C | 1.02489400  | -1.80858800 | -2.60740300 |
| H | 0.67566100  | -1.57671000 | -3.62267000 |
| H | 0.87096200  | -0.93325900 | -1.97353900 |
| H | 2.10715400  | -1.97463300 | -2.65614300 |

|                    |             |             |             |
|--------------------|-------------|-------------|-------------|
| C                  | -2.23796300 | 1.00581500  | 2.65167500  |
| H                  | -2.52188900 | 0.00789700  | 3.00873300  |
| H                  | -1.14648900 | 1.06773800  | 2.69352400  |
| H                  | -2.67585300 | 1.75275900  | 3.31853400  |
| C                  | -0.27453300 | -2.59052700 | 3.40355000  |
| H                  | 0.61998300  | -2.56873700 | 2.76658700  |
| H                  | -0.52988900 | -1.54814100 | 3.62541000  |
| H                  | -0.04793700 | -3.10878200 | 4.33875800  |
| H                  | 0.19117400  | -4.18668800 | -0.21119100 |
| 1-TS <sub>LB</sub> |             |             |             |
| Zn                 | -1.40005300 | -0.83361500 | 0.35486900  |
| N                  | -3.13756400 | 0.27767200  | 0.05007300  |
| N                  | -2.60027400 | -2.28496400 | -0.76750900 |
| N                  | -1.52869000 | -2.26349700 | 1.84814200  |
| O                  | 0.42261500  | -1.64925900 | -0.44386100 |
| C                  | -3.35716700 | 1.49095000  | 0.61732200  |
| C                  | -4.37590900 | 2.31620100  | 0.13725600  |
| H                  | -4.52114600 | 3.29890600  | 0.57238300  |
| C                  | -5.16819500 | 1.87913500  | -0.92241900 |
| H                  | -5.94291700 | 2.52725500  | -1.31977300 |
| C                  | -4.95263800 | 0.61332500  | -1.46756200 |
| H                  | -5.55981700 | 0.23915100  | -2.28647800 |
| C                  | -3.91391800 | -0.16039700 | -0.95765600 |
| C                  | -3.57973300 | -1.51545700 | -1.56704500 |
| H                  | -4.50260800 | -2.09840200 | -1.71202800 |
| H                  | -3.15898800 | -1.35132200 | -2.55747000 |
| C                  | -3.30528800 | -2.95591100 | 0.35799000  |
| H                  | -3.81112300 | -3.86900300 | 0.01416700  |
| H                  | -4.07729400 | -2.26582700 | 0.71695300  |
| C                  | -2.37699000 | -3.25826400 | 1.51740200  |
| C                  | -2.41003100 | -4.45319600 | 2.22485200  |
| H                  | -3.09641000 | -5.24246800 | 1.93584400  |
| C                  | -1.53904400 | -4.60555800 | 3.30774700  |
| H                  | -1.53959800 | -5.52622500 | 3.88400900  |
| C                  | -0.66452000 | -3.57453600 | 3.63484200  |
| H                  | 0.02810600  | -3.67330900 | 4.46389400  |
| C                  | -0.66354500 | -2.39700400 | 2.87460500  |
| C                  | -1.84817300 | -3.29104800 | -1.58544100 |
| H                  | -2.56500500 | -3.76156400 | -2.27701400 |
| H                  | -1.52443200 | -4.07219000 | -0.88897300 |
| C                  | -0.59299700 | -2.82611000 | -2.37861000 |
| C                  | 0.62748600  | -2.63712300 | -1.44615800 |
| H                  | 1.49696300  | -2.36370100 | -2.05249600 |
| P                  | 1.14792900  | -0.01570900 | -0.52185600 |

|   |             |             |             |
|---|-------------|-------------|-------------|
| O | 1.40800800  | 0.13248400  | -1.98420900 |
| O | 2.41401300  | -0.44513700 | 0.44456700  |
| O | 1.90578400  | 2.09351100  | -0.15219000 |
| O | -0.02095000 | 0.50973600  | 0.36018700  |
| C | 3.72362800  | -0.05529700 | 0.33662200  |
| C | 4.28194000  | 0.51709000  | -0.81528100 |
| C | 4.51247300  | -0.31704700 | 1.46463800  |
| C | 5.63770400  | 0.81821500  | -0.82784400 |
| H | 3.65029700  | 0.73945000  | -1.66488700 |
| C | 5.86690200  | -0.01764400 | 1.45178200  |
| H | 4.04397800  | -0.75208700 | 2.34119700  |
| C | 6.42058800  | 0.54657000  | 0.29896200  |
| H | 6.09535600  | 1.26617700  | -1.70128700 |
| H | 6.49461700  | -0.21029100 | 2.31281600  |
| C | 0.94290700  | 2.94127600  | -0.28016000 |
| C | 0.11215400  | 2.98695700  | -1.45499100 |
| C | 0.59915600  | 3.83558300  | 0.78830200  |
| C | -1.05870300 | 3.70718300  | -1.47424000 |
| H | 0.40306600  | 2.36987300  | -2.29759300 |
| C | -0.57759800 | 4.55117800  | 0.77275400  |
| H | 1.26012700  | 3.86433800  | 1.64935200  |
| C | -1.44450600 | 4.45695800  | -0.33916100 |
| H | -1.71676700 | 3.68614800  | -2.33565400 |
| H | -0.87522200 | 5.16012800  | 1.61897900  |
| N | 7.84849500  | 0.85549700  | 0.27357400  |
| O | 8.51514100  | 0.61526200  | 1.28770900  |
| O | 8.32351700  | 1.33876000  | -0.75960500 |
| N | -2.74690500 | 5.01684800  | -0.27718800 |
| O | -3.15774900 | 5.48434800  | 0.81194000  |
| O | -3.48399500 | 4.96956200  | -1.28781300 |
| C | -0.24090200 | -3.99041000 | -3.32965000 |
| H | -1.03770500 | -4.15433800 | -4.06432000 |
| H | 0.67820000  | -3.76612400 | -3.88126300 |
| H | -0.08446500 | -4.92974200 | -2.78400900 |
| C | -0.82926400 | -1.55506800 | -3.20979100 |
| H | -1.63367200 | -1.70594300 | -3.94160000 |
| H | -1.06187000 | -0.68734400 | -2.58623000 |
| H | 0.08151300  | -1.28826100 | -3.75068500 |
| C | -2.46345400 | 1.88859100  | 1.75445000  |
| H | -2.49735800 | 1.12708700  | 2.54531500  |
| H | -1.42834300 | 1.97019900  | 1.40824100  |
| H | -2.76457800 | 2.85170600  | 2.17108300  |
| C | 0.29836200  | -1.27225900 | 3.12251900  |
| H | 1.09379800  | -1.28986800 | 2.36785600  |

|                    |             |             |             |
|--------------------|-------------|-------------|-------------|
| H                  | -0.19268800 | -0.29993000 | 3.02117900  |
| H                  | 0.75022900  | -1.34902600 | 4.11476600  |
| H                  | 0.84361100  | -3.58403100 | -0.93105100 |
| 1-PC <sub>LB</sub> |             |             |             |
| Zn                 | -0.85633600 | -0.36054900 | 0.32579100  |
| N                  | -2.30821200 | 0.99883600  | 0.57600200  |
| N                  | -2.43172900 | -1.48575500 | -0.62856000 |
| N                  | -0.96059400 | -1.88564500 | 1.75913300  |
| O                  | 0.73851500  | -2.32105600 | -0.90492000 |
| C                  | -2.24273700 | 2.05702600  | 1.41202900  |
| C                  | -3.33021400 | 2.92740600  | 1.50869500  |
| H                  | -3.26481100 | 3.78774000  | 2.16527800  |
| C                  | -4.46452300 | 2.70129300  | 0.73317000  |
| H                  | -5.30096300 | 3.39082200  | 0.76858600  |
| C                  | -4.51337500 | 1.59492400  | -0.11701500 |
| H                  | -5.36313900 | 1.42054700  | -0.76621100 |
| C                  | -3.40291700 | 0.76679600  | -0.18354300 |
| C                  | -3.32635300 | -0.40622200 | -1.14261500 |
| H                  | -4.33324800 | -0.79929600 | -1.33890000 |
| H                  | -2.93453800 | -0.03392800 | -2.09024700 |
| C                  | -3.05718300 | -2.11226700 | 0.57453500  |
| H                  | -3.79245500 | -2.87169300 | 0.27963300  |
| H                  | -3.59975800 | -1.33154700 | 1.11741400  |
| C                  | -2.01730500 | -2.69144900 | 1.50913200  |
| C                  | -2.15094700 | -3.93214500 | 2.11486500  |
| H                  | -3.00593400 | -4.56159400 | 1.89045300  |
| C                  | -1.16246300 | -4.34072500 | 3.01681800  |
| H                  | -1.23462400 | -5.30694600 | 3.50751200  |
| C                  | -0.08808900 | -3.50001800 | 3.27646700  |
| H                  | 0.69273600  | -3.78949900 | 3.97215500  |
| C                  | 0.00250900  | -2.26149900 | 2.62271100  |
| C                  | -2.19520700 | -2.56669300 | -1.65054000 |
| H                  | -3.14273100 | -2.69224500 | -2.19424400 |
| H                  | -2.03069200 | -3.48999800 | -1.08607200 |
| C                  | -1.03727800 | -2.44485600 | -2.68001200 |
| C                  | 0.29619200  | -2.98064300 | -2.10674300 |
| H                  | 1.07556700  | -2.90234600 | -2.87056200 |
| P                  | 1.69944000  | -0.99258600 | -0.98436800 |
| O                  | 2.13860800  | -0.65742500 | -2.36080800 |
| O                  | 2.93174200  | -1.49947100 | -0.01595800 |
| O                  | 1.65186100  | 3.18332800  | -0.18068700 |
| O                  | 0.91749900  | 0.03643500  | -0.12927000 |
| C                  | 3.86912100  | -0.63949000 | 0.52686200  |
| C                  | 3.76526800  | 0.75904000  | 0.49388400  |

|                    |             |             |             |
|--------------------|-------------|-------------|-------------|
| C                  | 4.94311800  | -1.27323000 | 1.16623000  |
| C                  | 4.75072800  | 1.51737200  | 1.12080800  |
| H                  | 2.93655400  | 1.28158900  | 0.02268700  |
| C                  | 5.92224000  | -0.51457900 | 1.79149700  |
| H                  | 4.99358500  | -2.35708900 | 1.15661300  |
| C                  | 5.81270800  | 0.87927200  | 1.76550400  |
| H                  | 4.68273100  | 2.59850900  | 1.11196300  |
| H                  | 6.76153400  | -0.98104300 | 2.29204300  |
| C                  | 0.56565200  | 3.27769300  | -0.81249900 |
| C                  | 0.22363300  | 2.39711300  | -1.92203800 |
| C                  | -0.44791700 | 4.26330700  | -0.46553400 |
| C                  | -1.03095600 | 2.38995500  | -2.47232300 |
| H                  | 0.99516000  | 1.72467800  | -2.28182000 |
| C                  | -1.69707100 | 4.25799200  | -1.03169000 |
| H                  | -0.18389800 | 4.99138400  | 0.29673800  |
| C                  | -2.03558000 | 3.27784300  | -2.00170200 |
| H                  | -1.27992500 | 1.72327700  | -3.28907800 |
| H                  | -2.45681400 | 4.96939300  | -0.72732500 |
| N                  | 6.83563800  | 1.68327100  | 2.43959300  |
| O                  | 7.75581200  | 1.08835500  | 3.01321800  |
| O                  | 6.72645700  | 2.91135600  | 2.40574500  |
| N                  | -3.36239600 | 3.12247400  | -2.42355300 |
| O                  | -4.23763400 | 3.94747700  | -2.05970300 |
| O                  | -3.67590600 | 2.10272800  | -3.10535200 |
| C                  | -1.39528000 | -3.40627000 | -3.83728500 |
| H                  | -2.29253800 | -3.06110500 | -4.36207600 |
| H                  | -0.57972500 | -3.44787300 | -4.56706800 |
| H                  | -1.58095800 | -4.42699800 | -3.47918600 |
| C                  | -0.87816400 | -1.02752300 | -3.24223000 |
| H                  | -1.78456700 | -0.70990100 | -3.76957800 |
| H                  | -0.66283500 | -0.29295400 | -2.46476300 |
| H                  | -0.03915200 | -0.98523300 | -3.94142600 |
| C                  | -0.97446100 | 2.21728000  | 2.20153400  |
| H                  | -0.85162300 | 1.37218400  | 2.89281000  |
| H                  | -0.10121300 | 2.25091200  | 1.53854000  |
| H                  | -0.98485800 | 3.13858100  | 2.78785400  |
| C                  | 1.17463900  | -1.34874600 | 2.84241200  |
| H                  | 2.03328500  | -1.70483300 | 2.26402000  |
| H                  | 0.96867000  | -0.33099500 | 2.50637300  |
| H                  | 1.46093200  | -1.33181200 | 3.89859900  |
| H                  | 0.18122800  | -4.03267400 | -1.82377400 |
| 2-RC <sub>LB</sub> |             |             |             |
| Zn                 | -0.57991800 | -1.23525200 | 0.53132500  |
| N                  | -2.23301200 | 0.31189300  | 0.29713400  |

|   |             |             |             |
|---|-------------|-------------|-------------|
| N | -1.83426400 | -1.92816900 | -1.18859500 |
| N | -1.79734600 | -2.63488000 | 1.54739200  |
| O | 0.92956300  | -2.38956900 | 0.19680500  |
| C | -2.71286700 | 1.16599000  | 1.22353200  |
| C | -3.62850900 | 2.16228000  | 0.86862800  |
| H | -3.99896300 | 2.84484200  | 1.62512800  |
| C | -4.04175700 | 2.27321600  | -0.45678800 |
| H | -4.73939900 | 3.05198900  | -0.75146500 |
| C | -3.55913400 | 1.36353000  | -1.39706300 |
| H | -3.87953300 | 1.40018100  | -2.43359500 |
| C | -2.65838300 | 0.38833900  | -0.97577700 |
| C | -2.13247100 | -0.67641800 | -1.91661900 |
| H | -2.85752800 | -0.84750400 | -2.72835300 |
| H | -1.20007700 | -0.32290500 | -2.36455200 |
| C | -3.04618100 | -2.48334900 | -0.53390900 |
| H | -3.59637400 | -3.14276500 | -1.21842000 |
| H | -3.71821900 | -1.65931000 | -0.27895600 |
| C | -2.71187200 | -3.21753200 | 0.75183600  |
| C | -3.32849800 | -4.41286200 | 1.11014900  |
| H | -4.05473200 | -4.87205000 | 0.44730100  |
| C | -2.97129500 | -5.01122000 | 2.31842000  |
| H | -3.42834200 | -5.94915000 | 2.62070300  |
| C | -2.00723900 | -4.40794800 | 3.12429300  |
| H | -1.69586300 | -4.86205800 | 4.05928500  |
| C | -1.41991900 | -3.21018100 | 2.70562000  |
| C | -1.21132800 | -2.96738500 | -2.07240600 |
| H | -1.59414900 | -2.82092100 | -3.09477300 |
| H | -1.57995400 | -3.93197500 | -1.72145100 |
| C | 0.32723100  | -3.07145600 | -2.11388700 |
| C | 0.90969900  | -3.41117600 | -0.70680100 |
| H | 1.94687900  | -3.76459200 | -0.86265000 |
| P | 0.99494600  | 1.32718400  | 0.37869800  |
| O | 0.54248900  | 1.20395700  | -1.04275700 |
| O | 2.60540500  | 1.59726600  | 0.52918100  |
| O | 0.58514300  | 2.77185400  | 1.08175000  |
| O | 0.55734900  | 0.24018200  | 1.36364300  |
| C | 3.58020100  | 0.77744300  | 0.00572100  |
| C | 3.40461200  | -0.59961800 | -0.17061600 |
| C | 4.78906000  | 1.40536300  | -0.31990000 |
| C | 4.45369700  | -1.34706100 | -0.69522400 |
| H | 2.47315400  | -1.10126600 | 0.08615200  |
| C | 5.83781700  | 0.65632000  | -0.83590200 |
| H | 4.88420900  | 2.47472700  | -0.16517200 |
| C | 5.65685100  | -0.71787100 | -1.02365800 |

|                    |             |             |             |
|--------------------|-------------|-------------|-------------|
| H                  | 4.34278400  | -2.41399700 | -0.84619000 |
| H                  | 6.78157800  | 1.11724700  | -1.09946300 |
| C                  | -0.40756200 | 3.62466400  | 0.69856600  |
| C                  | -0.78041400 | 3.83794500  | -0.63804400 |
| C                  | -1.03396600 | 4.33212800  | 1.73737200  |
| C                  | -1.81679200 | 4.71889700  | -0.91993600 |
| H                  | -0.28129000 | 3.29172000  | -1.42747500 |
| C                  | -2.05986300 | 5.22149700  | 1.45432800  |
| H                  | -0.70382300 | 4.15856500  | 2.75583000  |
| C                  | -2.45691300 | 5.39166600  | 0.12424700  |
| H                  | -2.13830700 | 4.88584300  | -1.94060500 |
| H                  | -2.56528800 | 5.76705400  | 2.24180800  |
| N                  | 6.75322300  | -1.51284000 | -1.57885100 |
| O                  | 7.81512300  | -0.93771600 | -1.84065100 |
| O                  | 6.56281000  | -2.72003200 | -1.76050000 |
| N                  | -3.59250200 | 6.26061000  | -0.17555000 |
| O                  | -4.09850500 | 6.90014700  | 0.75264100  |
| O                  | -4.00539600 | 6.29575200  | -1.34070300 |
| O                  | 0.13982200  | -4.54461800 | -0.21324600 |
| H                  | 0.41177300  | -4.65154300 | 0.71121000  |
| C                  | 0.64552800  | -4.23873700 | -3.07215200 |
| H                  | 0.27299900  | -4.03156300 | -4.08330000 |
| H                  | 1.72948800  | -4.38199500 | -3.14304600 |
| H                  | 0.20534900  | -5.17708300 | -2.72091600 |
| C                  | 1.00213600  | -1.79591100 | -2.63581000 |
| H                  | 0.63840300  | -1.55019600 | -3.64208700 |
| H                  | 0.84212700  | -0.93480400 | -1.98469000 |
| H                  | 2.08653800  | -1.94267600 | -2.70259200 |
| C                  | -2.24704700 | 0.97609600  | 2.64086700  |
| H                  | -2.58969700 | 0.00396700  | 3.01705400  |
| H                  | -1.15397700 | 0.97599100  | 2.68117500  |
| H                  | -2.63868900 | 1.75913600  | 3.29511200  |
| C                  | -0.31553700 | -2.52272400 | 3.45954200  |
| H                  | 0.59020800  | -2.51037800 | 2.83947100  |
| H                  | -0.57327200 | -1.47659900 | 3.65782000  |
| H                  | -0.09865700 | -3.02126700 | 4.40775600  |
| 2-TS <sub>LB</sub> |             |             |             |
| Zn                 | -1.42201600 | -0.81287200 | 0.32161100  |
| N                  | -3.15722200 | 0.27768300  | 0.01667000  |
| N                  | -2.61220900 | -2.29761300 | -0.76884100 |
| N                  | -1.51054000 | -2.21039600 | 1.84236000  |
| O                  | 0.38936100  | -1.65455400 | -0.53277300 |
| C                  | -3.38084000 | 1.49470900  | 0.57459300  |
| C                  | -4.41641200 | 2.30302400  | 0.10164000  |



|   |             |             |             |
|---|-------------|-------------|-------------|
| H | -4.56250800 | 3.29060400  | 0.52525200  |
| C | -5.22433700 | 1.84036100  | -0.93535100 |
| H | -6.01582900 | 2.47245700  | -1.32569900 |
| C | -5.00667000 | 0.56866500  | -1.46608800 |
| H | -5.62794300 | 0.17518000  | -2.26510600 |
| C | -3.94835700 | -0.18596700 | -0.96836400 |
| C | -3.61176500 | -1.54754900 | -1.56217900 |
| H | -4.53239300 | -2.13942900 | -1.68293100 |
| H | -3.20896900 | -1.39596800 | -2.56238300 |
| C | -3.28817300 | -2.95684600 | 0.38128100  |
| H | -3.79183400 | -3.87953400 | 0.06179000  |
| H | -4.05842200 | -2.26837000 | 0.74735700  |
| C | -2.33055600 | -3.23269000 | 1.52291600  |
| C | -2.31085900 | -4.42999000 | 2.22580300  |
| H | -2.97323600 | -5.24170700 | 1.94360800  |
| C | -1.41581100 | -4.55732900 | 3.29176200  |
| H | -1.37203700 | -5.48112900 | 3.86122100  |
| C | -0.57672400 | -3.49536800 | 3.61292500  |
| H | 0.12918900  | -3.57115400 | 4.43322100  |
| C | -0.63094800 | -2.31523900 | 2.85957500  |
| C | -1.87482900 | -3.31954400 | -1.58302100 |
| H | -2.60150200 | -3.79504100 | -2.25938700 |
| H | -1.53253200 | -4.08827700 | -0.88601700 |
| C | -0.63632400 | -2.86818600 | -2.40496300 |
| C | 0.60123700  | -2.66662800 | -1.49411300 |
| H | 1.45790600  | -2.38120900 | -2.11706100 |
| P | 1.14701200  | -0.04429600 | -0.58614000 |
| O | 1.43187300  | 0.14085700  | -2.03673900 |
| O | 2.40206600  | -0.51139500 | 0.37641600  |
| O | 1.97542600  | 2.10566400  | -0.14845500 |
| O | -0.01008200 | 0.50525200  | 0.28801300  |
| C | 3.71122000  | -0.09614100 | 0.31157400  |
| C | 4.29729600  | 0.46588700  | -0.83027000 |
| C | 4.46311500  | -0.32996900 | 1.46898600  |
| C | 5.64874400  | 0.78590800  | -0.80310000 |
| H | 3.68963400  | 0.66989700  | -1.70180200 |
| C | 5.81378800  | -0.01225400 | 1.49589700  |
| H | 3.97126700  | -0.75530100 | 2.33755700  |
| C | 6.39660800  | 0.54150300  | 0.35305400  |
| H | 6.12906100  | 1.22773500  | -1.66739800 |
| H | 6.41524800  | -0.18180300 | 2.38019100  |
| C | 1.01421200  | 2.95337500  | -0.25290900 |
| C | 0.19610800  | 3.04211900  | -1.43617000 |
| C | 0.65084900  | 3.80601600  | 0.84555200  |

|                    |             |             |             |
|--------------------|-------------|-------------|-------------|
| C                  | -0.98184500 | 3.74978600  | -1.43942100 |
| H                  | 0.50150200  | 2.46011400  | -2.29867800 |
| C                  | -0.53206800 | 4.50979900  | 0.84487100  |
| H                  | 1.30408800  | 3.81010700  | 1.71308500  |
| C                  | -1.38870400 | 4.44904600  | -0.27848300 |
| H                  | -1.63179700 | 3.75531800  | -2.30727200 |
| H                  | -0.84412500 | 5.08346900  | 1.71045300  |
| N                  | 7.82179900  | 0.86964600  | 0.36972300  |
| O                  | 8.45693900  | 0.65256900  | 1.40843100  |
| O                  | 8.32306200  | 1.34434400  | -0.65435400 |
| N                  | -2.70030500 | 4.97917300  | -0.20286300 |
| O                  | -3.13338800 | 5.37933700  | 0.90633800  |
| O                  | -3.42756200 | 4.97218200  | -1.22235900 |
| O                  | 0.85794100  | -3.88094600 | -0.80975900 |
| H                  | 1.61236700  | -3.72400500 | -0.21992500 |
| C                  | -0.31790900 | -4.02305600 | -3.37939600 |
| H                  | -1.12164100 | -4.13785000 | -4.11594600 |
| H                  | 0.60754100  | -3.81206400 | -3.92615300 |
| H                  | -0.18603700 | -4.97132800 | -2.85079200 |
| C                  | -0.86011700 | -1.58148700 | -3.21661400 |
| H                  | -1.65830600 | -1.72546100 | -3.95513800 |
| H                  | -1.10005400 | -0.72002200 | -2.58733700 |
| H                  | 0.05283000  | -1.30838300 | -3.75146800 |
| C                  | -2.48021400 | 1.90749200  | 1.70097400  |
| H                  | -2.53933200 | 1.17313300  | 2.51611400  |
| H                  | -1.44138900 | 1.95414100  | 1.35954200  |
| H                  | -2.75895600 | 2.89103100  | 2.08419400  |
| C                  | 0.28309400  | -1.15117800 | 3.11190100  |
| H                  | 1.08464200  | -1.13046800 | 2.36425200  |
| H                  | -0.24985000 | -0.20121400 | 3.01139500  |
| H                  | 0.73162800  | -1.21015100 | 4.10698800  |
| 2-PC <sub>LB</sub> |             |             |             |
| Zn                 | -0.89941700 | -0.45029000 | 0.25894900  |
| N                  | -2.37205300 | 0.86464600  | 0.56503500  |
| N                  | -2.48539200 | -1.64637300 | -0.59786200 |
| N                  | -0.86949600 | -1.93188800 | 1.73500700  |
| O                  | 0.63203900  | -2.45079400 | -1.00781800 |
| C                  | -2.29343100 | 1.93491600  | 1.38467500  |
| C                  | -3.39315400 | 2.78496900  | 1.51367500  |
| H                  | -3.31932000 | 3.65537000  | 2.15594500  |
| C                  | -4.55248900 | 2.52562900  | 0.78656900  |
| H                  | -5.39972800 | 3.20031900  | 0.84487600  |
| C                  | -4.61589800 | 1.40294100  | -0.04075300 |
| H                  | -5.48986300 | 1.19949600  | -0.64811900 |

|   |             |             |             |
|---|-------------|-------------|-------------|
| C | -3.49374700 | 0.59356100  | -0.13945800 |
| C | -3.43852600 | -0.60074300 | -1.07357500 |
| H | -4.44458700 | -1.02326600 | -1.20158200 |
| H | -3.11206200 | -0.24141500 | -2.05153600 |
| C | -3.00247100 | -2.27330400 | 0.65665400  |
| H | -3.73623400 | -3.05592700 | 0.42747100  |
| H | -3.51965900 | -1.49964200 | 1.23320200  |
| C | -1.87166300 | -2.81050500 | 1.50815000  |
| C | -1.86141900 | -4.08650900 | 2.05174000  |
| H | -2.67153200 | -4.77701600 | 1.84192600  |
| C | -0.77938900 | -4.45512100 | 2.85808300  |
| H | -0.73173700 | -5.45184900 | 3.28682800  |
| C | 0.23366300  | -3.53618100 | 3.10434600  |
| H | 1.08010000  | -3.79254600 | 3.73285300  |
| C | 0.16866100  | -2.25858800 | 2.52997100  |
| C | -2.29738000 | -2.74056700 | -1.61788400 |
| H | -3.26682600 | -2.87006600 | -2.11822000 |
| H | -2.09962300 | -3.65930100 | -1.06188200 |
| C | -1.19127900 | -2.62633300 | -2.69960100 |
| C | 0.16536300  | -3.15942700 | -2.17149400 |
| H | 0.92386900  | -3.06037500 | -2.95673000 |
| P | 1.62277800  | -1.14357000 | -1.11999200 |
| O | 2.10211100  | -0.88145900 | -2.49788900 |
| O | 2.81129400  | -1.64815100 | -0.09607800 |
| O | 1.54571400  | 3.05004900  | -0.36691400 |
| O | 0.84254800  | -0.06658300 | -0.32897300 |
| C | 3.70669300  | -0.79371300 | 0.51771900  |
| C | 3.63598400  | 0.60597000  | 0.44832900  |
| C | 4.70037800  | -1.43283900 | 1.27218100  |
| C | 4.56674400  | 1.35874300  | 1.16037000  |
| H | 2.86720500  | 1.13382400  | -0.11027900 |
| C | 5.62611600  | -0.67963600 | 1.97989500  |
| H | 4.73034900  | -2.51744300 | 1.28698200  |
| C | 5.54524900  | 0.71518700  | 1.92090000  |
| H | 4.51998300  | 2.44057600  | 1.12744700  |
| H | 6.40189100  | -1.15087800 | 2.57043800  |
| C | 0.43878400  | 3.13203200  | -0.96419500 |
| C | 0.06981000  | 2.24571200  | -2.06018900 |
| C | -0.57468500 | 4.10644700  | -0.58679000 |
| C | -1.20470100 | 2.21543200  | -2.56207500 |
| H | 0.83857800  | 1.58551700  | -2.44711300 |
| C | -1.84416400 | 4.07989800  | -1.10586100 |
| H | -0.29380500 | 4.84188900  | 0.16226900  |
| C | -2.20435700 | 3.08897900  | -2.05636200 |

|   |             |             |             |
|---|-------------|-------------|-------------|
| H | -1.47413800 | 1.53981100  | -3.36494700 |
| H | -2.60243500 | 4.78171500  | -0.77675000 |
| N | 6.50730700  | 1.51408300  | 2.68511300  |
| O | 7.35115500  | 0.91364600  | 3.36091500  |
| O | 6.42431000  | 2.74274400  | 2.62045300  |
| N | -3.54480700 | 2.90907800  | -2.42435900 |
| O | -4.41689100 | 3.72576100  | -2.03649900 |
| O | -3.86819300 | 1.87775700  | -3.08286900 |
| O | 0.00065300  | -4.49718300 | -1.77751800 |
| H | 0.85275100  | -4.82039100 | -1.44405600 |
| C | -1.61231100 | -3.56085800 | -3.85815300 |
| H | -2.50456100 | -3.16462400 | -4.35479300 |
| H | -0.81432700 | -3.62400500 | -4.60604800 |
| H | -1.82327600 | -4.57399900 | -3.50505900 |
| C | -1.01906400 | -1.20732900 | -3.25523400 |
| H | -1.93253700 | -0.88301500 | -3.76455200 |
| H | -0.78683600 | -0.47177600 | -2.48417500 |
| H | -0.19667600 | -1.17054100 | -3.97503700 |
| C | -0.99862400 | 2.12655900  | 2.12254200  |
| H | -0.82681000 | 1.28472800  | 2.80704500  |
| H | -0.15294100 | 2.17981400  | 1.42613100  |
| H | -1.00742600 | 3.04831500  | 2.70821100  |
| C | 1.20591000  | -1.20862600 | 2.81253900  |
| H | 2.18998800  | -1.65474500 | 2.97753900  |
| H | 1.28924900  | -0.49449400 | 1.99190500  |
| H | 0.93241700  | -0.65409700 | 3.71992200  |

### 3-RC<sub>LB</sub>

|    |             |             |             |
|----|-------------|-------------|-------------|
| Zn | -1.55696100 | -0.41475000 | -0.40208500 |
| N  | -2.63042800 | -0.57645700 | -2.42560700 |
| N  | -3.73895600 | -0.47886100 | 0.10638100  |
| N  | -1.95526500 | 1.39267100  | 0.82043200  |
| C  | -2.16169800 | -0.34474700 | -3.67677600 |
| C  | -2.94273500 | -0.64496100 | -4.80245500 |
| H  | -2.53682100 | -0.45435000 | -5.79020800 |
| C  | -4.21896600 | -1.17083200 | -4.64741800 |
| H  | -4.83264400 | -1.40033500 | -5.51386400 |
| C  | -4.70094500 | -1.38325100 | -3.35823100 |
| H  | -5.69651600 | -1.77894400 | -3.18298900 |
| C  | -3.87375300 | -1.08312800 | -2.27992900 |
| C  | -4.33796100 | -1.38448800 | -0.87133500 |
| H  | -5.43859900 | -1.38430000 | -0.82249500 |
| H  | -3.99117100 | -2.39153300 | -0.62826400 |
| C  | -4.17761200 | 0.91625000  | -0.05350600 |

|   |             |             |             |
|---|-------------|-------------|-------------|
| H | -5.18321400 | 1.07523800  | 0.36918100  |
| H | -4.24009200 | 1.13366800  | -1.12509600 |
| C | -3.19331500 | 1.87697400  | 0.59817300  |
| C | -3.56038800 | 3.16566200  | 0.96867300  |
| H | -4.56623900 | 3.52626100  | 0.77508700  |
| C | -2.60862200 | 3.96900200  | 1.60217100  |
| H | -2.84807900 | 4.98873000  | 1.88907500  |
| C | -1.35981700 | 3.43499800  | 1.89906500  |
| H | -0.61979900 | 4.02440900  | 2.43009600  |
| C | -1.05658500 | 2.12145100  | 1.51300900  |
| C | -3.86915900 | -0.91450300 | 1.51927400  |
| H | -4.92340600 | -0.81958200 | 1.83002700  |
| H | -3.30287900 | -0.18216000 | 2.09617800  |
| C | -3.37662600 | -2.33277000 | 1.93091300  |
| C | -3.00452700 | -2.21641700 | 3.43636600  |
| H | -3.85168900 | -1.84073000 | 4.02639900  |
| H | -2.15382600 | -1.54028200 | 3.57321800  |
| H | -2.72382000 | -3.19603900 | 3.83705300  |
| C | -4.52558400 | -3.37113000 | 1.83331200  |
| H | -4.89329000 | -3.50700500 | 0.81236700  |
| H | -5.37263300 | -3.06897600 | 2.46131500  |
| H | -4.18168200 | -4.34883300 | 2.18706600  |
| C | -2.16403900 | -2.87760600 | 1.20051300  |
| H | -1.88331300 | -3.90864300 | 1.42634800  |
| N | -1.35381900 | -2.22892100 | 0.41211100  |
| O | 2.69240700  | 6.18381100  | 2.13288600  |
| N | 1.75988600  | 5.78784500  | 1.42949600  |
| C | 1.98048600  | 4.62228500  | 0.57505900  |
| O | 0.63423900  | 6.30478900  | 1.42127100  |
| C | 3.14147400  | 3.86079500  | 0.74358100  |
| C | 1.00208400  | 4.27594700  | -0.36290200 |
| C | 3.29812600  | 2.70083300  | -0.00734700 |
| H | 3.88464200  | 4.16718400  | 1.46970600  |
| C | 1.17174200  | 3.12429700  | -1.11719900 |
| H | 0.12272600  | 4.89700600  | -0.47649800 |
| C | 2.30161300  | 2.31676700  | -0.91544500 |
| H | 4.16821600  | 2.06475500  | 0.11206900  |
| H | 0.42293300  | 2.80760000  | -1.83168300 |
| O | 2.45950900  | 1.15712800  | -1.61737300 |
| P | 1.55515000  | -0.21269100 | -1.27812700 |
| O | 0.15656800  | 0.34021900  | -0.97652300 |
| O | 1.83671200  | -1.20259200 | -2.34224800 |
| O | 2.15906000  | -0.58823700 | 0.20744300  |
| C | 3.04986800  | -1.60957800 | 0.45582500  |

|                    |             |             |             |
|--------------------|-------------|-------------|-------------|
| C                  | 2.80900500  | -2.91920000 | 0.02407100  |
| C                  | 4.17352300  | -1.28830200 | 1.22445700  |
| C                  | 3.71850200  | -3.91359300 | 0.36435300  |
| H                  | 1.91331400  | -3.13722500 | -0.54199800 |
| C                  | 5.08020600  | -2.28280600 | 1.57067300  |
| H                  | 4.31555600  | -0.26176300 | 1.54619900  |
| C                  | 4.84197800  | -3.58777600 | 1.13167300  |
| H                  | 3.56087600  | -4.93821700 | 0.05146500  |
| H                  | 5.95886300  | -2.06458200 | 2.16461700  |
| N                  | 5.79220700  | -4.64204100 | 1.49469900  |
| O                  | 6.76806300  | -4.33260300 | 2.18785500  |
| O                  | 5.57264000  | -5.78849900 | 1.09227600  |
| O                  | -0.29332900 | -2.81511400 | -0.07802000 |
| C                  | 0.23483700  | 1.47223600  | 1.92111500  |
| H                  | 0.28128500  | 0.43005100  | 1.60831500  |
| H                  | 1.09236300  | 1.98961600  | 1.48581700  |
| H                  | 0.33902600  | 1.52373900  | 3.01186800  |
| C                  | -0.79152700 | 0.23674100  | -3.85220800 |
| H                  | -0.63577700 | 1.07575300  | -3.17141200 |
| H                  | -0.02021100 | -0.50498000 | -3.61659300 |
| H                  | -0.64620500 | 0.57264700  | -4.88253000 |
| 3-TS <sub>LB</sub> |             |             |             |
| Zn                 | 1.79921600  | -0.34201000 | -0.00758700 |
| N                  | 2.06974900  | -0.99688800 | 1.97863700  |
| N                  | 3.78057400  | -1.37656400 | -0.12573100 |
| N                  | 3.04011000  | 1.30486100  | -0.37595800 |
| C                  | 1.35513600  | -0.57175600 | 3.04526200  |
| C                  | 1.48667900  | -1.22510100 | 4.27870400  |
| H                  | 0.89837300  | -0.88061400 | 5.12233300  |
| C                  | 2.36194300  | -2.29573300 | 4.40705100  |
| H                  | 2.47045800  | -2.80590800 | 5.35978200  |
| C                  | 3.11229800  | -2.70138000 | 3.30083500  |
| H                  | 3.81724800  | -3.52431000 | 3.36553500  |
| C                  | 2.92701800  | -2.03153900 | 2.09922100  |
| C                  | 3.63491800  | -2.48090800 | 0.83234500  |
| H                  | 4.59851100  | -2.95371000 | 1.07648800  |
| H                  | 2.99973700  | -3.23620300 | 0.36752800  |
| C                  | 4.70357800  | -0.33116900 | 0.35080800  |
| H                  | 5.74928000  | -0.57953900 | 0.11500700  |
| H                  | 4.62105700  | -0.28103300 | 1.44172900  |
| C                  | 4.35329500  | 1.03996200  | -0.20258000 |
| C                  | 5.33381300  | 1.99287700  | -0.44837100 |
| H                  | 6.38148400  | 1.74442800  | -0.31132100 |
| C                  | 4.93647800  | 3.26525400  | -0.86477300 |

|   |             |             |             |
|---|-------------|-------------|-------------|
| H | 5.67761400  | 4.03420200  | -1.06271100 |
| C | 3.58263900  | 3.53652800  | -1.02589600 |
| H | 3.24244900  | 4.51597600  | -1.34427200 |
| C | 2.63358600  | 2.53459900  | -0.77995000 |
| C | 4.11539800  | -1.74089600 | -1.52392600 |
| H | 5.17804600  | -2.02904300 | -1.58353200 |
| H | 4.01188400  | -0.80701000 | -2.08599200 |
| C | 3.30617500  | -2.84109800 | -2.26345200 |
| C | 3.51066900  | -2.56001900 | -3.77891900 |
| H | 4.57936600  | -2.54855500 | -4.02573500 |
| H | 3.07563300  | -1.59635700 | -4.06411400 |
| H | 3.03597900  | -3.33958200 | -4.38352100 |
| C | 3.86411700  | -4.26146400 | -1.98564800 |
| H | 3.77802000  | -4.56223900 | -0.93901300 |
| H | 4.92197200  | -4.31162800 | -2.26806100 |
| H | 3.32516600  | -5.00355100 | -2.58420900 |
| C | 1.81330300  | -2.84329400 | -2.02638300 |
| H | 1.23074000  | -3.58955500 | -2.57174900 |
| N | 1.18463000  | -2.00774500 | -1.28711500 |
| O | -1.30155700 | 6.02063300  | -1.55068200 |
| N | -1.42325400 | 5.73958700  | -0.34072900 |
| C | -1.77118300 | 4.39773600  | 0.01951500  |
| O | -1.22237200 | 6.57409500  | 0.56205200  |
| C | -2.06148100 | 3.45397900  | -0.98546000 |
| C | -1.75406600 | 4.00764900  | 1.37187400  |
| C | -2.26239100 | 2.13231300  | -0.65110800 |
| H | -2.10220000 | 3.78195000  | -2.01791900 |
| C | -1.95814000 | 2.68357200  | 1.70419300  |
| H | -1.55629500 | 4.75396400  | 2.13283900  |
| C | -2.16343200 | 1.67896400  | 0.70486900  |
| H | -2.45831700 | 1.39877500  | -1.42432000 |
| H | -1.93620600 | 2.36362600  | 2.74136300  |
| O | -2.21522900 | 0.42641300  | 1.03665600  |
| P | -0.99201700 | -1.05518500 | -0.08269500 |
| O | -0.04302900 | 0.15120700  | -0.31060500 |
| O | -0.96467200 | -1.91287700 | 1.13987200  |
| O | -2.26513500 | -1.09263500 | -1.11899800 |
| C | -3.58957700 | -1.24048900 | -0.79597700 |
| C | -4.04266900 | -1.78235000 | 0.41484500  |
| C | -4.49036900 | -0.84974700 | -1.79395700 |
| C | -5.40790800 | -1.93500400 | 0.61539400  |
| H | -3.32889500 | -2.05348600 | 1.18196600  |
| C | -5.85563700 | -1.00298000 | -1.59438800 |
| H | -4.10160900 | -0.43064400 | -2.71575900 |

|                    |             |             |             |
|--------------------|-------------|-------------|-------------|
| C                  | -6.30284100 | -1.54813800 | -0.38786600 |
| H                  | -5.78862100 | -2.34656400 | 1.54190400  |
| H                  | -6.57119700 | -0.70664300 | -2.35111400 |
| N                  | -7.73835500 | -1.71957200 | -0.17201400 |
| O                  | -8.50985100 | -1.37138700 | -1.07341900 |
| O                  | -8.11333200 | -2.20678200 | 0.90030500  |
| O                  | -0.16863700 | -2.14025900 | -1.29542400 |
| C                  | 0.42689000  | 0.58586600  | 2.86796200  |
| H                  | 0.81760200  | 1.30446100  | 2.14205500  |
| H                  | -0.53832600 | 0.23777100  | 2.47556900  |
| H                  | 0.25616900  | 1.09901500  | 3.81839700  |
| C                  | 1.16574400  | 2.78271200  | -0.94279200 |
| H                  | 0.71616200  | 2.05921100  | -1.62826000 |
| H                  | 0.63143100  | 2.64347800  | 0.00272000  |
| H                  | 0.96982200  | 3.79426200  | -1.30397700 |
| 3-PC <sub>LB</sub> |             |             |             |
| Zn                 | 0.85614000  | -0.68949300 | 0.27725300  |
| N                  | 1.66933200  | -1.30015500 | 2.18448200  |
| N                  | 3.05344700  | -0.38024800 | -0.09097900 |
| N                  | 0.83688400  | 1.13496500  | -0.76512800 |
| C                  | 0.94856800  | -1.59031300 | 3.30132300  |
| C                  | 1.57408100  | -1.58548600 | 4.55715900  |
| H                  | 0.97899200  | -1.80687400 | 5.43560200  |
| C                  | 2.92517100  | -1.29018700 | 4.67209500  |
| H                  | 3.40339600  | -1.25856600 | 5.64631200  |
| C                  | 3.66019600  | -1.05197700 | 3.51287300  |
| H                  | 4.72465800  | -0.84617500 | 3.54827200  |
| C                  | 2.99956700  | -1.08837400 | 2.29080800  |
| C                  | 3.79974400  | -1.00946600 | 1.00650000  |
| H                  | 4.75165200  | -0.48953000 | 1.18696100  |
| H                  | 4.04796100  | -2.03110900 | 0.72215700  |
| C                  | 3.09791600  | 1.09827400  | 0.08571000  |
| H                  | 4.09018900  | 1.49699100  | -0.16036700 |
| H                  | 2.91284500  | 1.33008300  | 1.13747700  |
| C                  | 2.03248600  | 1.76536000  | -0.74235200 |
| C                  | 2.26314500  | 2.95633100  | -1.41388400 |
| H                  | 3.21849400  | 3.45649100  | -1.31325200 |
| C                  | 1.20725200  | 3.53155200  | -2.11868600 |
| H                  | 1.34032200  | 4.48382000  | -2.62072000 |
| C                  | -0.01555100 | 2.87464500  | -2.15618100 |
| H                  | -0.85719700 | 3.29323100  | -2.69620900 |
| C                  | -0.18961100 | 1.67014800  | -1.46351300 |
| C                  | 3.57659400  | -0.71540400 | -1.44228200 |
| H                  | 4.66608900  | -0.55299000 | -1.44532300 |



|   |             |             |             |
|---|-------------|-------------|-------------|
| H | 3.14739100  | 0.03154400  | -2.11435700 |
| C | 3.32121000  | -2.10000000 | -2.10199200 |
| C | 3.95525900  | -1.99743600 | -3.51283900 |
| H | 5.03044700  | -1.80862400 | -3.43778200 |
| H | 3.50575300  | -1.18964000 | -4.09915400 |
| H | 3.82012600  | -2.93217700 | -4.06487900 |
| C | 3.97543600  | -3.29794900 | -1.36714100 |
| H | 3.46921400  | -3.52911200 | -0.42710700 |
| H | 5.03435000  | -3.09575000 | -1.17266100 |
| H | 3.91787800  | -4.19717400 | -1.98846500 |
| C | 1.86433900  | -2.46804600 | -2.28281000 |
| H | 1.60359800  | -3.15207400 | -3.09338500 |
| N | 0.95294200  | -2.09928000 | -1.47507300 |
| O | 1.76576600  | 5.20791200  | 0.51676700  |
| N | 1.91338300  | 4.20483900  | 1.24369800  |
| C | 0.78164600  | 3.46726600  | 1.64948400  |
| O | 3.05506700  | 3.78248600  | 1.56420500  |
| C | -0.49295900 | 3.74470500  | 1.09483600  |
| C | 0.92926000  | 2.38784400  | 2.54928500  |
| C | -1.55091800 | 2.90338400  | 1.32993600  |
| H | -0.59247300 | 4.61129400  | 0.45162300  |
| C | -0.12995600 | 1.55173100  | 2.80104500  |
| H | 1.88457600  | 2.24936300  | 3.04478300  |
| C | -1.41754300 | 1.69913500  | 2.13464400  |
| H | -2.52354600 | 3.09332200  | 0.88510200  |
| H | -0.03782700 | 0.76410900  | 3.53729100  |
| O | -2.33316300 | 0.84210400  | 2.24176600  |
| P | -1.15798600 | -2.79402800 | -0.30412800 |
| O | -0.94484500 | -1.43558100 | 0.37281100  |
| O | -0.77210600 | -4.05843700 | 0.36124900  |
| O | -2.67489300 | -2.84936700 | -0.88970300 |
| C | -3.52151200 | -1.75284600 | -0.97049400 |
| C | -3.76629900 | -0.93051200 | 0.13268100  |
| C | -4.14648000 | -1.52736400 | -2.20013200 |
| C | -4.60579800 | 0.16804000  | -0.01280700 |
| H | -3.24683800 | -1.07336500 | 1.06963100  |
| C | -5.00849800 | -0.44570200 | -2.34074200 |
| H | -3.93864800 | -2.19541700 | -3.02837900 |
| C | -5.21753700 | 0.39563200  | -1.24541800 |
| H | -4.74008600 | 0.85335700  | 0.81377900  |
| H | -5.50543700 | -0.23428900 | -3.27895500 |
| N | -6.08258400 | 1.57043600  | -1.40987100 |
| O | -6.62105000 | 1.73830000  | -2.50685100 |
| O | -6.21529500 | 2.32522500  | -0.44669900 |

|   |             |             |             |
|---|-------------|-------------|-------------|
| O | -0.31462500 | -2.61228300 | -1.78568000 |
| C | -0.50573600 | -1.93583500 | 3.19396700  |
| H | -1.09815100 | -1.10874600 | 2.78600000  |
| H | -0.63739900 | -2.79480200 | 2.53099400  |
| H | -0.89586600 | -2.18621300 | 4.18289400  |
| C | -1.49479900 | 0.94239000  | -1.46498800 |
| H | -1.38864500 | -0.03789000 | -1.93785500 |
| H | -1.83077200 | 0.76717300  | -0.44259400 |
| H | -2.26094500 | 1.50674200  | -1.99859200 |
